# Supplementary material for: HLA Haplotypes and Differential Regional Incidence of COVID-19 in Brazil: A Population Study Based in a Large Bone Marrow Donors Bank Dataset
Source: Research Square preprint supplement (doi:10.21203/rs.3.rs-325153/v1), 2021-03-22
Supplement: Supplementary file 1 [file f42de56b389019e448688ef7.xlsx]

## Sheet: Brazilian states
State	Region	Sample size	HLA Allele
			A*01	A*02	A*03	A*11	A*23	A*24	A*25	A*26	A*29	A*30	A*31	A*32	A*33	A*34	A*36	A*43	A*66	A*68	A*69	A*74	A*80	B*07	B*08	B*13	B*14	B*15	B*18	B*27	B*35	B*37	B*38	B*39	B*40	B*41	B*42	B*44	B*45	B*46	B*47	B*48	B*49	B*50	B*51	B*52	B*53	B*54	B*55
Distrito Federal	CW	46599	0.08847	0.255625	0.08576	0.054524	0.054318	0.098469	0.01088	0.032768	0.048677	0.053743	0.044194	0.030864	0.034102	0.008855	0.00486	8.6e-05	0.010799	0.059963	0.001588	0.013742	0.0022	0.068311	0.048726	0.013458	0.05829	0.090652	0.04349	0.022785	0.114578	0.011258	0.019323	0.030255	0.047288	0.013042	0.015884	0.111303	0.019598	0.000569	0.002243	0.006435	0.029781	0.027903	0.080828	0.01814	0.024272	0.00071	0.010559
Goiás	CW	156736	0.091705	0.261031	0.08601	0.054029	0.055771	0.093216	0.009523	0.03453	0.048987	0.053885	0.043013	0.029322	0.033169	0.009044	0.005425	5.4e-05	0.01116	0.060576	0.001723	0.013252	0.002055	0.06462	0.052644	0.01403	0.055815	0.090431	0.042623	0.025734	0.112474	0.010522	0.016661	0.031707	0.043441	0.015407	0.016352	0.112925	0.020574	0.000176	0.001832	0.006214	0.031879	0.030537	0.082705	0.018908	0.024911	0.000211	0.009302
Mato Grosso	CW	60382	0.090561	0.2555	0.089016	0.049842	0.050732	0.096051	0.011955	0.031089	0.044223	0.054803	0.052395	0.030146	0.0319	0.008038	0.005072	5e-05	0.009547	0.069543	0.001476	0.013373	0.001805	0.067856	0.050912	0.014517	0.051968	0.096967	0.046677	0.021286	0.117355	0.010839	0.020058	0.038115	0.047303	0.011189	0.017655	0.103993	0.018	0.000331	0.001963	0.009217	0.026112	0.022837	0.081445	0.021183	0.025104	0.000423	0.010766
Mato Grosso do Sul	CW	131729	0.088139	0.251883	0.086372	0.052786	0.048494	0.102673	0.011851	0.03193	0.045357	0.053618	0.056264	0.028767	0.030885	0.007545	0.004854	2.3e-05	0.009343	0.070843	0.001982	0.011871	0.001687	0.065857	0.047417	0.014439	0.052026	0.096671	0.044175	0.020108	0.118164	0.009575	0.020451	0.04175	0.053596	0.01245	0.015661	0.10241	0.018076	0.000494	0.002107	0.012863	0.026563	0.022282	0.081651	0.021225	0.021757	0.00122	0.009471
Alagoas	NE	40299	0.085804	0.248189	0.08912	0.052721	0.057037	0.090975	0.009624	0.028462	0.046033	0.061877	0.049801	0.030437	0.032414	0.009912	0.006693	5e-05	0.011494	0.066135	0.002196	0.016966	0.00196	0.073836	0.045055	0.01493	0.056346	0.100358	0.039256	0.02113	0.105088	0.008876	0.017716	0.033683	0.047808	0.012797	0.017827	0.101969	0.021167	0.000298	0.002834	0.009065	0.027554	0.023741	0.081691	0.020097	0.030602	0.000211	0.01026
Bahia	NE	136359	0.074315	0.240492	0.088491	0.047193	0.069639	0.077132	0.009324	0.025758	0.041035	0.085083	0.031305	0.025961	0.039833	0.013712	0.01205	3.3e-05	0.013675	0.071824	0.001764	0.024713	0.003672	0.070719	0.041261	0.012099	0.056415	0.109908	0.04374	0.01582	0.10797	0.009729	0.012203	0.027664	0.039168	0.01111	0.028524	0.101244	0.027373	0.000165	0.002523	0.0048	0.029436	0.021783	0.070569	0.018203	0.043678	0.000154	0.010338
Ceará	NE	166810	0.082948	0.258853	0.081172	0.050671	0.057384	0.092352	0.011036	0.030885	0.048879	0.05299	0.06196	0.028883	0.0304	0.008602	0.005131	7.2e-05	0.010061	0.066006	0.001907	0.014228	0.002379	0.063207	0.042814	0.012766	0.053841	0.10485	0.042166	0.018566	0.112112	0.011073	0.020509	0.035504	0.060952	0.012185	0.015516	0.108846	0.016537	8.7e-05	0.001948	0.009634	0.026129	0.02981	0.08059	0.019339	0.023388	3.9e-05	0.009408
Maranhão	NE	19798	0.077592	0.253227	0.075066	0.042737	0.060355	0.096859	0.009156	0.026662	0.043849	0.06032	0.070915	0.026285	0.034553	0.010829	0.006667	0	0.012867	0.06648	0.001793	0.019172	0.003258	0.061301	0.041974	0.010956	0.054467	0.110445	0.038168	0.0192	0.115601	0.009531	0.016551	0.043363	0.058201	0.01342	0.019048	0.093253	0.020317	0.000152	0.001515	0.010821	0.025859	0.023779	0.071811	0.022811	0.03047	0.000101	0.008652
Paraíba	NE	61930	0.085741	0.254796	0.078411	0.05025	0.056011	0.098421	0.009667	0.03261	0.050055	0.057615	0.050044	0.030891	0.031273	0.008764	0.004812	0.000218	0.013009	0.066794	0.001845	0.013686	0.002689	0.073787	0.041702	0.014111	0.05794	0.094793	0.035493	0.020748	0.103502	0.012213	0.021773	0.034863	0.05816	0.011726	0.017741	0.101703	0.017648	0.000218	0.002753	0.008284	0.024841	0.02911	0.084429	0.01762	0.029279	4e-05	0.007966
Pernambuco	NE	119269	0.081233	0.248479	0.082669	0.053915	0.064094	0.095017	0.010541	0.028529	0.04444	0.064494	0.043653	0.032119	0.032206	0.009485	0.005735	0.000126	0.014602	0.063418	0.003016	0.017633	0.002356	0.070725	0.040021	0.015516	0.057348	0.10297	0.038223	0.017724	0.100158	0.011513	0.017925	0.028482	0.047554	0.015535	0.021107	0.103093	0.020353	0.000151	0.002519	0.008265	0.027033	0.02793	0.084184	0.018309	0.030398	3.8e-05	0.011687
Piauí	NE	79540	0.071992	0.254187	0.080971	0.045748	0.060654	0.09114	0.010485	0.026234	0.043057	0.067473	0.062104	0.025011	0.035318	0.009731	0.008244	2.5e-05	0.011955	0.064667	0.001572	0.020835	0.004266	0.063294	0.042445	0.011588	0.050678	0.111553	0.036563	0.018135	0.110447	0.010437	0.017446	0.035459	0.057994	0.011726	0.018491	0.102369	0.021169	8.8e-05	0.001635	0.010792	0.026684	0.028985	0.072452	0.01959	0.031524	3.1e-05	0.010401
Rio Grande do Norte	NE	66453	0.08748	0.254408	0.076892	0.048291	0.057942	0.103839	0.012372	0.024627	0.049696	0.05289	0.053722	0.033033	0.03321	0.008671	0.005858	0.000196	0.010191	0.065054	0.001415	0.014864	0.002543	0.066577	0.043557	0.012568	0.056083	0.095599	0.037075	0.022766	0.107063	0.015349	0.025638	0.033014	0.053262	0.010979	0.015181	0.109882	0.018454	0.000414	0.00223	0.008963	0.028822	0.029886	0.077819	0.019607	0.029058	7.5e-05	0.007581
Sergipe	NE	34037	0.078985	0.24216	0.091013	0.050772	0.065143	0.088981	0.011	0.027019	0.048695	0.076892	0.036371	0.031131	0.030732	0.010881	0.00799	0	0.01322	0.060092	0.003465	0.02099	0.00213	0.072132	0.040313	0.013893	0.053006	0.107881	0.052445	0.013199	0.108046	0.009683	0.015235	0.031613	0.04104	0.011856	0.019939	0.113565	0.024464	0.000544	0.002027	0.005749	0.026303	0.020336	0.068368	0.019147	0.031069	8.8e-05	0.012653
Acre	NO	6074	0.077777	0.261539	0.075848	0.04323	0.054961	0.096898	0.009198	0.029025	0.045703	0.059652	0.068845	0.029982	0.028778	0.00992	0.00562	0	0.009467	0.075222	0.000988	0.013336	0.002387	0.062015	0.040895	0.010948	0.048002	0.11463	0.039459	0.019364	0.115315	0.009275	0.020227	0.044473	0.059823	0.01201	0.019215	0.100177	0.016611	8.2e-05	0.001729	0.014429	0.019725	0.023365	0.081285	0.02067	0.026434	8.2e-05	0.008067
Amapá	NO	25928	0.059731	0.256034	0.063318	0.039065	0.047071	0.147467	0.007258	0.024108	0.037727	0.049296	0.102312	0.022785	0.026863	0.010666	0.003955	9.6e-05	0.008331	0.074429	0.00135	0.015169	0.001388	0.047917	0.03731	0.007069	0.049319	0.11003	0.027152	0.016006	0.147872	0.006799	0.013904	0.071119	0.070938	0.009848	0.011909	0.080567	0.017869	7.7e-05	0.001543	0.016221	0.023403	0.01981	0.077921	0.039068	0.025149	9.6e-05	0.008879
Amazonas	NO	30383	0.065653	0.270432	0.062312	0.040113	0.045144	0.139148	0.007625	0.024582	0.037765	0.044183	0.104645	0.023678	0.025365	0.007702	0.003801	0	0.007702	0.071482	0.001498	0.013559	0.001761	0.050658	0.033301	0.010184	0.045438	0.106807	0.032129	0.014918	0.144362	0.007842	0.015378	0.071153	0.075388	0.009439	0.012606	0.086429	0.014089	0.000133	0.001942	0.019108	0.020984	0.023029	0.079554	0.038828	0.022386	0.000329	0.008012
Pará	NO	102592	0.064472	0.256158	0.068979	0.041935	0.049916	0.126872	0.007418	0.030815	0.041813	0.048507	0.094436	0.026654	0.027919	0.008361	0.004384	8.3e-05	0.009126	0.073031	0.001651	0.013795	0.002276	0.055263	0.035968	0.009625	0.048443	0.101423	0.033175	0.017524	0.136025	0.007583	0.017387	0.062291	0.067896	0.011743	0.013819	0.091924	0.016371	0.000151	0.001527	0.01592	0.02386	0.021859	0.078949	0.032852	0.024481	0.000259	0.00928
Rondônia	NO	92064	0.08687	0.254215	0.08766	0.052785	0.052787	0.09561	0.012677	0.030068	0.043587	0.056562	0.051203	0.030257	0.031893	0.009266	0.005604	4.3e-05	0.009715	0.067625	0.0017	0.014329	0.002516	0.069517	0.049302	0.014537	0.053523	0.097133	0.046056	0.019716	0.115226	0.010799	0.018035	0.038443	0.049227	0.011781	0.01697	0.107279	0.019288	0.000239	0.001711	0.008368	0.025981	0.023384	0.077116	0.020106	0.027204	0.000206	0.010346
Rorâima	NO	8155	0.070533	0.270248	0.068877	0.04596	0.050619	0.110849	0.009871	0.027643	0.039773	0.052084	0.081933	0.026721	0.027459	0.00748	0.005079	0.000123	0.009994	0.074517	0.001165	0.016482	0.002085	0.05474	0.036693	0.011327	0.047263	0.114462	0.038029	0.016703	0.130421	0.009013	0.016665	0.053932	0.065411	0.008853	0.015058	0.088809	0.016876	0.000368	0.00233	0.014027	0.021185	0.024123	0.082033	0.030001	0.025825	0.000123	0.008768
Tocantins	NO	35534	0.077391	0.255514	0.083336	0.047355	0.056936	0.093831	0.010198	0.027725	0.047779	0.06359	0.052045	0.027844	0.034257	0.010385	0.0069	9.8e-05	0.012032	0.067112	0.00121	0.020161	0.002589	0.062818	0.04395	0.01322	0.049688	0.107673	0.04038	0.020713	0.112466	0.010024	0.015964	0.035633	0.048096	0.01304	0.02121	0.105292	0.020317	0.000169	0.001762	0.008803	0.029178	0.027114	0.073944	0.019914	0.03337	0.000197	0.009633
Espírito Santo	SE	129673	0.08912	0.252192	0.094043	0.048509	0.054205	0.094025	0.014889	0.02983	0.04367	0.060637	0.041114	0.031542	0.030692	0.009796	0.006687	8.1e-05	0.010645	0.067382	0.001461	0.014482	0.002548	0.069274	0.051932	0.01675	0.047005	0.094187	0.052832	0.019243	0.117904	0.010933	0.019257	0.033255	0.040748	0.012134	0.018746	0.107986	0.01789	0.000127	0.002275	0.005085	0.027335	0.021042	0.08003	0.017814	0.029783	5e-05	0.012219
Minas Gerais	SE	340630	0.0898	0.256451	0.088781	0.054157	0.060727	0.08691	0.010816	0.031889	0.0482925	0.0580625	0.0342295	0.031678	0.0341375	0.010065	0.0069485	8.2e-05	0.012182	0.0635815	0.0018935	0.014052	0.0022775	0.0684685	0.0529605	0.0140755	0.059372	0.088116	0.0438855	0.0239155	0.110408	0.010897	0.0178055	0.026876	0.0393545	0.0153745	0.0181705	0.11574	0.0220895	0.000191	0.0018325	0.004253	0.0334435	0.0287835	0.080891	0.0160845	0.0287925	0.000172	0.008545
Rio de Janeiro	SE	198251	0.086001	0.247465	0.0896895	0.0506415	0.0623195	0.091588	0.010712	0.03043	0.048432	0.062706	0.0373135	0.031257	0.033692	0.010259	0.007185	0.000131	0.0129445	0.0640005	0.0019705	0.0165445	0.0024815	0.070423	0.049949	0.014171	0.057964	0.090592	0.0433355	0.020407	0.109459	0.01061	0.020675	0.027701	0.041087	0.0141785	0.0183895	0.114806	0.020941	0.000222	0.002188	0.0049265	0.030833	0.025586	0.0792755	0.0151395	0.03025	0.0002175	0.0090445
São Paulo	SE	1112017	0.0939367	0.255166	0.0932426	0.0564111	0.0478199	0.10218	0.0123673	0.0362879	0.0442477	0.053965	0.0420827	0.033251	0.0308187	0.00709143	0.004903	6.82857e-05	0.00914429	0.0591116	0.00192586	0.0111899	0.001745	0.0656779	0.0503207	0.0170017	0.0522889	0.0878229	0.0528916	0.0213669	0.121478	0.0108499	0.0225326	0.0331414	0.0441931	0.013715	0.0135414	0.105055	0.0172747	0.000752143	0.00222314	0.00579257	0.0290153	0.0240524	0.0858309	0.0195099	0.0238017	0.00134357	0.0115171
Paraná	SO	456567	0.0994687	0.265047	0.100667	0.0546273	0.0401893	0.106295	0.0163747	0.0371017	0.0413473	0.0413607	0.0506803	0.0331067	0.027669	0.005304	0.00326133	5.7e-05	0.007709	0.0564353	0.001493	0.00729933	0.00124067	0.0722387	0.0562877	0.018642	0.0497543	0.0876717	0.052451	0.0256443	0.120436	0.0101837	0.0254283	0.0359797	0.0493773	0.012424	0.008865	0.106336	0.014162	0.000747667	0.00233467	0.00800033	0.0258363	0.020881	0.085587	0.0220913	0.0166097	0.00121067	0.0120033
Rio Grande do Sul	SO	319246	0.107192	0.273049	0.109086	0.052885	0.0386495	0.105228	0.016144	0.0339895	0.0447735	0.0346555	0.0489415	0.036548	0.023941	0.0037545	0.0028045	3.9e-05	0.0066875	0.0514655	0.0016405	0.0049105	0.000891	0.0785035	0.063434	0.019307	0.0494875	0.081651	0.0502765	0.0273035	0.122739	0.0109105	0.0241385	0.033801	0.050778	0.0112275	0.005094	0.115916	0.012511	8.95e-05	0.0021945	0.007095	0.0242595	0.0194135	0.0881875	0.0146405	0.012996	8.3e-05	0.0133905
Santa Catarina	SO	171658	0.110355	0.278521	0.111789	0.05392	0.0373	0.101376	0.017022	0.035647	0.047103	0.031268	0.045746	0.035399	0.023151	0.002802	0.001766	2e-05	0.006515	0.051129	0.001436	0.003928	0.000708	0.082552	0.062704	0.018536	0.045981	0.076717	0.049786	0.028122	0.126619	0.011951	0.025895	0.032629	0.050748	0.010205	0.003988	0.124082	0.010027	0.000204	0.003258	0.005271	0.025199	0.019419	0.086675	0.01481	0.013043	0.000242	0.013624
CW: Central-West; NE: Northeast; NO: North; SE: Southeast; SO: South.
[truncated: 23 more columns]

## Sheet: Cities with 50+ deaths
City	State	Region	Sample size	HLA Allele
				A*01	A*02	A*03	A*11	A*23	A*24	A*25	A*26	A*29	A*30	A*31	A*32	A*33	A*34	A*36	A*43	A*66	A*68	A*69	A*74	A*80	B*07	B*08	B*13	B*14	B*15	B*18	B*27	B*35	B*37	B*38	B*39	B*40	B*41	B*42	B*44	B*45	B*46	B*47	B*48	B*49	B*50	B*51	B*52	B*53	B*54
Brasília	Distrito Federal	CW	46599	0.08847	0.255625	0.08576	0.054524	0.054318	0.098469	0.01088	0.032768	0.048677	0.053743	0.044194	0.030864	0.034102	0.008855	0.00486	8.6e-05	0.010799	0.059963	0.001588	0.013742	0.0022	0.068311	0.048726	0.013458	0.05829	0.090652	0.04349	0.022785	0.114578	0.011258	0.019323	0.030255	0.047288	0.013042	0.015884	0.111303	0.019598	0.000569	0.002243	0.006435	0.029781	0.027903	0.080828	0.01814	0.024272	0.00071
Anápolis	Goiás	CW	10577	0.090214	0.258635	0.086314	0.053198	0.058114	0.093357	0.00832	0.03368	0.049809	0.049555	0.045806	0.034005	0.034994	0.008934	0.005391	0	0.00988	0.061076	0.002411	0.012041	0.001796	0.059642	0.053897	0.015051	0.056058	0.087767	0.041485	0.027424	0.113927	0.011121	0.015288	0.033116	0.043444	0.015917	0.014771	0.113262	0.021454	0.00019	0.00208	0.005411	0.03307	0.032192	0.08538	0.020983	0.022912	0.000284
Aparecida de Goiânia	Goiás	CW	10211	0.085519	0.257228	0.083391	0.052613	0.062298	0.088566	0.011198	0.03121	0.046806	0.061968	0.041525	0.027471	0.034104	0.011296	0.006072	4.9e-05	0.011819	0.064536	0.001273	0.016121	0.002204	0.065318	0.049604	0.011441	0.056196	0.095997	0.042597	0.021871	0.113925	0.011374	0.014317	0.034244	0.04299	0.014626	0.01997	0.107913	0.021587	0.000196	0.001823	0.005876	0.030887	0.028766	0.077646	0.019993	0.02782	0.000147
Caldas Novas	Goiás	CW	3059	0.099542	0.272311	0.091697	0.051814	0.058843	0.094475	0.009971	0.033835	0.053449	0.043151	0.043151	0.03269	0.02746	0.006702	0.006865	0.000163	0.011115	0.047891	0.002125	0.010624	0.002125	0.067469	0.047745	0.012855	0.059108	0.092003	0.041867	0.031501	0.102846	0.00948	0.018634	0.030504	0.037026	0.018425	0.011871	0.113798	0.017326	0.000334	0.002452	0.004904	0.031233	0.032546	0.088266	0.018753	0.025592	0.000654
Catalão	Goiás	CW	6466	0.098126	0.257646	0.101596	0.063633	0.050187	0.096107	0.008274	0.03775	0.045874	0.044076	0.041074	0.027512	0.028089	0.008323	0.005645	0	0.008632	0.061081	0.00116	0.011189	0.001547	0.067887	0.054103	0.019396	0.059134	0.081951	0.046624	0.025444	0.12394	0.010173	0.018249	0.029622	0.045079	0.017868	0.012872	0.109886	0.020293	0.000155	0.001637	0.00549	0.03392	0.026779	0.083108	0.015231	0.019505	7.7e-05
Formosa	Goiás	CW	256	0.091008	0.277113	0.071944	0.054283	0.045955	0.08904	0.019531	0.044922	0.042481	0.037109	0.046418	0.017578	0.03125	0.015625	0.001953	0	0.024679	0.056641	0.001953	0.023438	0	0.074126	0.048828	0.005859	0.050648	0.091569	0.050781	0.011719	0.101287	0.005859	0.017578	0.019531	0.035156	0.02514	0.013672	0.105003	0.025391	0.001953	0.003906	0.007812	0.023438	0.033203	0.095703	0.021484	0.031042	0
Goianésia	Goiás	CW	682	0.097449	0.249149	0.076915	0.056414	0.054239	0.109912	0.005132	0.026393	0.054213	0.033724	0.047624	0.028592	0.032991	0.021963	0.004399	0.000733	0.014663	0.070341	0.000733	0.01393	0	0.06305	0.059384	0.009531	0.061584	0.082845	0.040323	0.024194	0.129765	0.012463	0.016862	0.031525	0.035924	0.012463	0.01173	0.119501	0.028592	0	0	0.002199	0.030792	0.038123	0.082111	0.019062	0.020528	0.000733
Goiânia	Goiás	CW	61095	0.090741	0.26145	0.086199	0.055351	0.054833	0.095217	0.009581	0.034265	0.049356	0.053412	0.042701	0.029827	0.032758	0.008805	0.005304	7.4e-05	0.011291	0.059296	0.001931	0.013096	0.002114	0.064127	0.052393	0.013985	0.056325	0.089823	0.042594	0.025436	0.113516	0.010463	0.017204	0.031836	0.043376	0.014648	0.015985	0.113785	0.019475	0.000205	0.00185	0.006055	0.031743	0.031231	0.084435	0.01936	0.024142	0.000246
Inhumas	Goiás	CW	1452	0.086957	0.262467	0.084263	0.065445	0.057643	0.093673	0.007724	0.03835	0.047498	0.050849	0.049577	0.024002	0.031941	0.007576	0.00551	0	0.006198	0.056952	0.000689	0.014807	0.002755	0.071451	0.05043	0.018595	0.063433	0.087373	0.035276	0.027204	0.112048	0.014213	0.019284	0.039079	0.040289	0.018939	0.016873	0.112301	0.01849	0	0.001073	0.005165	0.035212	0.030992	0.072245	0.014118	0.020219	0.000689
Itumbiara	Goiás	CW	2019	0.097034	0.26612	0.081839	0.054069	0.061765	0.087718	0.010203	0.031772	0.0464	0.059404	0.034797	0.031655	0.027887	0.012135	0.008309	0	0.009906	0.056774	0.001981	0.014859	0.001981	0.074169	0.054915	0.01532	0.048456	0.089511	0.045021	0.02718	0.108571	0.010401	0.018297	0.029451	0.034622	0.014611	0.016561	0.112787	0.02105	0	0.001734	0.007925	0.031929	0.022512	0.092754	0.019289	0.026746	0
Jataí	Goiás	CW	5306	0.08615	0.264925	0.081904	0.05682	0.055571	0.087149	0.010271	0.038641	0.043855	0.059645	0.04662	0.027989	0.034569	0.006596	0.004052	9.4e-05	0.011968	0.060268	0.00066	0.016786	0.002073	0.067592	0.048863	0.016764	0.056008	0.098458	0.045467	0.022201	0.100086	0.011954	0.016282	0.033966	0.043023	0.014301	0.017046	0.116834	0.022586	0.000377	0.002639	0.006596	0.027114	0.025988	0.080562	0.01912	0.026912	9.4e-05
Luziânia	Goiás	CW	809	0.08529	0.257726	0.071693	0.045117	0.049444	0.088381	0.008653	0.030284	0.055006	0.066131	0.035847	0.033993	0.040791	0.012361	0.010507	0	0.017305	0.075402	0.002472	0.010507	0.00309	0.078575	0.050845	0.009271	0.046811	0.094885	0.041056	0.024722	0.110125	0.010507	0.016687	0.018872	0.04805	0.020396	0.02074	0.116904	0.019159	0	0.000618	0.004944	0.03317	0.019159	0.083136	0.018541	0.02696	0
Mineiros	Goiás	CW	1248	0.094952	0.279247	0.08734	0.035657	0.048478	0.093349	0.009615	0.038462	0.046875	0.066907	0.046074	0.027644	0.03726	0.007212	0.003606	0	0.012019	0.053285	0.000801	0.010817	0.000401	0.078926	0.044071	0.015224	0.059696	0.076923	0.066106	0.01883	0.095353	0.011218	0.016026	0.039663	0.035657	0.016426	0.018029	0.121394	0.017628	0	0.004006	0.002804	0.026843	0.029247	0.076122	0.01883	0.031651	0
Rio Verde	Goiás	CW	5671	0.092152	0.260351	0.083399	0.054058	0.051257	0.089183	0.009787	0.035425	0.046296	0.05755	0.047929	0.030989	0.034895	0.007759	0.005907	0	0.010636	0.062502	0.001323	0.012814	0.002645	0.06417	0.050728	0.014857	0.054426	0.090397	0.04277	0.022893	0.112069	0.00964	0.016997	0.033835	0.042108	0.015055	0.019504	0.103701	0.02099	8.8e-05	0.00152	0.006877	0.034387	0.033769	0.084395	0.020526	0.027266	8.8e-05
Santa Helena de Goiás	Goiás	CW	243	0.111111	0.259259	0.096708	0.041152	0.04321	0.063786	0.006173	0.047325	0.049383	0.063786	0.047325	0.030864	0.034979	0.002058	0	0	0.00823	0.076132	0.002058	0.014403	0.002058	0.065486	0.069451	0.012346	0.067379	0.100823	0.03881	0.032922	0.087933	0.004115	0.010288	0.028807	0.047085	0.016461	0.006173	0.116763	0.032922	0	0	0	0.018519	0.039095	0.088342	0.012346	0.016461	0
Senador Canedo	Goiás	CW	1765	0.083853	0.244476	0.084703	0.045609	0.05949	0.094901	0.007932	0.032861	0.046742	0.06119	0.051558	0.030028	0.034844	0.008215	0.008782	0	0.012748	0.071671	0.001416	0.017564	0.001416	0.068118	0.0452	0.011537	0.058462	0.101737	0.044683	0.02153	0.107131	0.016026	0.010198	0.030028	0.052604	0.016714	0.023796	0.097108	0.023229	0.000283	0.000567	0.007082	0.026062	0.030524	0.076617	0.015581	0.030772	0
Trindade	Goiás	CW	2415	0.0865	0.26339	0.088535	0.053221	0.056378	0.090015	0.008075	0.031609	0.046022	0.058145	0.045324	0.028327	0.029634	0.012075	0.004969	0	0.011387	0.062791	0.001863	0.015942	0.002692	0.065731	0.049021	0.011344	0.050448	0.091387	0.040509	0.024431	0.119473	0.00911	0.014665	0.028928	0.044695	0.019876	0.020833	0.106243	0.024178	0.000207	0.001242	0.009266	0.030929	0.031263	0.082093	0.019876	0.026066	0
Valparaíso de Goiás	Goiás	CW	275	0.085455	0.272727	0.081818	0.052727	0.043636	0.081818	0.007273	0.030909	0.049091	0.058182	0.038182	0.027273	0.032727	0.014545	0.009091	0	0.018182	0.076364	0.001818	0.018182	0	0.058119	0.056299	0.003636	0.058056	0.103601	0.036265	0.018182	0.116268	0.018182	0.016364	0.025455	0.049017	0.017993	0.02	0.114351	0.021818	0	0.001818	0.010909	0.029091	0.02	0.067273	0.02	0.036265	0
Barra do Garças	Mato Grosso	CW	1003	0.105939	0.243354	0.08877	0.048969	0.050285	0.090773	0.007976	0.03027	0.049065	0.05566	0.048564	0.025424	0.02927	0.00997	0.004487	0	0.006481	0.079185	0.000499	0.016745	0.002493	0.061316	0.053838	0.015952	0.049352	0.095214	0.04337	0.020439	0.102692	0.012961	0.019442	0.036889	0.047856	0.020439	0.017946	0.113659	0.021934	0.000499	0.002493	0.007478	0.023928	0.02991	0.084247	0.016451	0.023928	0.000499
Cuiabá	Mato Grosso	CW	13438	0.089708	0.256083	0.086032	0.046669	0.051439	0.099828	0.01146	0.026912	0.039472	0.056335	0.057143	0.029956	0.031724	0.008577	0.006128	0	0.010328	0.073872	0.001563	0.013873	0.001563	0.066237	0.050634	0.012747	0.052622	0.103404	0.044726	0.02104	0.118459	0.009637	0.020727	0.041654	0.048466	0.010707	0.020588	0.098395	0.017216	0.000446	0.002009	0.010589	0.024738	0.024328	0.078362	0.022581	0.024941	0.000484
Rondonópolis	Mato Grosso	CW	9268	0.090591	0.258907	0.086132	0.047629	0.05513	0.088942	0.011145	0.030934	0.049774	0.057035	0.047079	0.028631	0.036148	0.0082	0.004316	0	0.010562	0.070331	0.001529	0.013262	0.002266	0.068071	0.049292	0.012657	0.052525	0.095938	0.045368	0.020311	0.114387	0.011879	0.017348	0.034538	0.047681	0.012236	0.01829	0.110116	0.019069	0.00027	0.002644	0.008362	0.02838	0.024242	0.083554	0.020271	0.024007	0.000548
Sinop	Mato Grosso	CW	2658	0.100919	0.257114	0.101295	0.05715	0.040446	0.101727	0.01252	0.034212	0.045697	0.041201	0.044256	0.03683	0.028586	0.007148	0.003198	0	0.008277	0.062766	0.001129	0.009406	0.001129	0.068679	0.055492	0.016883	0.04811	0.090984	0.049962	0.024231	0.12159	0.012227	0.023594	0.030257	0.046719	0.0133	0.011035	0.108443	0.014861	0.000752	0.002069	0.005169	0.023819	0.022839	0.096254	0.015752	0.020087	0.001505
Sorriso	Mato Grosso	CW	869	0.094266	0.262711	0.088	0.056417	0.056996	0.095428	0.012083	0.029726	0.039359	0.051781	0.050225	0.029919	0.029072	0.005754	0.002301	0	0.006904	0.063942	0.001726	0.008055	0.002301	0.072497	0.051784	0.020138	0.045455	0.081703	0.055811	0.025892	0.109896	0.013809	0.028193	0.042002	0.047181	0.012658	0.012083	0.104718	0.008055	0	0.000575	0.008055	0.028769	0.020138	0.088032	0.021864	0.021289	0.000575
Várzea Grande	Mato Grosso	CW	3136	0.083831	0.244975	0.08362	0.04809	0.057733	0.091969	0.00861	0.031975	0.03962	0.053593	0.066788	0.027097	0.034942	0.007972	0.007972	0	0.013938	0.074847	0.000638	0.017339	0.001594	0.064533	0.041593	0.014828	0.052401	0.106104	0.042198	0.021524	0.114376	0.007653	0.017348	0.048097	0.051922	0.01018	0.021167	0.096512	0.019916	0.000478	0.001276	0.012596	0.025032	0.023403	0.074856	0.022947	0.027094	0.000159
Aquidauana	Mato Grosso do Sul	CW	1637	0.078629	0.25877	0.087145	0.045657	0.050222	0.097825	0.012217	0.031283	0.045657	0.049639	0.06846	0.02744	0.028568	0.008552	0.007025	0	0.007941	0.080102	0.000916	0.008858	0.002443	0.064814	0.045427	0.012297	0.042891	0.102632	0.042278	0.016799	0.128102	0.009643	0.012411	0.054424	0.06512	0.00733	0.015883	0.098811	0.017627	0.000305	0.001833	0.019159	0.025284	0.020078	0.07122	0.022602	0.020464	0.000611
Campo Grande	Mato Grosso do Sul	CW	75986	0.086332	0.252626	0.084643	0.053121	0.048633	0.105029	0.011355	0.032138	0.045251	0.053161	0.057043	0.028363	0.030751	0.007168	0.00499	2.6e-05	0.00954	0.071333	0.001972	0.011917	0.001681	0.0646	0.046124	0.014581	0.051901	0.095722	0.043487	0.019799	0.119639	0.00946	0.021225	0.042601	0.055056	0.012333	0.015345	0.101018	0.018189	0.000494	0.00227	0.013492	0.027128	0.022367	0.082403	0.021679	0.021271	0.001427
Corumbá	Mato Grosso do Sul	CW	1186	0.073767	0.258738	0.066308	0.046678	0.041672	0.111606	0.008853	0.024874	0.04203	0.052698	0.081429	0.020658	0.021814	0.008432	0.004216	0	0.007375	0.10624	0.001686	0.014612	0.00253	0.055228	0.038364	0.013491	0.040051	0.112563	0.036678	0.013069	0.129005	0.008853	0.020236	0.077993	0.059444	0.00801	0.01855	0.094013	0.016863	0	0.001686	0.021922	0.01855	0.019393	0.076307	0.031619	0.023187	0
Dourados	Mato Grosso do Sul	CW	13306	0.094124	0.24962	0.088668	0.054099	0.043938	0.104633	0.013965	0.032744	0.046144	0.048766	0.054973	0.031577	0.031656	0.007391	0.00357	0	0.007891	0.068836	0.002647	0.011566	0.001578	0.06788	0.052837	0.014535	0.052662	0.093154	0.045734	0.020562	0.118209	0.010855	0.020503	0.038096	0.053573	0.011828	0.014381	0.105985	0.017536	0.000864	0.001353	0.011264	0.026955	0.020203	0.07995	0.020046	0.02147	0.002131
Arapiraca	Alagoas	NE	2379	0.092055	0.2314	0.088693	0.054224	0.064103	0.083228	0.01198	0.026061	0.046238	0.067675	0.052963	0.030055	0.031736	0.014502	0.007776	0	0.01219	0.064103	0.001261	0.017234	0.002522	0.093847	0.034746	0.017744	0.049574	0.099046	0.039384	0.024074	0.091543	0.006726	0.015565	0.024285	0.043447	0.010423	0.01654	0.104897	0.026603	0	0.002522	0.006305	0.028542	0.023652	0.086335	0.021596	0.036718	0
Maceió	Alagoas	NE	17085	0.083596	0.250558	0.091936	0.055331	0.061944	0.088016	0.008546	0.02841	0.044914	0.062763	0.043949	0.031105	0.034849	0.009541	0.006406	5.9e-05	0.012757	0.061447	0.002049	0.018903	0.002751	0.076419	0.045305	0.015797	0.059838	0.10052	0.035829	0.021466	0.100786	0.008019	0.017506	0.029419	0.047529	0.013045	0.017696	0.100693	0.020537	0.000146	0.0036	0.006585	0.028948	0.025385	0.084784	0.017112	0.033458	8.8e-05
Rio Largo	Alagoas	NE	349	0.084392	0.234593	0.065845	0.044246	0.064353	0.088782	0.014327	0.019884	0.042894	0.083003	0.044413	0.024355	0.037249	0.008596	0.011461	0	0.017192	0.084392	0.005731	0.017192	0.005731	0.070201	0.028653	0.018625	0.067335	0.110315	0.060172	0.008596	0.110315	0.007163	0.017192	0.027221	0.041547	0.014327	0.028653	0.100287	0.015759	0	0.001433	0.002865	0.020057	0.024355	0.065903	0.020057	0.045845	0
Alagoinhas	Bahia	NE	1490	0.054362	0.233557	0.094966	0.043289	0.072148	0.072819	0.007718	0.024161	0.036577	0.103691	0.034564	0.027852	0.043289	0.013758	0.017785	0	0.015101	0.068792	0.001678	0.029195	0.004698	0.075168	0.034228	0.015436	0.05906	0.122483	0.041946	0.013087	0.10604	0.008389	0.011745	0.025503	0.029866	0.013758	0.033221	0.086577	0.028188	0	0.00302	0.004027	0.029866	0.021812	0.062416	0.017785	0.059396	0
Barreiras	Bahia	NE	915	0.085427	0.257128	0.087541	0.05507	0.059941	0.082219	0.006557	0.028415	0.050207	0.060433	0.043019	0.032144	0.039568	0.007104	0.004372	0	0.014754	0.065914	0.002186	0.013477	0.001093	0.07531	0.044099	0.010383	0.051176	0.099224	0.045249	0.020661	0.105795	0.010383	0.015301	0.028883	0.045744	0.012022	0.018033	0.103629	0.01694	0.000546	0.002186	0.006011	0.025048	0.029978	0.085187	0.017486	0.032024	0.000546
Camaçari	Bahia	NE	1582	0.068584	0.236094	0.092604	0.036346	0.075853	0.079962	0.008534	0.023072	0.035398	0.089444	0.032238	0.022124	0.037927	0.021176	0.012642	0	0.016119	0.079646	0.002212	0.026233	0.003793	0.082491	0.041719	0.013274	0.052465	0.1122	0.045828	0.01359	0.114096	0.009798	0.013906	0.031606	0.039191	0.009798	0.024968	0.097977	0.024652	0	0.00158	0.002212	0.025601	0.019279	0.067636	0.02086	0.045196	0
Candeias	Bahia	NE	1068	0.06492	0.232313	0.08633	0.039246	0.083043	0.061996	0.007244	0.019996	0.035703	0.114268	0.027046	0.01779	0.046678	0.017495	0.015759	0	0.014513	0.076511	0.000936	0.029963	0.004213	0.070826	0.029963	0.01264	0.055022	0.130514	0.042241	0.014513	0.109825	0.0086	0.008427	0.023697	0.030899	0.00515	0.036382	0.086468	0.041199	0	0.001404	0.005618	0.02294	0.019052	0.050183	0.013109	0.065711	0
Eunápolis	Bahia	NE	1229	0.078519	0.259154	0.080146	0.04882	0.060618	0.08096	0.013019	0.028885	0.03336	0.081774	0.036615	0.021562	0.030919	0.01546	0.013426	0	0.008544	0.075671	0.002441	0.027665	0.002441	0.0655	0.049634	0.011391	0.043124	0.117982	0.043531	0.020749	0.098047	0.011798	0.017494	0.028478	0.037022	0.006916	0.029699	0.1131	0.031326	0	0.002441	0.008137	0.027665	0.022376	0.072417	0.019935	0.036208	0
Feira de Santana	Bahia	NE	5084	0.077478	0.245265	0.098072	0.045195	0.068221	0.074407	0.00836	0.020932	0.040055	0.082694	0.027894	0.025997	0.040878	0.016602	0.013208	9.8e-05	0.01414	0.070492	0.000885	0.023392	0.003737	0.072144	0.046118	0.012158	0.062319	0.104639	0.041103	0.020601	0.108335	0.008851	0.0119	0.024761	0.038393	0.010917	0.027328	0.103941	0.024374	9.8e-05	0.003245	0.00236	0.027313	0.025437	0.07124	0.019123	0.042073	9.8e-05
Ilhéus	Bahia	NE	3812	0.071999	0.256272	0.083152	0.048482	0.056834	0.087956	0.011674	0.030536	0.043886	0.078427	0.031324	0.026204	0.037319	0.010857	0.009575	0	0.014248	0.072701	0.003541	0.021556	0.001836	0.068337	0.039743	0.011018	0.054696	0.112802	0.047744	0.016264	0.107817	0.0101	0.015871	0.029643	0.04171	0.012723	0.020986	0.112802	0.028069	0.000262	0.001443	0.006952	0.024003	0.018888	0.075551	0.017445	0.036595	0.000262
Itabuna	Bahia	NE	3143	0.081128	0.244179	0.092262	0.049791	0.067447	0.085103	0.012727	0.029587	0.042632	0.076038	0.034679	0.027201	0.035633	0.015271	0.009225	0	0.010977	0.058697	0.002068	0.022113	0.003182	0.065971	0.043898	0.011105	0.054311	0.120781	0.045127	0.016227	0.104197	0.008591	0.012381	0.027971	0.040855	0.011044	0.024293	0.106739	0.023496	0.000159	0.00175	0.007795	0.032588	0.02176	0.067226	0.015908	0.039363	0.000159
Jequié	Bahia	NE	942	0.071125	0.242569	0.087049	0.045648	0.058917	0.084395	0.010085	0.038217	0.046709	0.078025	0.030255	0.027601	0.039278	0.009554	0.011146	0	0.0138	0.079618	0.001062	0.018577	0.006369	0.069273	0.032378	0.011146	0.059152	0.102103	0.050199	0.014331	0.107629	0.009777	0.012208	0.02797	0.040605	0.009023	0.02017	0.117323	0.025293	0	0.003715	0.007962	0.034351	0.016213	0.074639	0.017516	0.042738	0
Juazeiro	Bahia	NE	3366	0.084691	0.244966	0.082842	0.054989	0.071467	0.088963	0.009358	0.025057	0.046875	0.059314	0.035919	0.033775	0.03131	0.009435	0.006536	0	0.013249	0.068204	0.001783	0.023984	0.002822	0.063666	0.042894	0.009609	0.05105	0.093955	0.043186	0.013781	0.112183	0.012032	0.012757	0.033839	0.054158	0.011586	0.025104	0.106266	0.02762	0.000149	0.000891	0.006536	0.028949	0.018258	0.075089	0.017083	0.03738	0
Lauro de Freitas	Bahia	NE	3282	0.083993	0.235266	0.083106	0.049905	0.062999	0.081709	0.009141	0.028597	0.043832	0.079912	0.030286	0.02543	0.043527	0.012752	0.012188	0	0.010791	0.079133	0.001523	0.02069	0.004113	0.075551	0.039602	0.013552	0.057124	0.108909	0.042954	0.017367	0.112872	0.009293	0.012797	0.027417	0.038689	0.011274	0.023915	0.103277	0.02681	0.000457	0.002438	0.003809	0.02864	0.020406	0.073423	0.019043	0.039748	0.000152
Paulo Afonso	Bahia	NE	500	0.071538	0.262579	0.084572	0.056127	0.061179	0.085576	0.009	0.024515	0.047345	0.070009	0.038626	0.030133	0.032586	0.01	0.011	0	0.005	0.057138	0.002	0.028553	0.001	0.066	0.044	0.006	0.055	0.114	0.05	0.035	0.088	0.012	0.01	0.026	0.037	0.012	0.032	0.109	0.016	0.001	0.002	0.005	0.024	0.021	0.084	0.021	0.044	0
Porto Seguro	Bahia	NE	379	0.067024	0.255225	0.083043	0.042085	0.078935	0.089448	0.010554	0.019789	0.03562	0.081723	0.042216	0.027704	0.038115	0.015831	0.011492	0	0.013193	0.068517	0	0.015831	0.001319	0.072559	0.036939	0.015831	0.046174	0.097625	0.043536	0.014512	0.101583	0.011873	0.007916	0.034301	0.044855	0.005277	0.036939	0.113456	0.025066	0.001319	0.002639	0.006596	0.025066	0.021108	0.088391	0.022427	0.040897	0
Salvador	Bahia	NE	66291	0.072785	0.235892	0.088471	0.04649	0.071428	0.073852	0.008691	0.025623	0.04116	0.089219	0.0294	0.025203	0.042107	0.0145	0.013349	3e-05	0.014187	0.072995	0.001833	0.025966	0.00394	0.071114	0.040117	0.012596	0.057507	0.108991	0.043076	0.015274	0.107729	0.009607	0.012253	0.025957	0.037585	0.011572	0.030971	0.100523	0.028282	0.000173	0.002557	0.004126	0.030124	0.022218	0.06848	0.017864	0.046448	9.8e-05
Simões Filho	Bahia	NE	1524	0.057828	0.236173	0.083496	0.041804	0.085353	0.072804	0.007874	0.025498	0.038442	0.099974	0.026542	0.017597	0.045873	0.01298	0.020344	0	0.011483	0.075072	0.00164	0.028946	0.005249	0.078412	0.032808	0.013451	0.055118	0.128937	0.042651	0.013451	0.099738	0.008202	0.00853	0.026575	0.03084	0.012139	0.034121	0.084974	0.026575	0	0.002953	0.005249	0.035761	0.021654	0.065945	0.019357	0.054134	0
Teixeira de Freitas	Bahia	NE	1959	0.072654	0.239404	0.086816	0.052704	0.066634	0.079098	0.012506	0.027622	0.042218	0.082821	0.042911	0.031024	0.029576	0.013895	0.005615	0	0.012613	0.070239	0.002042	0.01774	0.003063	0.068913	0.046452	0.011996	0.051046	0.108474	0.039816	0.01659	0.12047	0.011741	0.010209	0.032414	0.041603	0.009444	0.030117	0.108218	0.022205	0	0.001021	0.007147	0.029096	0.023737	0.071975	0.019908	0.037774	0.000255
Valença	Bahia	NE	1163	0.083612	0.247125	0.086683	0.048057	0.065708	0.072508	0.007739	0.021432	0.046302	0.083331	0.033534	0.024936	0.035212	0.015047	0.012898	0	0.014097	0.069493	0.003009	0.022663	0.004729	0.067373	0.030596	0.012038	0.040051	0.116493	0.046862	0.017197	0.104766	0.007309	0.013328	0.031384	0.040149	0.016977	0.028375	0.111205	0.030046	0	0.00215	0.00258	0.03237	0.01741	0.068345	0.020636	0.0467	0.00043
Vitória da Conquista	Bahia	NE	4275	0.078959	0.267161	0.08068	0.054633	0.057944	0.085261	0.01577	0.024701	0.039796	0.081148	0.037695	0.028139	0.033089	0.00924	0.007251	0	0.009474	0.066436	0.001637	0.016805	0.002573	0.06423	0.045404	0.010004	0.054141	0.105759	0.055946	0.016723	0.112928	0.012164	0.007949	0.029928	0.051646	0.009301	0.02379	0.106707	0.024909	0.000234	0.003509	0.008596	0.027407	0.022007	0.081469	0.01731	0.032114	0
Acaraú	Ceará	NE	119	0.071429	0.215966	0.098557	0.05042	0.058824	0.102829	0.016807	0.02521	0.092437	0.02521	0.082741	0.021008	0.012605	0.008403	0	0	0.018198	0.063025	0.004202	0.013749	0	0.058824	0.029412	0.008403	0.037815	0.121849	0.016807	0.02521	0.12605	0.012605	0.021008	0.016807	0.054622	0.004202	0.016807	0.12605	0.02521	0	0	0.016807	0.037815	0.037815	0.084034	0.012605	0.02521	0
Aracati	Ceará	NE	618	0.073625	0.241909	0.089806	0.048544	0.055016	0.072816	0.014563	0.032362	0.058252	0.067961	0.080906	0.029935	0.030744	0.010518	0.006472	0	0.003236	0.059061	0.001618	0.020227	0.002427	0.058132	0.029068	0.008091	0.04203	0.118032	0.042799	0.026699	0.126839	0.0089	0.011327	0.025081	0.052556	0.013754	0.029126	0.113127	0.006472	0	0	0.016181	0.029879	0.04203	0.078343	0.020957	0.026636	0
Barbalha	Ceará	NE	1715	0.081927	0.253193	0.075318	0.047925	0.062483	0.085643	0.008163	0.027817	0.046536	0.079294	0.0514	0.025011	0.031435	0.014286	0.005831	0	0.014592	0.067107	0.002041	0.014286	0.002332	0.059935	0.039874	0.009913	0.056754	0.109775	0.029095	0.015452	0.108873	0.010718	0.018322	0.039021	0.055228	0.017201	0.026239	0.100734	0.029387	0.000292	0.000875	0.007289	0.025589	0.02325	0.078914	0.023615	0.026239	0
Camocim	Ceará	NE	413	0.075061	0.267554	0.087167	0.03632	0.042373	0.119855	0.004843	0.01937	0.05569	0.053269	0.085956	0.027845	0.024213	0.004843	0.009685	0	0.010896	0.053269	0.001211	0.01816	0.002421	0.047025	0.045908	0.009685	0.046005	0.138954	0.032688	0.010563	0.142625	0.006053	0.019161	0.038741	0.065235	0.007264	0.021792	0.116061	0.016949	0	0.001211	0.020581	0.030266	0.01816	0.053099	0.01816	0.020382	0
Canindé	Ceará	NE	901	0.075472	0.26859	0.084906	0.04273	0.054384	0.069922	0.008879	0.029967	0.054384	0.056049	0.064373	0.031077	0.023862	0.007769	0.008324	0	0.007214	0.09323	0.00111	0.011654	0.006104	0.062689	0.04384	0.009989	0.051019	0.10092	0.053263	0.022752	0.107613	0.008817	0.019423	0.046563	0.06601	0.007769	0.019393	0.104258	0.018868	0	0.00111	0.008879	0.020533	0.034389	0.068222	0.013873	0.032723	0
Cascavel	Ceará	NE	690	0.091145	0.264561	0.112155	0.048335	0.044203	0.098402	0.013043	0.02971	0.043399	0.035318	0.072942	0.031053	0.01795	0.003931	0.005797	0	0.008696	0.064382	0.000725	0.010145	0.001449	0.063978	0.046886	0.008183	0.038876	0.106836	0.045719	0.022464	0.140866	0.014493	0.019928	0.0401	0.047613	0.010145	0.007444	0.098669	0.011398	0	0.001449	0.012319	0.020659	0.022509	0.100125	0.025362	0.017391	0.000725
Caucaia	Ceará	NE	3599	0.068825	0.270622	0.077872	0.043452	0.059533	0.097809	0.015143	0.028729	0.04175	0.050514	0.068699	0.029573	0.027895	0.007363	0.006807	0	0.009169	0.071889	0.002223	0.018713	0.002362	0.064879	0.040289	0.011531	0.052792	0.118505	0.043762	0.018755	0.115032	0.009586	0.019172	0.039733	0.066268	0.008475	0.015838	0.101417	0.013615	0	0.001528	0.011114	0.024312	0.027508	0.078216	0.020561	0.026952	0.000139
Crateús	Ceará	NE	768	0.063802	0.25651	0.097005	0.039062	0.067057	0.087891	0.009766	0.038411	0.044271	0.061198	0.067057	0.026693	0.027344	0.005208	0.004557	0.000651	0.009115	0.067057	0.005208	0.016276	0.005859	0.063714	0.041667	0.015625	0.055339	0.102696	0.039645	0.023111	0.112921	0.013021	0.025391	0.039062	0.072148	0.005208	0.015475	0.088282	0.014323	0	0.002604	0.019531	0.028555	0.026042	0.065583	0.01888	0.026693	0
Crato	Ceará	NE	8533	0.07601	0.257222	0.084979	0.052076	0.057559	0.087448	0.010242	0.035062	0.047836	0.063465	0.054375	0.023241	0.031163	0.013182	0.005332	0	0.0092	0.070203	0.002578	0.012753	0.002637	0.064931	0.042496	0.01725	0.051806	0.107326	0.040831	0.017983	0.115147	0.010733	0.018136	0.031786	0.054769	0.014139	0.020621	0.099275	0.018365	0.000117	0.002871	0.008438	0.024834	0.025805	0.079694	0.022512	0.023777	0
Eusébio	Ceará	NE	818	0.084337	0.243247	0.071506	0.047666	0.053173	0.105733	0.012225	0.036671	0.051951	0.047063	0.069674	0.022005	0.028117	0.007946	0.003667	0	0.017726	0.072729	0.002445	0.01956	0.002445	0.054283	0.043254	0.010391	0.050292	0.105491	0.049511	0.01467	0.121248	0.013447	0.01942	0.031078	0.061631	0.013447	0.01819	0.112782	0.017115	0	0.002445	0.015892	0.025672	0.023227	0.072467	0.023105	0.02483	0
Fortaleza	Ceará	NE	81323	0.084688	0.26161	0.079967	0.050291	0.056126	0.095347	0.011051	0.030227	0.049186	0.049172	0.063362	0.030288	0.030319	0.00772	0.004866	6.1e-05	0.009472	0.065622	0.001858	0.013831	0.002478	0.060887	0.043534	0.012047	0.054575	0.104604	0.041928	0.019424	0.11282	0.01106	0.020523	0.036319	0.061924	0.011697	0.013354	0.110235	0.015507	5.5e-05	0.002055	0.010002	0.026664	0.03129	0.081653	0.019195	0.02331	4.3e-05
Horizonte	Ceará	NE	501	0.069572	0.243479	0.078584	0.054652	0.06077	0.07867	0.011976	0.028942	0.049771	0.048771	0.063032	0.041766	0.035928	0.01497	0.006986	0	0.010978	0.075491	0.005988	0.011976	0.003992	0.060878	0.033932	0.006986	0.042914	0.125749	0.041916	0.017964	0.110778	0.00998	0.01497	0.042914	0.053892	0.017964	0.01996	0.093812	0.016966	0	0.000998	0.016966	0.021956	0.042914	0.082834	0.01996	0.020958	0
Iguatu	Ceará	NE	2604	0.08722	0.245477	0.081899	0.061082	0.054062	0.089311	0.010658	0.046292	0.056093	0.069544	0.054186	0.023559	0.02371	0.006144	0.003072	0	0.008535	0.053515	0.003264	0.014898	0.002304	0.058276	0.042084	0.014785	0.057	0.103643	0.040125	0.019663	0.101566	0.012289	0.021067	0.031441	0.070315	0.012404	0.020129	0.115113	0.020242	0.000192	0.002496	0.005568	0.031025	0.030104	0.076795	0.014908	0.019856	0
Itapajé	Ceará	NE	175	0.068571	0.288571	0.065714	0.054286	0.034286	0.071429	0.011429	0.02	0.02	0.048571	0.085714	0.062857	0.02	0	0.002857	0	0.011429	0.114286	0	0.011429	0.008571	0.085282	0.025714	0.002857	0.087727	0.088151	0.044993	0.008571	0.110041	0.017143	0.017143	0.044993	0.070414	0.022857	0.008571	0.096364	0.011429	0	0.002857	0.018719	0.04	0.028571	0.074286	0.008571	0.017143	0
Itapipoca	Ceará	NE	326	0.070552	0.266871	0.082822	0.059816	0.046012	0.099693	0.009202	0.03681	0.035276	0.050613	0.072086	0.033742	0.029141	0.01227	0.007669	0	0.006135	0.069018	0.001534	0.009202	0.001534	0.054834	0.032209	0.006135	0.064417	0.127882	0.029141	0.024777	0.110449	0.010736	0.026074	0.042945	0.071777	0.016871	0.009738	0.089717	0.016058	0	0	0.01227	0.030098	0.03681	0.060644	0.016871	0.019194	0
Juazeiro do Norte	Ceará	NE	12701	0.076162	0.251807	0.085565	0.054712	0.062244	0.088533	0.0101	0.030615	0.04836	0.068284	0.050514	0.025523	0.031597	0.009162	0.005629	0	0.013961	0.065797	0.001811	0.015786	0.002244	0.071864	0.04438	0.016533	0.059158	0.102171	0.039649	0.017671	0.106603	0.009791	0.020562	0.033593	0.050559	0.013129	0.022047	0.101905	0.021212	0.000394	0.002139	0.007702	0.026124	0.024856	0.076302	0.020377	0.026344	7.9e-05
Maracanaú	Ceará	NE	3138	0.080731	0.256513	0.075307	0.047305	0.060485	0.09587	0.011791	0.032466	0.045848	0.051257	0.067831	0.028347	0.03121	0.010676	0.007648	0.000319	0.010516	0.064818	0.001753	0.01624	0.00239	0.062664	0.040083	0.01211	0.056614	0.113473	0.038291	0.019576	0.105135	0.010994	0.020991	0.041052	0.066327	0.012588	0.015588	0.09863	0.015269	0.000159	0.001115	0.012588	0.022447	0.03123	0.079227	0.022108	0.023506	0
Maranguape	Ceará	NE	920	0.070652	0.259239	0.079348	0.052174	0.053804	0.102174	0.008152	0.032609	0.043478	0.055978	0.063587	0.033696	0.029348	0.011957	0.005978	0	0.007609	0.069565	0	0.017391	0.003261	0.04837	0.028261	0.008696	0.044022	0.138043	0.050543	0.013043	0.10163	0.014674	0.022283	0.03913	0.06087	0.007609	0.022826	0.096196	0.016848	0	0.00163	0.013587	0.032609	0.028804	0.083696	0.019565	0.028261	0
Massapê	Ceará	NE	139	0.104317	0.233813	0.068345	0.032374	0.071942	0.122302	0.003597	0.017986	0.05036	0.032374	0.097122	0.028777	0.02518	0.007194	0.007194	0	0.014388	0.064748	0	0.017986	0	0.053112	0.039568	0.010791	0.031137	0.132304	0.035971	0.010791	0.106962	0.014388	0.007194	0.057554	0.071942	0.003597	0.010791	0.110118	0.010791	0	0	0.003597	0.031137	0.021583	0.089373	0.035971	0.017986	0
Pacajus	Ceará	NE	447	0.079418	0.277405	0.082774	0.049217	0.048098	0.088367	0.010067	0.025727	0.057047	0.041387	0.077181	0.03915	0.030201	0.005593	0.008949	0	0.002237	0.061521	0	0.01566	0	0.057832	0.03915	0.010067	0.058956	0.097591	0.038918	0.016779	0.093522	0.017897	0.017897	0.024609	0.071169	0.012304	0.010067	0.134483	0.018621	0	0.002237	0.008949	0.024279	0.036913	0.098119	0.016779	0.025727	0
Pacatuba	Ceará	NE	534	0.066285	0.257394	0.069946	0.04199	0.067971	0.084895	0.005053	0.036517	0.041199	0.058772	0.075496	0.031652	0.040262	0.006554	0.003745	0	0.011236	0.067223	0.001873	0.026217	0.001873	0.06367	0.039326	0.005618	0.053371	0.108614	0.048689	0.016854	0.114232	0.004682	0.019663	0.033708	0.075843	0.014045	0.023408	0.088015	0.015918	0	0.000936	0.011236	0.034644	0.026217	0.073034	0.011236	0.041199	0
Quixadá	Ceará	NE	2763	0.078221	0.251065	0.079775	0.052827	0.066786	0.089994	0.010134	0.039665	0.048574	0.045254	0.058636	0.03141	0.033454	0.008505	0.004705	0.000181	0.013391	0.064959	0.001267	0.016243	0.002353	0.070937	0.042526	0.014296	0.05266	0.099168	0.038545	0.015201	0.104054	0.010677	0.025154	0.038907	0.062975	0.016649	0.013753	0.108035	0.012305	0	0.000905	0.011039	0.025697	0.034021	0.082338	0.020268	0.021354	0
Quixeramobim	Ceará	NE	861	0.089557	0.25405	0.089764	0.052062	0.065873	0.089098	0.009292	0.027643	0.038821	0.051103	0.047325	0.031254	0.029617	0.009292	0.000581	0	0.010453	0.078885	0.001742	0.016671	0.003484	0.057488	0.045294	0.016836	0.060395	0.094069	0.048198	0.009292	0.120782	0.011614	0.024968	0.037164	0.056906	0.019159	0.014512	0.102781	0.013937	0	0.003484	0.010453	0.025552	0.026132	0.076645	0.031354	0.017422	0
Russas	Ceará	NE	1830	0.101366	0.254918	0.083333	0.05847	0.060656	0.060383	0.009836	0.023497	0.051093	0.047814	0.089617	0.040164	0.037978	0.010109	0.004098	0	0.005464	0.046995	0.00082	0.012842	0.000546	0.070219	0.045355	0.012842	0.056557	0.092623	0.046175	0.017486	0.127322	0.013388	0.013661	0.031967	0.063661	0.006557	0.010109	0.12623	0.016393	0	0.00082	0.010929	0.016667	0.031421	0.08388	0.022678	0.012568	0
São Gonçalo do Amarante	Ceará	NE	394	0.076621	0.254168	0.10022	0.046412	0.057901	0.111201	0.008883	0.020305	0.043856	0.050244	0.05152	0.027051	0.02778	0.006345	0.002538	0	0.016497	0.065551	0.001269	0.014331	0	0.06599	0.041878	0.02665	0.056183	0.085128	0.038292	0.013959	0.142568	0.006345	0.015228	0.025381	0.067336	0.003807	0.017766	0.120694	0.008883	0	0	0.016497	0.011421	0.031081	0.058747	0.007614	0.027232	0
Sobral	Ceará	NE	3944	0.075153	0.263607	0.089598	0.043732	0.053991	0.102778	0.00786	0.025101	0.044476	0.043592	0.07274	0.031684	0.026617	0.009255	0.006339	0.00038	0.009492	0.073127	0.003423	0.013438	0.003296	0.060241	0.039363	0.009762	0.054789	0.10856	0.038754	0.016782	0.111149	0.006592	0.017952	0.04137	0.074994	0.008874	0.016046	0.115065	0.013184	0.000127	0.001554	0.010015	0.026206	0.026714	0.080343	0.018231	0.021149	0
Tianguá	Ceará	NE	572	0.088287	0.33479	0.058566	0.045455	0.045455	0.097028	0.018357	0.020979	0.045455	0.027972	0.061189	0.032343	0.032343	0.006119	0.002622	0	0.01486	0.051573	0.002622	0.013112	0.000874	0.059394	0.040176	0.006993	0.05507	0.139659	0.030594	0.021731	0.086522	0.009615	0.032301	0.041958	0.07162	0.013986	0.01049	0.110913	0.021853	0	0.002622	0.01049	0.021853	0.04458	0.079493	0.014773	0.013112	0
Viçosa do Ceará	Ceará	NE	122	0.094262	0.231202	0.07272	0.03939	0.04918	0.094937	0	0.053279	0.026704	0.040984	0.114016	0.016393	0.028689	0.008197	0.016393	0	0.016393	0.051945	0	0.032787	0	0.07377	0.04918	0.012295	0.045082	0.172131	0.012295	0.016393	0.086066	0.008197	0.057377	0.036885	0.081967	0	0.028689	0.061475	0.008197	0	0	0.020492	0.028689	0.032787	0.061475	0.016393	0.036885	0
Balsas	Maranhão	NE	177	0.094528	0.224085	0.09297	0.055735	0.044301	0.10452	0.00565	0.028249	0.053672	0.057838	0.050847	0.019774	0.042373	0.008475	0.00565	0	0.008475	0.067133	0	0.025424	0	0.042373	0.028249	0.008475	0.059322	0.10452	0.042373	0.033898	0.124294	0.002825	0.031073	0.022599	0.053672	0.025424	0.036723	0.121469	0.014124	0	0	0.00565	0.019774	0.031073	0.062147	0.014124	0.028249	0
Caxias	Maranhão	NE	781	0.065123	0.247763	0.07492	0.040636	0.066763	0.113228	0.010243	0.026248	0.030523	0.070183	0.066878	0.022153	0.038236	0.012164	0.012164	0	0.012804	0.063141	0	0.017636	0.001921	0.082586	0.039052	0.012804	0.050576	0.111396	0.03137	0.016645	0.107554	0.008323	0.018566	0.033931	0.06146	0.012804	0.024328	0.103713	0.019206	0.00064	0.00064	0.008963	0.021767	0.014725	0.076184	0.016005	0.036492	0
Imperatriz	Maranhão	NE	532	0.078944	0.248104	0.080824	0.036651	0.065788	0.090219	0.011278	0.030067	0.059202	0.066727	0.070482	0.021617	0.029135	0.007519	0.00188	0	0.014098	0.065784	0.00094	0.018797	0.00188	0.052632	0.041353	0.012218	0.047932	0.116541	0.040414	0.015977	0.095865	0.010338	0.020677	0.045113	0.055451	0.020677	0.017857	0.091165	0.021617	0	0.004699	0.009398	0.029135	0.025376	0.067669	0.022556	0.031955	0
Paço do Lumiar	Maranhão	NE	432	0.085589	0.245209	0.056653	0.039309	0.054398	0.116752	0.00463	0.024306	0.039309	0.060129	0.085608	0.032407	0.037037	0.010417	0.002315	0	0.020756	0.054336	0.001157	0.027778	0.001157	0.060645	0.039352	0.010417	0.041473	0.124128	0.03217	0.030093	0.127836	0.011574	0.018519	0.040311	0.060044	0.010417	0.022839	0.071639	0.018519	0.002315	0.003472	0.009259	0.035661	0.019676	0.062227	0.028935	0.028675	0
São José de Ribamar	Maranhão	NE	749	0.078104	0.256342	0.076769	0.038718	0.056075	0.085447	0.007343	0.030708	0.042056	0.062083	0.086115	0.020027	0.032043	0.010013	0.008011	0	0.008011	0.073431	0.002003	0.0247	0.002003	0.060748	0.045394	0.008678	0.048064	0.134846	0.030708	0.020694	0.098131	0.010013	0.018692	0.05474	0.062083	0.012016	0.016021	0.072764	0.022029	0.000668	0.001335	0.012684	0.029372	0.03004	0.076769	0.022029	0.03004	0
Timon	Maranhão	NE	1807	0.067791	0.2565	0.074709	0.039568	0.061427	0.088544	0.008854	0.024903	0.041228	0.076645	0.076369	0.026563	0.029053	0.013282	0.006918	0	0.013835	0.065301	0.001107	0.022966	0.004427	0.062811	0.037908	0.010238	0.052297	0.108467	0.041228	0.018262	0.112617	0.008578	0.014388	0.040398	0.059767	0.008301	0.025733	0.101826	0.020753	0	0.00083	0.012728	0.022136	0.022966	0.068622	0.024073	0.032927	0
Bayeux	Paraíba	NE	1291	0.081244	0.246509	0.075993	0.037628	0.065198	0.08557	0.01007	0.022698	0.045805	0.064001	0.051943	0.033188	0.03047	0.011747	0.007359	0.001162	0.018203	0.079443	0	0.020914	0.003486	0.076621	0.037055	0.014717	0.047951	0.108627	0.036342	0.012701	0.100914	0.016654	0.022802	0.034014	0.060279	0.010457	0.027069	0.093621	0.01892	0.000387	0.002324	0.013943	0.027457	0.026293	0.073066	0.016266	0.037863	0
Cabedelo	Paraíba	NE	984	0.086783	0.253995	0.076577	0.049152	0.06348	0.098872	0.016654	0.02439	0.042579	0.058396	0.053694	0.035508	0.027286	0.011537	0.002541	0	0.013966	0.063372	0.002541	0.014736	0.001524	0.06956	0.044695	0.016207	0.057878	0.096975	0.037528	0.022278	0.092408	0.014168	0.011687	0.035061	0.060421	0.015244	0.020833	0.08782	0.018801	0	0.004065	0.007622	0.028455	0.029919	0.086273	0.018801	0.037019	0
Cajazeiras	Paraíba	NE	183	0.084606	0.220874	0.065455	0.065574	0.057242	0.106333	0.021858	0.035519	0.068076	0.05998	0.062717	0.021858	0.032787	0.016393	0.005464	0	0	0.065574	0	0.008197	0	0.062842	0.046448	0.008197	0.068306	0.07377	0.027322	0.021858	0.120219	0.010929	0.02459	0.038251	0.062842	0.008197	0.010929	0.112022	0.013661	0	0.002732	0.002732	0.035519	0.02459	0.081967	0.016393	0.040984	0
Campina Grande	Paraíba	NE	14526	0.086327	0.257139	0.079049	0.05104	0.055829	0.100076	0.009936	0.033865	0.049159	0.056654	0.048576	0.029523	0.032346	0.008764	0.004352	0.000103	0.012257	0.064279	0.002524	0.013139	0.002375	0.076823	0.04303	0.014232	0.05935	0.089918	0.035101	0.024468	0.099886	0.012296	0.019561	0.03335	0.057276	0.011687	0.017214	0.106031	0.0185	6.9e-05	0.002444	0.006987	0.020533	0.032282	0.091571	0.018504	0.027673	3.4e-05
Guarabira	Paraíba	NE	239	0.098326	0.248954	0.077406	0.043933	0.064854	0.100418	0.006276	0.035565	0.054393	0.058577	0.056485	0.037657	0.027197	0.004184	0.002092	0.002092	0.016736	0.052301	0.004184	0.006276	0.002092	0.07929	0.04323	0.012552	0.054393	0.097812	0.023013	0.008368	0.105897	0.013835	0.016736	0.046025	0.049898	0.018828	0.029289	0.097639	0.020921	0	0.002092	0.01046	0.045689	0.031381	0.075314	0.016736	0.018828	0
João Pessoa	Paraíba	NE	28936	0.085879	0.252635	0.079587	0.052591	0.056215	0.098969	0.009697	0.031578	0.0508	0.0559	0.049664	0.031852	0.030179	0.009018	0.004703	0.000276	0.012789	0.067866	0.001838	0.013529	0.002678	0.074208	0.040902	0.013425	0.058408	0.096597	0.035758	0.019181	0.107547	0.012005	0.023708	0.035085	0.056569	0.011891	0.017766	0.100507	0.016927	0.000276	0.003179	0.008884	0.026475	0.027992	0.080638	0.016844	0.029604	1.7e-05
Patos	Paraíba	NE	1063	0.091251	0.265757	0.06397	0.056444	0.049859	0.117121	0.008467	0.030574	0.067733	0.047507	0.047037	0.024459	0.034337	0.007526	0.004704	0	0.010348	0.056444	0	0.014581	0.001881	0.071434	0.046539	0.01223	0.059662	0.091701	0.033396	0.030574	0.102911	0.009878	0.032455	0.036655	0.056388	0.01171	0.0127	0.100608	0.019254	0	0.000941	0.004233	0.023518	0.039479	0.065803	0.014111	0.038067	0
Santa Rita	Paraíba	NE	1033	0.07212	0.253146	0.079864	0.04211	0.061471	0.089061	0.005808	0.035818	0.045015	0.073088	0.049855	0.028074	0.025653	0.008712	0.009681	0.000484	0.014037	0.085673	0.000968	0.015005	0.004356	0.065716	0.033293	0.011133	0.056891	0.116408	0.036205	0.013553	0.106291	0.00726	0.017425	0.040174	0.055919	0.012101	0.025035	0.086468	0.019845	0	0.00242	0.008712	0.025035	0.024132	0.073881	0.020329	0.048365	0
Sapé	Paraíba	NE	255	0.072549	0.241176	0.072549	0.047059	0.056863	0.111765	0.013725	0.013725	0.037255	0.047059	0.058824	0.023529	0.045098	0.019608	0.009804	0	0.021569	0.088235	0.001961	0.013725	0.003922	0.058742	0.041062	0.007843	0.060784	0.119362	0.035162	0.019608	0.144895	0.003922	0.013725	0.035162	0.047059	0.009804	0.009804	0.084084	0.011765	0	0	0.007843	0.021569	0.031373	0.078431	0.027451	0.031373	0
Abreu e Lima	Pernambuco	NE	781	0.077465	0.253521	0.077465	0.048015	0.075544	0.091549	0.010243	0.025608	0.041613	0.069142	0.040333	0.023688	0.03265	0.007682	0.008963	0	0.014725	0.071063	0.003201	0.023688	0.003841	0.074569	0.038412	0.016005	0.048363	0.107812	0.034312	0.013837	0.101828	0.008323	0.015365	0.023688	0.046975	0.016005	0.027529	0.083686	0.026248	0	0.003201	0.009603	0.022871	0.026573	0.088645	0.015365	0.035473	0
Arcoverde	Pernambuco	NE	1451	0.099111	0.247245	0.072941	0.063332	0.05434	0.087419	0.007926	0.022696	0.045756	0.074322	0.04583	0.032323	0.035399	0.006892	0.004135	0	0.018898	0.054905	0.001378	0.02097	0.002412	0.066467	0.04198	0.016511	0.053048	0.108115	0.038223	0.019297	0.094664	0.014473	0.018263	0.024466	0.042705	0.011716	0.022009	0.105711	0.02548	0	0.002068	0.005513	0.031702	0.027223	0.083335	0.017547	0.026439	0
Bezerros	Pernambuco	NE	685	0.122538	0.242187	0.077282	0.045985	0.060551	0.105034	0.021168	0.027737	0.041582	0.063473	0.036416	0.026241	0.029131	0.005839	0.00365	0	0.010949	0.059107	0.00146	0.016788	0.00219	0.077372	0.044526	0.028467	0.059124	0.10365	0.032847	0.018978	0.091971	0.015328	0.013869	0.029927	0.037956	0.023358	0.016788	0.105839	0.020438	0.00073	0.00365	0.006569	0.045985	0.024818	0.079562	0.021898	0.022628	0
Cabo de Santo Agostinho	Pernambuco	NE	1137	0.074917	0.233394	0.077997	0.053234	0.080439	0.084416	0.008355	0.028434	0.049731	0.084351	0.039661	0.026193	0.02711	0.013193	0.006596	0.00044	0.014732	0.056638	0.003518	0.026669	0.002639	0.065182	0.038622	0.012506	0.051683	0.121512	0.042536	0.011434	0.086687	0.008508	0.020229	0.031215	0.050038	0.01715	0.022243	0.096054	0.023747	0	0.003078	0.004837	0.027543	0.021988	0.073769	0.021169	0.036537	0
Camaragibe	Pernambuco	NE	1778	0.083233	0.244063	0.078448	0.04639	0.06889	0.101222	0.007593	0.029523	0.041335	0.069169	0.039646	0.029525	0.030931	0.015458	0.006749	0.000844	0.017998	0.062704	0.002812	0.020529	0.002812	0.070415	0.043227	0.015467	0.052972	0.109665	0.039001	0.010686	0.095089	0.010602	0.018505	0.029209	0.054491	0.014839	0.019123	0.099415	0.021886	0	0.003937	0.012092	0.026434	0.027278	0.077037	0.018223	0.034557	0
Carpina	Pernambuco	NE	1260	0.067848	0.246778	0.079752	0.04999	0.073402	0.08173	0.006325	0.03373	0.044823	0.079345	0.034907	0.027772	0.03055	0.012698	0.009921	0.000397	0.018254	0.069827	0.004365	0.025	0.002381	0.065873	0.039286	0.01627	0.056349	0.103571	0.047222	0.021429	0.089683	0.017063	0.020238	0.025397	0.05	0.013889	0.030159	0.088095	0.020635	0	0.003175	0.012302	0.020238	0.021825	0.086111	0.017857	0.040476	0
Caruaru	Pernambuco	NE	6062	0.084991	0.25324	0.086137	0.052998	0.058772	0.099822	0.015501	0.025885	0.04172	0.06001	0.044836	0.032816	0.033641	0.006751	0.004454	8.2e-05	0.013603	0.063723	0.003299	0.014911	0.002227	0.077814	0.040565	0.022668	0.056389	0.103775	0.040769	0.021295	0.097015	0.010887	0.015072	0.028597	0.042574	0.018463	0.02052	0.093014	0.017033	8.2e-05	0.003464	0.008794	0.030582	0.029742	0.088391	0.016517	0.026075	0
Escada	Pernambuco	NE	159	0.072327	0.22327	0.050314	0.066038	0.059748	0.110063	0.012579	0.040881	0.056604	0.069182	0.053459	0.018868	0.040881	0.015723	0.009434	0	0.012579	0.04717	0	0.037736	0.003145	0.065535	0.031447	0.012579	0.046829	0.144296	0.062893	0.025157	0.097136	0.006289	0.022013	0.025157	0.034591	0.009434	0.044025	0.106599	0.015723	0	0.006289	0.006289	0.015723	0.030958	0.062893	0.012579	0.022013	0
Garanhuns	Pernambuco	NE	5344	0.078079	0.253965	0.085004	0.050562	0.059036	0.100402	0.013138	0.027188	0.04197	0.066974	0.04448	0.032306	0.039882	0.00524	0.00552	0	0.017669	0.058375	0.00262	0.014315	0.001684	0.071825	0.043308	0.016459	0.060985	0.099798	0.036655	0.019835	0.091946	0.008701	0.022724	0.028897	0.039283	0.022256	0.018234	0.106995	0.016452	0.000281	0.002526	0.007204	0.030212	0.027971	0.089503	0.019642	0.029096	0
Goiana	Pernambuco	NE	1696	0.061001	0.226281	0.081871	0.052167	0.077192	0.087508	0.007326	0.024735	0.042427	0.086922	0.054218	0.028007	0.033281	0.014717	0.004422	0	0.016215	0.075122	0.002948	0.020047	0.002948	0.078114	0.034778	0.013561	0.049228	0.115844	0.041564	0.014735	0.103761	0.006486	0.015319	0.033306	0.050409	0.010024	0.028302	0.096979	0.017089	0	0.002064	0.00855	0.022402	0.021812	0.078704	0.019744	0.031545	0.00059
Gravatá	Pernambuco	NE	440	0.108273	0.258396	0.070989	0.048075	0.059091	0.099302	0.010227	0.036772	0.045043	0.044627	0.053813	0.032955	0.029545	0.001136	0.005895	0	0.011364	0.060349	0.003409	0.006818	0.001136	0.070301	0.053409	0.022727	0.05891	0.106611	0.045109	0.020455	0.081685	0.0125	0.017045	0.026136	0.033943	0.018182	0.019318	0.114288	0.014773	0	0.002273	0.006818	0.025	0.035227	0.081551	0.016781	0.028236	0
Igarassu	Pernambuco	NE	494	0.088057	0.228745	0.080972	0.045547	0.09413	0.07085	0.006073	0.02834	0.039474	0.091093	0.04251	0.024291	0.024291	0.010121	0.010121	0	0.018219	0.071862	0	0.022267	0.003036	0.052632	0.047571	0.01417	0.046559	0.101215	0.043522	0.012146	0.100202	0.012146	0.012146	0.029352	0.048583	0.020243	0.029352	0.09413	0.020243	0	0.001012	0.010121	0.019231	0.037449	0.073887	0.021255	0.046559	0
Ipojuca	Pernambuco	NE	335	0.074627	0.225373	0.076119	0.047761	0.107463	0.080597	0.008955	0.026866	0.043284	0.09403	0.037313	0.01194	0.041791	0.010448	0.01194	0	0.014925	0.055224	0	0.028358	0.002985	0.065672	0.034328	0.008955	0.061194	0.125373	0.029851	0.01194	0.077612	0.01791	0.008955	0.022388	0.044776	0.010448	0.041791	0.097015	0.026866	0	0.001493	0.007463	0.035821	0.029851	0.068657	0.019403	0.031343	0
Jaboatão dos Guararapes	Pernambuco	NE	7835	0.076962	0.250989	0.084493	0.052265	0.065029	0.094895	0.010274	0.026356	0.045565	0.069496	0.042757	0.031142	0.029355	0.008807	0.007211	0.000255	0.014231	0.064263	0.003382	0.019719	0.002553	0.069368	0.035609	0.016018	0.056286	0.105233	0.038354	0.018571	0.101978	0.010849	0.017486	0.028845	0.046139	0.015061	0.021378	0.102234	0.022846	0.000128	0.002808	0.007913	0.028143	0.027696	0.074154	0.017103	0.03529	0
Limoeiro	Pernambuco	NE	418	0.095694	0.247608	0.069378	0.044258	0.08134	0.111244	0.009569	0.037081	0.045455	0.063397	0.034689	0.022727	0.02512	0.010766	0.011962	0	0.005981	0.058612	0.005981	0.016746	0.002392	0.061005	0.050239	0.008373	0.053828	0.090909	0.050239	0.019139	0.094498	0.01555	0.01555	0.029904	0.055024	0.010766	0.020335	0.118421	0.011962	0	0.001196	0.026316	0.019139	0.029904	0.099282	0.01555	0.032297	0
Olinda	Pernambuco	NE	6528	0.08329	0.246095	0.082013	0.052474	0.066074	0.092971	0.009727	0.027376	0.045057	0.067518	0.041083	0.029511	0.035203	0.012331	0.006434	0.000153	0.013687	0.063492	0.004366	0.0173	0.002604	0.068084	0.040242	0.014732	0.061498	0.10573	0.037699	0.016651	0.096699	0.011775	0.018388	0.029863	0.047043	0.016973	0.024662	0.106474	0.020258	0.00046	0.002528	0.00697	0.027513	0.027196	0.077872	0.01685	0.030294	0
Palmares	Pernambuco	NE	195	0.069231	0.228205	0.082051	0.041026	0.069231	0.058974	0.020513	0.030769	0.035897	0.082051	0.076923	0.038462	0.033333	0.012821	0.005128	0	0.015385	0.082051	0.002564	0.015385	0	0.104649	0.030769	0.011064	0.075055	0.084044	0.025641	0.033333	0.109331	0.002564	0.030769	0.038462	0.044349	0.015385	0.024367	0.084044	0.017949	0	0.007692	0.002564	0.017949	0.012821	0.085489	0.017949	0.030769	0
Paulista	Pernambuco	NE	4093	0.077009	0.250062	0.081003	0.051471	0.064614	0.088421	0.011818	0.028754	0.044853	0.071454	0.042192	0.030576	0.031773	0.010594	0.006108	0.000244	0.013748	0.065824	0.003054	0.020849	0.003543	0.068654	0.038358	0.014781	0.057537	0.106157	0.039335	0.015514	0.101393	0.010261	0.018202	0.029685	0.050574	0.01527	0.021011	0.104569	0.022477	0.000244	0.002932	0.009651	0.024676	0.023088	0.080992	0.018935	0.036526	0
Petrolina	Pernambuco	NE	2954	0.091586	0.248527	0.088869	0.052964	0.055754	0.085339	0.011171	0.029544	0.048122	0.062782	0.045935	0.03709	0.03366	0.010833	0.005416	0.000169	0.010494	0.061593	0.001693	0.013956	0.001862	0.057959	0.044296	0.01151	0.05262	0.093485	0.044264	0.019127	0.114504	0.017095	0.019701	0.029676	0.040475	0.012626	0.017152	0.112297	0.024964	0.000339	0.000846	0.006432	0.027938	0.02734	0.082216	0.015911	0.033206	0.000173
Recife	Pernambuco	NE	41085	0.08462	0.249704	0.083621	0.057114	0.06146	0.096246	0.010807	0.029054	0.047227	0.059013	0.042597	0.033066	0.030973	0.008809	0.005013	0.00011	0.01342	0.063265	0.002714	0.016317	0.002165	0.071094	0.041731	0.015008	0.058325	0.098708	0.038636	0.01891	0.105342	0.011807	0.019256	0.027379	0.046857	0.014366	0.017761	0.108209	0.020008	0.000158	0.002738	0.007436	0.026441	0.028855	0.086787	0.017742	0.028853	7.3e-05
São Lourenço da Mata	Pernambuco	NE	809	0.074704	0.237059	0.075921	0.05245	0.072868	0.0981	0.007417	0.032756	0.046227	0.061041	0.037701	0.026576	0.030284	0.011634	0.006799	0	0.016687	0.072208	0.008035	0.026576	0.003708	0.063041	0.035229	0.016687	0.055624	0.114339	0.037083	0.013597	0.101978	0.009889	0.017923	0.029048	0.051916	0.012979	0.020396	0.090235	0.025958	0	0.002472	0.016069	0.024104	0.039555	0.079728	0.016069	0.036465	0
Serra Talhada	Pernambuco	NE	819	0.074537	0.248897	0.075538	0.057789	0.070032	0.083439	0.008547	0.018752	0.064397	0.057648	0.038362	0.048759	0.034691	0.010379	0.005495	0	0.010989	0.07009	0.001221	0.016718	0	0.068227	0.038971	0.009768	0.054335	0.090149	0.040244	0.019536	0.084078	0.006105	0.009768	0.041514	0.037851	0.010379	0.029239	0.125531	0.02381	0	0.000611	0.006716	0.03647	0.031074	0.06578	0.024266	0.045045	0
Timbaúba	Pernambuco	NE	1380	0.067754	0.225725	0.061957	0.044203	0.078623	0.08913	0.003986	0.035507	0.041304	0.08442	0.052174	0.031159	0.026087	0.015217	0.006159	0.000362	0.018841	0.082246	0.005797	0.023188	0.006159	0.069565	0.033333	0.012319	0.055797	0.113768	0.030072	0.01413	0.090942	0.008333	0.012319	0.038043	0.060145	0.014855	0.027536	0.093841	0.021739	0	0.000725	0.00942	0.028623	0.028261	0.088406	0.022464	0.037319	0
Vitória de Santo Antão	Pernambuco	NE	2166	0.073649	0.239038	0.082955	0.054174	0.069033	0.097193	0.011475	0.033444	0.036342	0.073649	0.0431	0.029716	0.030702	0.010388	0.007618	0	0.017082	0.063786	0.004386	0.018095	0.001847	0.074561	0.034395	0.017544	0.056787	0.105494	0.036011	0.016159	0.097415	0.012235	0.018006	0.025162	0.050785	0.012235	0.025162	0.093952	0.02193	0	0.004617	0.009695	0.021237	0.025392	0.078486	0.020545	0.041782	0
Barras	Piauí	NE	476	0.068231	0.278138	0.057719	0.04198	0.072457	0.102834	0.018908	0.014706	0.040966	0.046151	0.056695	0.020937	0.031513	0.022059	0.008403	0	0.013655	0.073423	0.003151	0.02521	0.002101	0.069328	0.043067	0.007353	0.037815	0.12395	0.028361	0.028361	0.096639	0.005252	0.032563	0.030462	0.064076	0.015756	0.02416	0.115546	0.027311	0	0.00105	0.009454	0.021008	0.012605	0.064076	0.026261	0.035714	0
Campo Maior	Piauí	NE	3686	0.069723	0.254612	0.072029	0.039881	0.071351	0.081118	0.00841	0.0293	0.042458	0.071622	0.068774	0.029164	0.033505	0.009495	0.016278	0	0.012208	0.061313	0.001492	0.024959	0.002306	0.054483	0.044835	0.006441	0.053378	0.113473	0.042479	0.024432	0.10337	0.009982	0.020209	0.02789	0.06082	0.011394	0.018004	0.110016	0.017499	0	0.000136	0.013064	0.030828	0.02827	0.063757	0.017052	0.034613	0
Parnaíba	Piauí	NE	3244	0.064351	0.266303	0.078733	0.049524	0.061989	0.099394	0.008323	0.024507	0.039078	0.050607	0.083001	0.026271	0.030093	0.008858	0.004624	0	0.009786	0.063831	0.002004	0.020294	0.003391	0.063502	0.041615	0.010327	0.051171	0.114982	0.036221	0.017417	0.118372	0.007398	0.020345	0.041153	0.077836	0.011406	0.012793	0.097102	0.020191	0.000308	0.001541	0.013872	0.028052	0.026202	0.067972	0.024353	0.024507	0.000154
Picos	Piauí	NE	4610	0.07851	0.231722	0.096325	0.062439	0.039912	0.091748	0.016651	0.025847	0.043277	0.07481	0.057873	0.026803	0.048782	0.006616	0.004688	0	0.007158	0.05584	0.001844	0.012629	0.008463	0.062029	0.043433	0.016383	0.052025	0.104694	0.037638	0.012088	0.123573	0.01114	0.012246	0.029536	0.067109	0.010239	0.013015	0.092213	0.032495	0.000108	0.002061	0.006867	0.02492	0.035831	0.079974	0.0166	0.02267	0
Teresina	Piauí	NE	36300	0.0725	0.258424	0.079051	0.045519	0.061661	0.093727	0.009885	0.027103	0.044887	0.063988	0.061957	0.026348	0.032407	0.009949	0.007556	4.1e-05	0.0124	0.0653	0.001736	0.019096	0.003932	0.062596	0.044658	0.011414	0.052815	0.109089	0.036908	0.020183	0.112626	0.009959	0.019018	0.036849	0.056908	0.011959	0.018441	0.104745	0.018207	9.6e-05	0.001625	0.01082	0.026779	0.027599	0.073632	0.019043	0.029652	4.1e-05
Açu	Rio Grande do Norte	NE	116	0.072334	0.230207	0.088977	0.043103	0.085788	0.118145	0.008621	0.017241	0.030172	0.021552	0.058367	0.017241	0.051724	0.025862	0.008621	0	0.017241	0.067137	0	0.008621	0.00431	0.056034	0.038793	0.00431	0.073276	0.125	0.043103	0.025862	0.116379	0.017241	0.025862	0.012931	0.047414	0.008621	0.00431	0.12931	0.030172	0	0.00431	0	0.025862	0.038793	0.086207	0.00431	0.030172	0
Parnamirim	Rio Grande do Norte	NE	7908	0.088943	0.256037	0.078362	0.049425	0.054285	0.104274	0.012896	0.025791	0.049934	0.051226	0.05422	0.032938	0.031936	0.007146	0.005943	0.00019	0.008725	0.062756	0.001328	0.014517	0.002276	0.064887	0.043404	0.013455	0.054327	0.094674	0.037605	0.023029	0.103761	0.016131	0.024351	0.031981	0.052975	0.011147	0.014518	0.11356	0.018233	0.000569	0.00177	0.009277	0.027631	0.028791	0.084205	0.021083	0.028179	6.3e-05
Macaíba	Rio Grande do Norte	NE	760	0.090789	0.244079	0.076974	0.043421	0.059868	0.108553	0.015789	0.020395	0.040132	0.055263	0.054605	0.021711	0.033553	0.014474	0.005921	0	0.017105	0.073684	0.000658	0.021053	0.001974	0.071053	0.042105	0.011184	0.055921	0.102632	0.034868	0.017105	0.113816	0.009868	0.028947	0.036184	0.059868	0.011184	0.015789	0.093421	0.023026	0	0.003289	0.009211	0.033553	0.029605	0.067105	0.020395	0.036842	0
Mossoró	Rio Grande do Norte	NE	3408	0.090392	0.246652	0.083083	0.04571	0.059066	0.092827	0.012554	0.026585	0.049325	0.046845	0.057027	0.037495	0.038998	0.006749	0.004695	0	0.011376	0.062814	0.00088	0.019613	0.002494	0.066534	0.040131	0.013475	0.063874	0.097286	0.036926	0.027399	0.117375	0.020508	0.023138	0.032109	0.052891	0.012911	0.014482	0.109915	0.016559	0.000147	0.001761	0.008363	0.020949	0.032518	0.075189	0.016872	0.019513	0.000147
Natal	Rio Grande do Norte	NE	41169	0.087524	0.255942	0.077376	0.049382	0.057551	0.104603	0.01262	0.024648	0.049846	0.053016	0.052343	0.033141	0.033521	0.008511	0.005772	0.000194	0.009772	0.064274	0.00153	0.014004	0.002575	0.066389	0.04412	0.012505	0.056238	0.094624	0.037805	0.022561	0.108229	0.014999	0.025801	0.032363	0.053609	0.010946	0.014828	0.108854	0.018672	0.000316	0.002235	0.009036	0.029243	0.029281	0.078556	0.019971	0.029214	9.7e-05
São Gonçalo do Amarante	Rio Grande do Norte	NE	1336	0.078219	0.248877	0.079341	0.05015	0.066617	0.09244	0.008234	0.026572	0.04753	0.063623	0.0625	0.02994	0.029192	0.008608	0.007111	0.000374	0.012725	0.066243	0.001871	0.017964	0.001871	0.069237	0.037425	0.009356	0.049775	0.093563	0.041168	0.023578	0.117141	0.014222	0.022829	0.038548	0.058383	0.009731	0.01759	0.105539	0.018338	0.000374	0.003743	0.011602	0.031063	0.026572	0.072231	0.015719	0.028069	0
Aracaju	Sergipe	NE	15422	0.08128	0.248077	0.088604	0.053175	0.064966	0.084974	0.010083	0.027334	0.050738	0.073991	0.03713	0.030925	0.029696	0.010565	0.007376	0	0.012883	0.061127	0.002918	0.020516	0.002432	0.075085	0.041628	0.015205	0.052294	0.105755	0.048371	0.015108	0.10556	0.010407	0.01501	0.030605	0.042665	0.011898	0.018835	0.115708	0.024348	0.000292	0.002821	0.006549	0.026779	0.020587	0.07113	0.018707	0.031221	0.000162
Estância	Sergipe	NE	659	0.064684	0.251113	0.087489	0.048269	0.065786	0.089101	0.007587	0.028616	0.04293	0.076139	0.038173	0.028073	0.027853	0.015175	0.013657	0	0.015933	0.059818	0.002276	0.028616	0.003035	0.064435	0.041562	0.013446	0.056082	0.112884	0.052352	0.012679	0.100577	0.009105	0.015175	0.031108	0.037085	0.010622	0.027314	0.104454	0.033384	0.000759	0.000759	0.007587	0.024145	0.020332	0.063562	0.022003	0.030127	0
Itabaiana	Sergipe	NE	3160	0.081808	0.236672	0.105816	0.041062	0.056995	0.097393	0.01563	0.030755	0.053847	0.077827	0.032734	0.036044	0.036358	0.004905	0.006962	0	0.010713	0.050943	0.006804	0.013727	0.000791	0.07943	0.039399	0.011551	0.051899	0.096994	0.050316	0.00981	0.127215	0.007595	0.020253	0.041297	0.030063	0.011076	0.016297	0.147626	0.019304	0.000316	0.001899	0.002848	0.022943	0.026582	0.066772	0.018038	0.02769	0
Lagarto	Sergipe	NE	4373	0.0731	0.253179	0.088863	0.043964	0.066122	0.104953	0.008918	0.026248	0.050581	0.080636	0.040415	0.029189	0.024686	0.00869	0.005222	0	0.013721	0.057321	0.002058	0.019843	0.001029	0.068321	0.032793	0.014521	0.053597	0.103269	0.064092	0.013238	0.118354	0.006517	0.012335	0.033469	0.051649	0.013594	0.018161	0.100542	0.026278	0.001143	0.001143	0.005488	0.034499	0.01882	0.05598	0.019992	0.026964	0
Nossa Senhora do Socorro	Sergipe	NE	1702	0.069284	0.233879	0.080389	0.047284	0.076591	0.078339	0.009344	0.027276	0.050172	0.086596	0.043449	0.026393	0.034647	0.017333	0.01322	0	0.016451	0.056054	0.003408	0.026122	0.002644	0.062627	0.036099	0.01322	0.057245	0.108257	0.038969	0.013697	0.103494	0.007344	0.013992	0.032724	0.040785	0.013401	0.028496	0.105142	0.025045	0.000588	0.000588	0.005875	0.019389	0.020858	0.073939	0.021445	0.041225	0
São Cristóvão	Sergipe	NE	1181	0.060529	0.225396	0.0843	0.056175	0.072075	0.092669	0.012278	0.021453	0.045912	0.089736	0.036125	0.026672	0.030059	0.013789	0.009314	0	0.016935	0.068618	0.00219	0.026739	0.00381	0.063797	0.040118	0.013548	0.057905	0.123014	0.054589	0.014395	0.095532	0.006774	0.013971	0.030483	0.03722	0.013548	0.023285	0.098033	0.026199	0.000847	0.002964	0.006351	0.026672	0.017782	0.070888	0.023063	0.043184	0
Cruzeiro do Sul	Acre	NO	1271	0.069448	0.269363	0.079304	0.040444	0.054538	0.09426	0.009441	0.040838	0.04349	0.064271	0.07098	0.026696	0.025964	0.007868	0.003541	0	0.008655	0.077354	0	0.008655	0.002754	0.055333	0.040339	0.010228	0.051068	0.12051	0.036983	0.019276	0.111065	0.008261	0.029386	0.048742	0.062882	0.014847	0.025109	0.088973	0.015637	0	0.00236	0.017703	0.015342	0.021165	0.081195	0.017309	0.027017	0
Rio Branco	Acre	NO	3693	0.081964	0.263392	0.074064	0.045039	0.053252	0.09666	0.009342	0.026782	0.044098	0.057739	0.070684	0.029063	0.02921	0.010126	0.006418	0	0.010561	0.072777	0.001219	0.013675	0.002572	0.062032	0.042042	0.01205	0.04882	0.111983	0.038528	0.02009	0.118121	0.009711	0.018346	0.041771	0.058816	0.010183	0.017578	0.102983	0.015841	0	0.00176	0.013346	0.021508	0.023423	0.082564	0.021333	0.024724	0.000135
Macapá	Amapá	NO	20909	0.059205	0.256596	0.063727	0.039492	0.047742	0.146519	0.007203	0.023788	0.037627	0.049614	0.101014	0.023484	0.027278	0.010524	0.003992	4.8e-05	0.008059	0.07384	0.001339	0.015266	0.001387	0.049154	0.037382	0.007289	0.050317	0.108837	0.027215	0.016173	0.148505	0.006374	0.013545	0.069712	0.069129	0.010132	0.012115	0.080091	0.017974	9.6e-05	0.00153	0.016649	0.023126	0.020576	0.079051	0.039493	0.025838	9.6e-05
Santana	Amapá	NO	4370	0.062357	0.252403	0.060069	0.036728	0.044737	0.150915	0.008352	0.0254	0.038558	0.047368	0.109382	0.019794	0.025629	0.010755	0.003661	0.000343	0.009039	0.078604	0.001373	0.013043	0.001487	0.043474	0.036954	0.00526	0.045765	0.115323	0.027002	0.015787	0.142897	0.008924	0.015787	0.079169	0.078482	0.008581	0.010641	0.082829	0.016934	0	0.001831	0.014645	0.025055	0.016818	0.073907	0.037984	0.020937	0.000114
Manaus	Amazonas	NO	30038	0.065482	0.270553	0.062335	0.040029	0.045133	0.139297	0.007596	0.024567	0.037786	0.044111	0.10491	0.023552	0.025442	0.007608	0.003795	0	0.007641	0.071578	0.001498	0.013586	0.001731	0.050757	0.033251	0.010235	0.045411	0.106869	0.032048	0.01484	0.144339	0.007882	0.015338	0.071338	0.075438	0.009398	0.012668	0.086124	0.014134	0.000134	0.001964	0.019194	0.020959	0.023028	0.07957	0.038808	0.022343	0.000316
Abaetetuba	Pará	NO	1101	0.062352	0.24345	0.05747	0.045163	0.053608	0.161936	0.006812	0.030198	0.040874	0.049801	0.101354	0.016631	0.023022	0.009537	0.001362	0.000454	0.007266	0.062288	0.004087	0.015895	0.001362	0.05035	0.023161	0.00545	0.042165	0.074355	0.027248	0.019074	0.145033	0.001817	0.015356	0.074355	0.065734	0.012617	0.01317	0.103304	0.029422	0	0.001362	0.014078	0.028967	0.019982	0.088924	0.037616	0.019458	0
Altamira	Pará	NO	1107	0.076784	0.255194	0.074526	0.048329	0.042005	0.104336	0.012647	0.030262	0.056459	0.063686	0.067299	0.025294	0.031165	0.009485	0.004065	0	0.011292	0.067299	0.00271	0.015357	0.001807	0.062782	0.039747	0.014453	0.055104	0.110659	0.035682	0.01626	0.126016	0.009033	0.019422	0.03794	0.043812	0.009033	0.020325	0.108401	0.017615	0.000452	0.000452	0.013098	0.028907	0.023035	0.074526	0.026649	0.0271	0.000452
Ananindeua	Pará	NO	12277	0.057002	0.26072	0.064278	0.039189	0.051513	0.128176	0.006834	0.031424	0.041747	0.049119	0.100661	0.027023	0.026119	0.00896	0.00395	4.1e-05	0.009204	0.076546	0.001711	0.013426	0.001507	0.053645	0.03551	0.009341	0.048264	0.105302	0.029825	0.017561	0.139055	0.006745	0.01602	0.066556	0.072034	0.010745	0.012767	0.088744	0.016885	0.000329	0.001548	0.01827	0.021931	0.023087	0.077475	0.034222	0.023319	4.1e-05
Barcarena	Pará	NO	982	0.058283	0.254548	0.066217	0.033096	0.048997	0.147893	0.008656	0.02444	0.046334	0.049587	0.091798	0.021894	0.027495	0.010218	0.006619	0.001018	0.011202	0.072475	0.001527	0.012729	0.000509	0.053971	0.039715	0.009165	0.044297	0.090631	0.035642	0.022912	0.123218	0.005092	0.007637	0.071792	0.071792	0.015784	0.01833	0.08554	0.021385	0	0.000509	0.021894	0.02444	0.017821	0.087067	0.031059	0.026477	0
Belém	Pará	NO	53110	0.065777	0.25573	0.06899	0.042028	0.049377	0.131275	0.00758	0.030779	0.040493	0.0469	0.095917	0.026141	0.027683	0.008004	0.00443	8.5e-05	0.008493	0.071449	0.001729	0.013267	0.00225	0.054467	0.036027	0.009408	0.048053	0.099324	0.033195	0.018163	0.140379	0.007688	0.016903	0.063915	0.066866	0.011757	0.012952	0.092024	0.016167	0.00016	0.001327	0.015665	0.023631	0.020764	0.079953	0.0337	0.024778	0.000273
Bragança	Pará	NO	553	0.059675	0.231465	0.057866	0.0434	0.035262	0.154611	0.005425	0.039783	0.034358	0.035262	0.117541	0.030741	0.029837	0.000904	0.003617	0	0.017179	0.084087	0.000904	0.016275	0.001808	0.028568	0.044661	0.006329	0.039799	0.104031	0.03403	0.016693	0.146215	0.003617	0.022604	0.067914	0.098417	0.004521	0.009946	0.094921	0.009042	0	0.000904	0.01085	0.028029	0.037071	0.073195	0.028197	0.017179	0
Cametá	Pará	NO	1411	0.049965	0.260454	0.064139	0.046775	0.042169	0.155563	0.002481	0.04394	0.043586	0.036145	0.10489	0.01949	0.0163	0.007796	0.002126	0	0.010985	0.08292	0.000354	0.007442	0.002481	0.050604	0.030046	0.008859	0.039899	0.109619	0.023742	0.017009	0.12663	0.006024	0.026535	0.068893	0.085643	0.01382	0.011694	0.068624	0.021262	0	0.004252	0.016655	0.030401	0.015526	0.094512	0.040723	0.015817	0
Capanema	Pará	NO	1830	0.063916	0.24827	0.068822	0.040423	0.040974	0.122071	0.00847	0.028955	0.049145	0.048884	0.098333	0.031694	0.027042	0.008743	0.005464	0	0.00929	0.077837	0.001913	0.017213	0.002186	0.051487	0.033495	0.011114	0.040648	0.093669	0.038459	0.017213	0.150195	0.008364	0.019888	0.057193	0.072219	0.014754	0.012022	0.087441	0.019888	0.000273	0.000546	0.013859	0.025817	0.024768	0.078825	0.02892	0.025817	0.001093
Castanhal	Pará	NO	9447	0.064359	0.253784	0.074574	0.04647	0.051498	0.114957	0.007198	0.030909	0.043135	0.049592	0.090134	0.028686	0.030909	0.00778	0.004022	0.000106	0.010109	0.071928	0.001482	0.01556	0.002805	0.058971	0.035749	0.010785	0.051781	0.10614	0.035511	0.013891	0.124128	0.008397	0.019592	0.056574	0.066533	0.013328	0.01564	0.092963	0.013264	0.000106	0.002085	0.016443	0.023169	0.023356	0.081349	0.030013	0.023951	0.000805
Curuçá	Pará	NO	149	0.033557	0.281879	0.080537	0.030201	0.030201	0.151007	0.003356	0.050336	0.026846	0.033557	0.104027	0.02349	0.033557	0.006711	0.003356	0	0.010067	0.077181	0.006711	0.013423	0	0.083893	0.020134	0.016779	0.036913	0.127517	0.026846	0.016779	0.167785	0	0.013423	0.104027	0.04698	0.003356	0.013423	0.07047	0.010067	0	0	0.020134	0.006711	0.026846	0.07047	0.050336	0.026846	0
Marabá	Pará	NO	2247	0.068115	0.264762	0.081735	0.039135	0.059932	0.085274	0.007121	0.022642	0.051873	0.064475	0.069077	0.027099	0.034738	0.010812	0.004673	0	0.013271	0.06526	0.00178	0.018469	0.006008	0.056285	0.039152	0.012007	0.050287	0.105221	0.040712	0.021134	0.114785	0.009791	0.015785	0.041817	0.052938	0.015354	0.024695	0.104113	0.018914	0	0.00267	0.010903	0.027361	0.026916	0.0663	0.023582	0.033145	0
Marituba	Pará	NO	1715	0.062974	0.24723	0.069971	0.043732	0.046064	0.126531	0.005539	0.027697	0.032945	0.053353	0.105539	0.031195	0.025656	0.007872	0.005248	0	0.009329	0.079592	0.002915	0.014577	0.002041	0.04882	0.036374	0.011282	0.05121	0.09448	0.029782	0.015967	0.153248	0.00379	0.016618	0.063119	0.069137	0.014869	0.013703	0.087524	0.016327	0	0.000875	0.015743	0.027901	0.021866	0.075368	0.032285	0.02152	0
Oriximiná	Pará	NO	704	0.071733	0.254261	0.080966	0.024858	0.041193	0.151989	0.007812	0.033381	0.034801	0.041903	0.089489	0.019176	0.027699	0.010653	0.002841	0	0.007102	0.090199	0.002131	0.007812	0	0.066051	0.036932	0.007102	0.049006	0.081676	0.03267	0.024858	0.158381	0.008523	0.017045	0.066051	0.067472	0.009233	0.007812	0.099432	0.011364	0	0.002841	0.012784	0.020597	0.026278	0.070312	0.043324	0.025568	0
Paragominas	Pará	NO	939	0.068413	0.245911	0.082849	0.047221	0.045783	0.095886	0.01028	0.031949	0.040808	0.06279	0.072158	0.035578	0.030423	0.012247	0.006922	0.000532	0.01065	0.068814	0.000532	0.016507	0.00213	0.064918	0.044632	0.014377	0.05794	0.096758	0.041964	0.019634	0.125949	0.009052	0.018104	0.049462	0.069138	0.01278	0.019702	0.08511	0.015442	0	0.001065	0.014377	0.024382	0.023371	0.06965	0.022897	0.020767	0
Parauapebas	Pará	NO	178	0.055931	0.252158	0.075466	0.042135	0.055931	0.109285	0.005618	0.038982	0.042135	0.064607	0.070023	0.025281	0.033708	0.008427	0.002809	0	0.011236	0.075466	0	0.019663	0.008427	0.064607	0.042135	0.014045	0.058989	0.103933	0.047753	0.008427	0.109551	0.022472	0.030899	0.042135	0.050562	0.011236	0.016854	0.075843	0.022472	0	0.002809	0.011236	0.016854	0.022472	0.061798	0.02809	0.030899	0
Redenção	Pará	NO	736	0.088315	0.243886	0.078125	0.055027	0.069293	0.092391	0.01019	0.03125	0.061141	0.067255	0.036005	0.019701	0.031929	0.011549	0.009511	0	0.014266	0.058424	0.000679	0.019701	0.001359	0.060462	0.05231	0.011549	0.05163	0.10394	0.04212	0.025136	0.105299	0.016984	0.015625	0.03125	0.058424	0.01019	0.023098	0.108016	0.018342	0	0.001359	0.008152	0.033288	0.030571	0.059103	0.016984	0.037364	0
Tucuruí	Pará	NO	839	0.059982	0.250876	0.07492	0.047547	0.054002	0.108132	0.010727	0.035591	0.039103	0.050595	0.086226	0.023123	0.036189	0.007747	0.00298	0	0.008343	0.075559	0.002384	0.018332	0.004768	0.061212	0.038141	0.017878	0.061314	0.119533	0.033969	0.015978	0.109478	0.009535	0.020262	0.052961	0.060718	0.007747	0.016091	0.095814	0.014303	0	0.003576	0.010727	0.02727	0.015495	0.077933	0.02205	0.028537	0.000596
Ariquemes	Rondônia	NO	9651	0.086186	0.247779	0.086966	0.054393	0.054316	0.093427	0.012676	0.027806	0.04479	0.059544	0.051298	0.031404	0.033328	0.009564	0.005595	0	0.008578	0.069133	0.001761	0.015935	0.002374	0.06639	0.048716	0.014486	0.054401	0.10092	0.045164	0.018765	0.115014	0.010504	0.017104	0.035942	0.047626	0.010193	0.01926	0.109235	0.019863	0.000518	0.001917	0.0086	0.026452	0.021872	0.081628	0.021582	0.026431	0.000104
Guajará-Mirim	Rondônia	NO	2656	0.065172	0.278077	0.064997	0.043575	0.039969	0.109627	0.007832	0.024096	0.040493	0.059571	0.087244	0.02513	0.026136	0.004706	0.003012	0	0.013178	0.085829	0.000377	0.016144	0.002259	0.049999	0.035678	0.012801	0.044756	0.102854	0.029484	0.016566	0.134934	0.00799	0.01506	0.081558	0.075145	0.006777	0.018261	0.090985	0.019202	0	0.001694	0.016914	0.023488	0.01861	0.073101	0.033634	0.023299	0
Ji-Paraná	Rondônia	NO	12302	0.090587	0.24859	0.08519	0.054938	0.052443	0.093363	0.012889	0.031676	0.044714	0.05427	0.047057	0.031113	0.032319	0.009162	0.005964	8.1e-05	0.010283	0.070133	0.002032	0.015616	0.002439	0.070479	0.049238	0.014034	0.054976	0.096487	0.047799	0.019628	0.113387	0.012243	0.017976	0.03319	0.047171	0.013189	0.015622	0.113414	0.020246	8.1e-05	0.001423	0.007775	0.027439	0.022998	0.076746	0.0179	0.029339	8.1e-05
Porto Velho	Rondônia	NO	14364	0.076734	0.260635	0.0791	0.046062	0.054178	0.105337	0.009377	0.029318	0.040868	0.052068	0.072711	0.028904	0.030094	0.009039	0.004334	3.5e-05	0.00998	0.071575	0.001636	0.013524	0.002402	0.061465	0.041852	0.012148	0.051938	0.100841	0.039449	0.017766	0.121654	0.008698	0.0186	0.051996	0.061048	0.011825	0.017143	0.098975	0.01788	0.000313	0.002054	0.013354	0.024702	0.024808	0.078125	0.022821	0.025324	0.000348
Vilhena	Rondônia	NO	4691	0.096248	0.26796	0.095822	0.04967	0.045513	0.091878	0.013004	0.030164	0.044873	0.058197	0.045939	0.029098	0.033149	0.006502	0.005756	0	0.008314	0.060968	0.001386	0.012471	0.003091	0.072266	0.051162	0.016734	0.054892	0.095076	0.055425	0.022383	0.123641	0.010126	0.018333	0.034214	0.042102	0.009486	0.014602	0.110637	0.016841	0.000107	0.001066	0.006608	0.024089	0.022596	0.076743	0.01844	0.023982	0.000213
Boa Vista	Roraima	NO	7982	0.070408	0.270374	0.069092	0.046	0.050884	0.111139	0.009709	0.027359	0.039558	0.052063	0.082114	0.026729	0.027422	0.007454	0.005058	0.000125	0.009835	0.074225	0.001128	0.016519	0.001942	0.054596	0.036698	0.0112	0.047261	0.114384	0.037805	0.016698	0.130999	0.008958	0.016591	0.054081	0.065737	0.008865	0.015077	0.089149	0.016877	0.000376	0.002255	0.014021	0.021276	0.024229	0.081482	0.030286	0.02552	0.000125
Araguaína	Tocantins	NO	8911	0.074012	0.254931	0.081198	0.043445	0.057015	0.093102	0.010432	0.026694	0.046659	0.065226	0.056406	0.02899	0.035471	0.011147	0.007269	0.000168	0.011765	0.06785	0.001347	0.021257	0.002693	0.061219	0.040455	0.011907	0.051558	0.115052	0.037132	0.019833	0.113849	0.011176	0.013664	0.035345	0.050048	0.012344	0.021294	0.10587	0.020131	5.6e-05	0.001756	0.00898	0.026966	0.027659	0.072707	0.018408	0.036952	0
Gurupi	Tocantins	NO	1860	0.082258	0.266935	0.088978	0.050806	0.05457	0.090591	0.012903	0.026613	0.051344	0.061022	0.050806	0.025269	0.031183	0.005108	0.006989	0	0.014247	0.057258	0.000806	0.019892	0.002419	0.069569	0.05209	0.013938	0.045685	0.094232	0.045899	0.024462	0.114117	0.007796	0.014477	0.034946	0.046196	0.012366	0.022823	0.112754	0.02331	0.000269	0.002151	0.006648	0.030336	0.027375	0.067138	0.017742	0.029777	0
Porto Nacional	Tocantins	NO	2063	0.077742	0.248492	0.085985	0.049175	0.058873	0.085503	0.008936	0.020101	0.046245	0.063178	0.046258	0.025933	0.036338	0.016481	0.007271	0.000485	0.012603	0.077504	0.001454	0.026175	0.004605	0.057131	0.04587	0.014057	0.042919	0.109864	0.036165	0.02148	0.114004	0.007513	0.014672	0.040251	0.046273	0.011149	0.026833	0.103146	0.022782	0	0.001939	0.008725	0.030007	0.027566	0.071262	0.020902	0.033421	0
Palmas	Tocantins	NO	17372	0.078863	0.256178	0.084459	0.049736	0.055985	0.096925	0.009764	0.02961	0.047714	0.062536	0.049967	0.027725	0.032928	0.009562	0.006341	2.9e-05	0.012134	0.066013	0.00118	0.018168	0.002504	0.063939	0.04476	0.013545	0.050087	0.103336	0.042509	0.02137	0.112243	0.009968	0.017712	0.03515	0.047558	0.01367	0.019255	0.104531	0.019404	0.000201	0.001669	0.008548	0.030301	0.027125	0.076082	0.020641	0.031171	0.000376
Aracruz	Espírito Santo	SE	2690	0.089489	0.252824	0.075909	0.041033	0.055144	0.10799	0.016118	0.027493	0.049013	0.058841	0.050688	0.027816	0.023735	0.00948	0.006134	0	0.011524	0.073688	0.001115	0.016914	0.003717	0.061084	0.047125	0.016914	0.039641	0.106111	0.058641	0.015985	0.118326	0.012268	0.01703	0.045107	0.03915	0.014126	0.019485	0.101268	0.019358	0	0.001487	0.008736	0.025203	0.018587	0.076936	0.018554	0.027066	0.000186
Cachoeiro de Itapemirim	Espírito Santo	SE	3964	0.086021	0.256922	0.092142	0.053678	0.050717	0.099218	0.016392	0.034341	0.047003	0.055515	0.035198	0.033772	0.032159	0.009138	0.007289	0.000126	0.008829	0.060105	0.001261	0.013127	0.001387	0.071521	0.055161	0.011352	0.0485	0.084611	0.051986	0.017615	0.124141	0.011352	0.026347	0.029685	0.035234	0.012585	0.017637	0.112313	0.019278	0.000252	0.002901	0.004611	0.029109	0.024058	0.084437	0.011604	0.024624	0.000252
Cariacica	Espírito Santo	SE	11201	0.088475	0.244547	0.094635	0.048987	0.059296	0.08834	0.01446	0.029625	0.044745	0.062598	0.042965	0.028067	0.030656	0.01065	0.006383	0.000134	0.011599	0.073267	0.000937	0.016732	0.00241	0.072049	0.048324	0.015336	0.045935	0.101195	0.047307	0.02025	0.116209	0.011907	0.016409	0.032072	0.040913	0.012878	0.018438	0.108507	0.019922	4.5e-05	0.002187	0.005624	0.028627	0.020815	0.074904	0.018886	0.035024	0
Colatina	Espírito Santo	SE	13027	0.095567	0.253878	0.095891	0.046918	0.051852	0.096848	0.01355	0.032686	0.039027	0.062633	0.039869	0.031682	0.03125	0.008866	0.005702	0.000269	0.01039	0.062914	0.001727	0.014032	0.002303	0.06833	0.056479	0.020599	0.045733	0.095042	0.053637	0.019838	0.120125	0.011474	0.019835	0.032268	0.037869	0.011399	0.019185	0.102061	0.01788	7.7e-05	0.003378	0.004145	0.02632	0.01976	0.081916	0.016846	0.027771	0
Guarapari	Espírito Santo	SE	1519	0.07683	0.230529	0.099938	0.047846	0.062272	0.089878	0.015142	0.026923	0.049992	0.065971	0.041097	0.03533	0.034394	0.010533	0.004279	0	0.011395	0.068187	0.001317	0.022304	0.002304	0.068803	0.044635	0.011192	0.054087	0.104826	0.048947	0.018104	0.10596	0.009546	0.019631	0.028597	0.043315	0.009546	0.023264	0.108755	0.020079	0.000329	0.001646	0.005925	0.028966	0.021283	0.080956	0.014812	0.030016	0.000329
Linhares	Espírito Santo	SE	12032	0.080729	0.249296	0.087717	0.041744	0.056933	0.09646	0.013215	0.02696	0.040859	0.069024	0.050252	0.028206	0.030482	0.010675	0.008015	0.000125	0.010575	0.076375	0.001787	0.016949	0.002992	0.062514	0.047799	0.015931	0.04285	0.105417	0.051393	0.015542	0.118563	0.009324	0.015348	0.042101	0.044709	0.010519	0.021289	0.09773	0.019152	0.000125	0.002452	0.0064	0.025501	0.01997	0.074626	0.020622	0.036586	8.3e-05
Marataízes	Espírito Santo	SE	225	0.063912	0.270872	0.084963	0.043744	0.071111	0.056015	0.004444	0.024444	0.070618	0.066148	0.048889	0.031111	0.05496	0.002222	0.002222	0	0.024444	0.053333	0	0.014254	0.002222	0.073333	0.04	0.004444	0.066667	0.093333	0.046667	0.017778	0.117778	0.013333	0.017778	0.031111	0.033333	0.006667	0.022222	0.166667	0.011111	0	0	0.004444	0.02	0.022222	0.075556	0.017778	0.024444	0
São Mateus	Espírito Santo	SE	4461	0.079543	0.244594	0.088128	0.049985	0.068472	0.085593	0.013182	0.023897	0.039492	0.075742	0.04081	0.028841	0.03221	0.011946	0.008462	0	0.011769	0.072809	0.001345	0.01554	0.003394	0.068787	0.052208	0.014224	0.046608	0.103859	0.045159	0.016023	0.108127	0.009751	0.016364	0.036518	0.038216	0.01132	0.026998	0.099497	0.024095	0.000224	0.001569	0.006501	0.026222	0.022189	0.072826	0.022631	0.037533	0
Serra	Espírito Santo	SE	14383	0.080641	0.245276	0.09058	0.045553	0.061904	0.089277	0.014024	0.026939	0.044403	0.065828	0.042636	0.028746	0.032818	0.011684	0.0092	3.5e-05	0.013057	0.07195	0.001495	0.018163	0.003247	0.067903	0.04715	0.015093	0.049171	0.102917	0.050143	0.018092	0.111469	0.009961	0.017445	0.033988	0.040571	0.012703	0.022397	0.107563	0.019934	0.000104	0.00219	0.005585	0.028724	0.022338	0.073817	0.018887	0.03471	0
Viana	Espírito Santo	SE	1517	0.086355	0.241595	0.101187	0.044166	0.05768	0.093606	0.015162	0.02472	0.041859	0.058998	0.042518	0.029334	0.027357	0.012525	0.005603	0	0.011866	0.083718	0.001648	0.018787	0.001318	0.076137	0.053724	0.015162	0.050758	0.095913	0.050758	0.013843	0.120633	0.00824	0.016809	0.03296	0.053395	0.020105	0.021094	0.100527	0.018457	0	0.001978	0.004285	0.023731	0.018787	0.073171	0.019446	0.033289	0
Vila Velha	Espírito Santo	SE	16070	0.092157	0.256262	0.092267	0.049631	0.052707	0.093068	0.015098	0.031068	0.047125	0.057107	0.040725	0.031395	0.031364	0.009853	0.006223	3.1e-05	0.010516	0.063703	0.001182	0.013152	0.002271	0.071215	0.052291	0.016962	0.050894	0.087556	0.053106	0.018514	0.114103	0.011005	0.019941	0.031071	0.040112	0.011699	0.016769	0.112669	0.017616	0.000218	0.002178	0.004978	0.028415	0.020729	0.084487	0.018277	0.029281	6.2e-05
Vitória	Espírito Santo	SE	18606	0.093242	0.254711	0.095368	0.051157	0.05135	0.096425	0.015381	0.030308	0.046574	0.056232	0.039395	0.03293	0.031129	0.008725	0.005121	2.7e-05	0.010115	0.063718	0.001478	0.012152	0.002365	0.067398	0.049876	0.015936	0.048452	0.088197	0.052617	0.020853	0.121574	0.01126	0.019456	0.032006	0.04031	0.013517	0.016366	0.11636	0.016796	0.000215	0.002123	0.004622	0.027975	0.02166	0.083951	0.01736	0.026819	0.000107
Araguari	Minas Gerais	SE	3284	0.100068	0.260035	0.085688	0.051819	0.051708	0.087556	0.015172	0.031879	0.046711	0.055142	0.039374	0.03619	0.035789	0.008374	0.006155	0	0.010744	0.057474	0.002893	0.011419	0.001675	0.062669	0.056297	0.014921	0.056435	0.089984	0.050813	0.026713	0.102478	0.008831	0.014681	0.03106	0.038754	0.018843	0.014267	0.12226	0.01827	0.000305	0.001979	0.004415	0.02908	0.029409	0.081411	0.019381	0.023538	0.000457
Belo Horizonte	Minas Gerais	SE	41567	0.090424	0.253383	0.091842	0.055358	0.059833	0.085351	0.012368	0.031522	0.047781	0.059069	0.031443	0.032117	0.03538	0.010266	0.007664	4.8e-05	0.012208	0.064015	0.001949	0.013231	0.002506	0.073452	0.051754	0.014156	0.060619	0.08405	0.045485	0.021943	0.112754	0.012044	0.017421	0.02422	0.038853	0.013944	0.018775	0.118796	0.021693	0.000241	0.002037	0.003164	0.033749	0.027866	0.079389	0.015635	0.030419	0.00018
Betim	Minas Gerais	SE	9014	0.081635	0.249661	0.087953	0.048764	0.068497	0.078433	0.009541	0.027209	0.046457	0.068721	0.031595	0.029535	0.039906	0.013633	0.008801	0	0.012911	0.072438	0.002829	0.018124	0.002496	0.073828	0.050975	0.012979	0.060072	0.097791	0.040325	0.020302	0.112434	0.010206	0.017306	0.024905	0.033614	0.011704	0.024961	0.113322	0.02546	0.000277	0.002052	0.004937	0.031839	0.02657	0.071498	0.016807	0.037663	0
Caratinga	Minas Gerais	SE	231	0.108092	0.216306	0.114696	0.060979	0.05211	0.077922	0.010823	0.045455	0.04329	0.074731	0.032468	0.021645	0.045455	0.006494	0.002165	0	0.010823	0.049784	0.002165	0.012987	0	0.049784	0.065213	0.019481	0.066636	0.091277	0.054113	0.008658	0.137518	0.008658	0.029478	0.02381	0.028139	0.010823	0.015152	0.1076	0.006494	0	0.002165	0.002165	0.025974	0.017316	0.089447	0.019481	0.020631	0
Contagem	Minas Gerais	SE	8919	0.083621	0.251718	0.085994	0.054061	0.065115	0.081556	0.010586	0.030425	0.047428	0.066121	0.031631	0.03179	0.036602	0.013098	0.007766	0.000168	0.014578	0.065381	0.001962	0.014446	0.002579	0.074373	0.051377	0.013885	0.062637	0.086409	0.042564	0.020028	0.107577	0.010608	0.016241	0.027112	0.037794	0.014053	0.024041	0.11593	0.023365	0.000112	0.001233	0.003812	0.03271	0.029701	0.078001	0.014674	0.029635	5.6e-05
Coronel Fabriciano	Minas Gerais	SE	1336	0.089446	0.220808	0.090569	0.053144	0.064371	0.081961	0.010853	0.033308	0.055389	0.066243	0.041916	0.025823	0.037799	0.016467	0.008982	0	0.01497	0.072605	0.002994	0.010853	0.001497	0.075286	0.048092	0.011839	0.06333	0.091404	0.038548	0.020866	0.108971	0.013346	0.023952	0.021526	0.037945	0.014222	0.019461	0.108243	0.018988	0	0.001123	0.004491	0.02912	0.028443	0.086093	0.015228	0.035928	0.000374
Divinópolis	Minas Gerais	SE	5866	0.089395	0.276881	0.087353	0.049242	0.067938	0.089384	0.011143	0.029259	0.048592	0.048486	0.032494	0.031052	0.032561	0.009923	0.00537	0	0.013192	0.059637	0.001534	0.013342	0.001193	0.065473	0.054145	0.021955	0.061722	0.078161	0.041897	0.028839	0.111369	0.010638	0.013939	0.023816	0.03737	0.014989	0.01727	0.117795	0.023338	0	0.002642	0.002898	0.043257	0.038276	0.084607	0.015172	0.026571	0
Frutal	Minas Gerais	SE	2952	0.090095	0.271	0.083581	0.051369	0.055221	0.079579	0.009316	0.035223	0.051101	0.057515	0.036204	0.035905	0.028625	0.00813	0.004065	0	0.006775	0.069185	0.001186	0.017337	0.002541	0.074526	0.061145	0.01372	0.057588	0.08689	0.048103	0.04065	0.110095	0.015244	0.013889	0.035738	0.036416	0.014228	0.013211	0.112636	0.015921	0.000508	0.002541	0.006606	0.0271	0.029641	0.078421	0.016091	0.021511	0.000339
Governador Valadares	Minas Gerais	SE	3284	0.081753	0.246175	0.088629	0.048761	0.066874	0.078717	0.013822	0.02752	0.04305	0.068841	0.03267	0.03128	0.038714	0.012871	0.008983	0	0.014247	0.073561	0.002436	0.016262	0.002893	0.073275	0.051262	0.01871	0.057478	0.097292	0.045349	0.017966	0.100508	0.010782	0.017661	0.029468	0.035132	0.012333	0.022686	0.120164	0.02098	0.000152	0.001523	0.003959	0.032094	0.023876	0.069346	0.016099	0.035132	0
Ibirité	Minas Gerais	SE	1630	0.08773	0.240184	0.084969	0.046933	0.064724	0.078834	0.008282	0.028221	0.041718	0.07638	0.030368	0.031288	0.032515	0.016564	0.010736	0	0.019018	0.076074	0.00184	0.020245	0.003374	0.070378	0.056012	0.009816	0.053733	0.098716	0.03848	0.013091	0.110668	0.011963	0.01319	0.022259	0.040757	0.01227	0.034262	0.111008	0.023491	0	0.00184	0.004908	0.033907	0.025647	0.079795	0.016871	0.036587	0
Ipatinga	Minas Gerais	SE	2347	0.090961	0.248182	0.087343	0.054254	0.06118	0.078963	0.012782	0.035525	0.047874	0.054414	0.035687	0.035312	0.035687	0.012663	0.009161	0.000213	0.012995	0.069921	0.00213	0.011012	0.001278	0.07712	0.048786	0.012995	0.063911	0.091606	0.038134	0.02173	0.108436	0.012995	0.028547	0.026204	0.034725	0.01193	0.020026	0.121432	0.020026	0	0.002556	0.003196	0.030038	0.02663	0.081594	0.012995	0.033873	0.000213
Itajubá	Minas Gerais	SE	490	0.090816	0.261224	0.09898	0.053061	0.035714	0.082653	0.002041	0.038776	0.073469	0.034694	0.054082	0.030612	0.042857	0.006122	0.00102	0.00102	0.011224	0.069388	0.00102	0.008163	0.003061	0.072449	0.063265	0.017347	0.07449	0.076531	0.037755	0.022449	0.117347	0.008163	0.030612	0.035714	0.045918	0.017347	0.010204	0.107143	0.017347	0	0.003061	0.003061	0.021429	0.020408	0.086735	0.018367	0.020408	0
Ituiutaba	Minas Gerais	SE	6978	0.090065	0.260451	0.077598	0.05166	0.072868	0.085193	0.0091	0.033032	0.051804	0.060401	0.039766	0.024362	0.033389	0.009817	0.007595	0.000215	0.011894	0.063626	0.00086	0.014044	0.002221	0.065334	0.051189	0.013439	0.051828	0.089136	0.035792	0.029434	0.101203	0.01168	0.017905	0.029381	0.042019	0.01597	0.019331	0.112808	0.022121	0.000573	0.001678	0.006664	0.031842	0.033497	0.086447	0.020249	0.030546	0
Juiz de Fora	Minas Gerais	SE	13714	0.088689	0.248902	0.09306	0.056529	0.057015	0.094185	0.012195	0.031311	0.047907	0.056587	0.03053	0.03479	0.034851	0.008483	0.00531	0	0.012787	0.068347	0.002078	0.012623	0.001641	0.069856	0.05106	0.01581	0.062054	0.084665	0.048025	0.0228	0.111358	0.013406	0.020224	0.024466	0.036966	0.016197	0.015577	0.119557	0.021749	0	0.001531	0.003193	0.031751	0.027608	0.083012	0.014162	0.029555	0.000109
Montes Claros	Minas Gerais	SE	5655	0.080487	0.257225	0.082782	0.059834	0.054866	0.08281	0.011646	0.027054	0.037687	0.072057	0.037855	0.0307	0.031143	0.010522	0.009726	8.8e-05	0.01561	0.070655	0.000973	0.02098	0.003006	0.067525	0.052851	0.012067	0.060587	0.107179	0.041176	0.022715	0.114884	0.010585	0.015985	0.025793	0.050397	0.010345	0.020718	0.1014	0.020391	0	0.002387	0.004332	0.024757	0.030981	0.079805	0.016923	0.027451	0.000177
Muriaé	Minas Gerais	SE	136	0.099265	0.220588	0.080882	0.058824	0.0625	0.091912	0.007353	0.033088	0.040441	0.095588	0.036765	0.007353	0.058824	0.011029	0.003676	0	0.014706	0.069853	0	0.007353	0	0.055147	0.066176	0.025735	0.036765	0.099265	0.047794	0.047794	0.110294	0.007353	0.003676	0.025735	0.018382	0.014706	0.029412	0.102941	0.018382	0	0.003676	0.007353	0.047794	0.040441	0.0625	0.003676	0.040441	0
Patos de Minas	Minas Gerais	SE	7775	0.086688	0.279486	0.081929	0.054662	0.062251	0.099871	0.011318	0.037299	0.048939	0.044759	0.032605	0.031704	0.03627	0.007974	0.006559	6.4e-05	0.011318	0.054534	0.001543	0.009582	0.000643	0.060986	0.055619	0.013463	0.07813	0.080317	0.04686	0.036597	0.112906	0.010303	0.019583	0.021348	0.032951	0.013298	0.012268	0.118905	0.019261	6.4e-05	0.000965	0.00486	0.036058	0.038425	0.085697	0.014159	0.019509	0
Pouso Alegre	Minas Gerais	SE	3794	0.096712	0.279672	0.094538	0.054862	0.045502	0.092081	0.007907	0.03384	0.059097	0.043327	0.042908	0.036546	0.027652	0.005226	0.003954	0	0.008171	0.055709	0.001581	0.008303	0.001054	0.069168	0.049331	0.018007	0.060862	0.084932	0.036954	0.021329	0.113948	0.010807	0.020912	0.034842	0.052772	0.016421	0.008039	0.127035	0.015629	0.000132	0.002768	0.006985	0.031437	0.024948	0.081666	0.016342	0.019504	0.000264
Ribeirão das Neves	Minas Gerais	SE	1670	0.079373	0.24512	0.083679	0.050927	0.065971	0.06923	0.01211	0.031147	0.046115	0.070527	0.033048	0.024022	0.042425	0.015723	0.011809	0	0.014218	0.069089	0.001796	0.021735	0.004491	0.064371	0.051796	0.011976	0.058982	0.097006	0.043413	0.018563	0.111078	0.013772	0.013473	0.02994	0.030838	0.008683	0.026647	0.10988	0.028743	0	0.002096	0.005389	0.027545	0.028743	0.066168	0.02006	0.045808	0
Sabará	Minas Gerais	SE	1177	0.086608	0.237355	0.088737	0.044596	0.074295	0.067941	0.008921	0.024624	0.038203	0.071314	0.029312	0.028874	0.046279	0.014444	0.014868	0	0.014019	0.080265	0.00085	0.024214	0.003823	0.078974	0.054318	0.013551	0.068792	0.113776	0.036925	0.017809	0.106939	0.008431	0.012744	0.025465	0.03441	0.01062	0.022515	0.110358	0.026338	0	0.000425	0.002124	0.026717	0.02759	0.069198	0.013169	0.038233	0.00085
Santa Luzia	Minas Gerais	SE	1380	0.080109	0.236994	0.079781	0.043779	0.077525	0.081855	0.00942	0.029007	0.049472	0.06964	0.029263	0.031805	0.03485	0.017268	0.010507	0	0.01558	0.072833	0.002174	0.019337	0.004348	0.069203	0.050362	0.016667	0.054348	0.092029	0.035507	0.019203	0.114493	0.01087	0.014855	0.030072	0.032246	0.016667	0.023913	0.11558	0.026449	0.000362	0.000725	0.002174	0.034783	0.030072	0.06413	0.018841	0.041304	0
Sete Lagoas	Minas Gerais	SE	4357	0.082281	0.260845	0.080675	0.054051	0.070576	0.077462	0.008148	0.027198	0.046133	0.069658	0.036952	0.025476	0.039247	0.010558	0.01182	0	0.015837	0.062773	0.001607	0.014919	0.003787	0.068511	0.053137	0.012738	0.059413	0.092287	0.038893	0.020292	0.114819	0.00964	0.014381	0.02804	0.040986	0.012939	0.025214	0.11417	0.026723	0.00023	0.001721	0.001721	0.03218	0.02387	0.071901	0.018044	0.035513	0.00023
Teófilo Otoni	Minas Gerais	SE	516	0.083333	0.222868	0.096899	0.061047	0.083333	0.073643	0.015504	0.023256	0.040698	0.065891	0.039729	0.02907	0.032946	0.010659	0.015504	0	0.010659	0.070736	0.000969	0.01938	0.003876	0.08131	0.053269	0.008721	0.049419	0.10942	0.051303	0.017442	0.13075	0.014446	0.016473	0.021318	0.028101	0.00969	0.021318	0.112316	0.027082	0	0	0.001938	0.023256	0.020349	0.067768	0.01938	0.039694	0
Timóteo	Minas Gerais	SE	5035	0.086104	0.240981	0.087303	0.056333	0.062401	0.077666	0.010924	0.031643	0.053645	0.063669	0.036628	0.030444	0.034028	0.013704	0.007944	0	0.014486	0.07025	0.002383	0.016474	0.001986	0.074275	0.053659	0.01403	0.059739	0.095792	0.039591	0.01695	0.110098	0.01084	0.021271	0.020474	0.034828	0.014002	0.020091	0.111864	0.024432	9.9e-05	0.001589	0.003178	0.035597	0.024381	0.08373	0.015359	0.03152	9.9e-05
Ubá	Minas Gerais	SE	399	0.11142	0.28058	0.088959	0.055116	0.048872	0.07514	0.011278	0.036341	0.056348	0.058877	0.036341	0.037531	0.025016	0.005013	0.003759	0	0.007519	0.053885	0.001253	0.005013	0.001253	0.050125	0.051378	0.010025	0.065163	0.082707	0.04386	0.016291	0.115288	0.018797	0.025063	0.018797	0.038847	0.017544	0.016291	0.139098	0.015038	0	0	0.001253	0.028822	0.046366	0.078947	0.015038	0.026316	0
Uberaba	Minas Gerais	SE	18106	0.092198	0.261453	0.089485	0.052597	0.063344	0.090424	0.010565	0.030108	0.04857	0.056387	0.035094	0.031818	0.031889	0.008637	0.005882	0	0.012135	0.059668	0.001795	0.014439	0.002099	0.06317	0.056059	0.012353	0.0557	0.089937	0.045022	0.026544	0.112124	0.011267	0.015559	0.031062	0.040254	0.015262	0.017913	0.11066	0.022496	0.000414	0.001712	0.005595	0.03224	0.031592	0.084224	0.016494	0.027377	0.000663
Uberlândia	Minas Gerais	SE	31997	0.092823	0.261298	0.08665	0.055295	0.060296	0.093498	0.010832	0.032269	0.045998	0.057869	0.038895	0.029331	0.031142	0.008935	0.006244	0.000109	0.010908	0.059137	0.002224	0.012039	0.002125	0.061652	0.054067	0.014194	0.058316	0.089146	0.04562	0.02769	0.108982	0.01014	0.017969	0.030958	0.041276	0.015819	0.016645	0.113382	0.021129	0.000328	0.001661	0.005198	0.032361	0.031309	0.081355	0.017515	0.025602	0.000439
Unaí	Minas Gerais	SE	398	0.09799	0.276382	0.072864	0.042714	0.081658	0.061558	0.002513	0.042714	0.041457	0.069095	0.031407	0.023869	0.03392	0.007538	0.006281	0	0.022613	0.067839	0	0.015075	0.002513	0.044209	0.04725	0.015075	0.059458	0.076472	0.034592	0.024433	0.09904	0.018844	0.031407	0.035859	0.019336	0.013819	0.019336	0.130735	0.026382	0.002513	0.001256	0.007538	0.037688	0.039659	0.076472	0.017588	0.020101	0.001256
Angra dos Reis	Rio de Janeiro	SE	3955	0.082927	0.25358	0.089626	0.044116	0.063963	0.093671	0.01024	0.033753	0.049806	0.062194	0.041844	0.029454	0.032485	0.009987	0.00531	0	0.010872	0.069524	0.001896	0.012516	0.002149	0.061477	0.04358	0.014286	0.055202	0.098329	0.042414	0.017419	0.097253	0.013874	0.022795	0.033233	0.044403	0.016561	0.016308	0.112623	0.023999	0.000253	0.002528	0.007459	0.033233	0.028517	0.082332	0.013654	0.02772	0.000259
Araruama	Rio de Janeiro	SE	1088	0.072196	0.247984	0.082399	0.047185	0.066874	0.097189	0.01011	0.02114	0.055872	0.068391	0.041571	0.029192	0.032426	0.01057	0.004596	0	0.017766	0.06728	0.001379	0.019003	0.002298	0.080942	0.043113	0.012666	0.050862	0.10061	0.050325	0.016196	0.106836	0.009191	0.018382	0.036008	0.030218	0.011738	0.023897	0.115799	0.024552	0	0.002298	0.001379	0.028952	0.025276	0.078685	0.02114	0.033695	0
Barra do Piraí	Rio de Janeiro	SE	1173	0.076014	0.224142	0.094327	0.048888	0.073354	0.082883	0.006394	0.030381	0.048662	0.075664	0.033957	0.029838	0.043357	0.01082	0.008099	0.000426	0.01297	0.064495	0.002984	0.021121	0.002558	0.067383	0.045803	0.015345	0.059551	0.093315	0.039113	0.025454	0.109858	0.011083	0.02046	0.02417	0.033274	0.016624	0.025026	0.110962	0.016997	0	0.002131	0.00341	0.036138	0.025575	0.074663	0.016198	0.035711	0.000426
Barra Mansa	Rio de Janeiro	SE	3208	0.097338	0.246498	0.088062	0.052887	0.05858	0.093878	0.008728	0.028367	0.046699	0.061237	0.035736	0.03476	0.032358	0.008359	0.004989	0	0.011845	0.070454	0.001714	0.012894	0.002182	0.062782	0.057009	0.014027	0.06681	0.086461	0.04316	0.021812	0.109208	0.008865	0.021336	0.024307	0.041111	0.014651	0.019473	0.119007	0.021795	0	0.001247	0.004676	0.030848	0.029595	0.084583	0.014951	0.024923	0.000156
Belford Roxo	Rio de Janeiro	SE	2979	0.079065	0.221224	0.091833	0.047826	0.07299	0.078355	0.010238	0.026494	0.041575	0.074317	0.042079	0.029809	0.036216	0.014562	0.009567	0.000336	0.015274	0.076755	0.001343	0.02493	0.002919	0.07456	0.04686	0.012338	0.052487	0.106599	0.039639	0.014883	0.10616	0.007385	0.015032	0.027104	0.037314	0.014602	0.024732	0.09551	0.027644	0.000168	0.001678	0.0047	0.030575	0.026363	0.068033	0.018127	0.042339	0
Cabo Frio	Rio de Janeiro	SE	1001	0.078422	0.245255	0.089411	0.058442	0.071429	0.102897	0.009491	0.026973	0.044456	0.058941	0.036963	0.027473	0.034466	0.010989	0.005994	0	0.010989	0.063437	0.001998	0.018981	0.002997	0.071091	0.043956	0.013986	0.057604	0.095473	0.048873	0.016983	0.098942	0.010016	0.019824	0.029738	0.03959	0.016809	0.017483	0.111515	0.022977	0	0.002498	0.003996	0.036364	0.023839	0.082326	0.013487	0.028472	0.0005
Campos dos Goytacazes	Rio de Janeiro	SE	2603	0.092445	0.258543	0.080356	0.053108	0.075604	0.090184	0.005763	0.029914	0.048329	0.059247	0.030333	0.032447	0.031854	0.009796	0.007299	0	0.014759	0.059054	0.000768	0.017204	0.001537	0.082011	0.050754	0.008452	0.052118	0.097381	0.029859	0.016284	0.107096	0.00922	0.020132	0.027026	0.034674	0.017246	0.017246	0.144655	0.018632	0.000192	0.001153	0.003842	0.032556	0.018016	0.083254	0.018248	0.028923	0
Duque de Caxias	Rio de Janeiro	SE	6811	0.073973	0.234924	0.085117	0.048097	0.069606	0.083561	0.008222	0.026661	0.049045	0.077924	0.039193	0.028937	0.036645	0.012274	0.010941	0.000294	0.014902	0.06782	0.001395	0.022672	0.002732	0.068272	0.045368	0.013508	0.054985	0.103876	0.038908	0.018646	0.103215	0.009543	0.017619	0.028043	0.043019	0.014976	0.025106	0.111144	0.023198	0.000294	0.002202	0.007488	0.027749	0.023051	0.073264	0.016517	0.037146	7.3e-05
Guapimirim	Rio de Janeiro	SE	205	0.067721	0.240807	0.083915	0.052972	0.062809	0.087337	0.017073	0.028235	0.053659	0.063415	0.038165	0.041463	0.029268	0.012195	0.004878	0	0.012195	0.074008	0.004878	0.012195	0.002439	0.065854	0.058537	0.012195	0.065854	0.1	0.043902	0.021951	0.109756	0.014634	0.019512	0.029268	0.031707	0.012195	0.019512	0.073171	0.02439	0	0	0.007317	0.04878	0.02439	0.092683	0.019512	0.026829	0.004878
Itaboraí	Rio de Janeiro	SE	1000	0.079999	0.239499	0.082999	0.037499	0.075999	0.097	0.0065	0.0245	0.0515	0.0715	0.039	0.029	0.037	0.013	0.0085	0.0005	0.012499	0.0675	0.002	0.022	0.002	0.07592	0.052387	0.014	0.05686	0.09535	0.039353	0.0175	0.105766	0.011	0.017	0.02643	0.033	0.016186	0.023423	0.108754	0.029937	0	0.0015	0.003	0.028806	0.026	0.080323	0.0125	0.0365	0.0005
Itaguaí	Rio de Janeiro	SE	990	0.085859	0.261616	0.085859	0.048485	0.062121	0.083333	0.009596	0.030303	0.036869	0.062121	0.031313	0.031313	0.037374	0.008586	0.008081	0	0.012626	0.074242	0.002525	0.023232	0.004545	0.062723	0.044769	0.015461	0.053301	0.100608	0.04823	0.024747	0.106012	0.010606	0.022222	0.02359	0.042424	0.008586	0.017496	0.102923	0.024242	0.000505	0.005227	0.010606	0.025478	0.03095	0.077495	0.013636	0.037671	0.000505
Itaperuna	Rio de Janeiro	SE	1636	0.075082	0.245744	0.097415	0.050085	0.068395	0.07848	0.008557	0.02838	0.055578	0.063204	0.036641	0.028052	0.034464	0.008863	0.006724	0	0.016504	0.074206	0.001834	0.019193	0.001528	0.075913	0.050415	0.012225	0.053794	0.09339	0.042911	0.018032	0.097259	0.010388	0.019866	0.031631	0.036808	0.013005	0.027557	0.124827	0.019344	0.000306	0.001528	0.004279	0.036606	0.020882	0.06594	0.017304	0.031091	0
Macaé	Rio de Janeiro	SE	2894	0.079272	0.243533	0.086708	0.05596	0.062691	0.090835	0.009157	0.02936	0.048016	0.072885	0.040069	0.027812	0.034721	0.011048	0.009848	0	0.010712	0.069948	0.000864	0.013814	0.002419	0.084057	0.042269	0.015722	0.058504	0.090095	0.044317	0.023272	0.10871	0.011544	0.025177	0.028997	0.037933	0.01434	0.020002	0.106976	0.018487	0	0.002764	0.006393	0.029848	0.018984	0.079734	0.01933	0.0307	0
Magé	Rio de Janeiro	SE	1434	0.086123	0.222455	0.09205	0.040446	0.07357	0.086123	0.00802	0.02894	0.048117	0.084379	0.036611	0.026499	0.038354	0.012552	0.007322	0	0.018828	0.06311	0.000697	0.022664	0.003138	0.077595	0.051088	0.017001	0.052934	0.106125	0.040014	0.017782	0.102928	0.015342	0.0177	0.024693	0.03687	0.013498	0.02603	0.101755	0.02533	0	0.002441	0.008368	0.029234	0.022879	0.074053	0.016039	0.028186	0.001395
Maricá	Rio de Janeiro	SE	734	0.090248	0.252342	0.085092	0.052859	0.055195	0.105579	0.009537	0.034741	0.049583	0.057128	0.034167	0.026795	0.038147	0.012262	0.004087	0	0.013624	0.054911	0.001362	0.012262	0.003406	0.071526	0.050409	0.019074	0.061308	0.08515	0.036785	0.021117	0.123297	0.009537	0.018392	0.026567	0.042916	0.012943	0.014305	0.121935	0.015668	0.001362	0.003406	0.006131	0.023842	0.025204	0.064033	0.02248	0.027248	0
Mesquita	Rio de Janeiro	SE	2177	0.071658	0.242765	0.085898	0.046853	0.072347	0.073496	0.007809	0.02136	0.047772	0.083601	0.04226	0.028709	0.035599	0.011254	0.009646	0.00023	0.01378	0.070969	0.003445	0.026872	0.003675	0.068717	0.037792	0.015388	0.05088	0.104039	0.038712	0.019003	0.10284	0.008498	0.015779	0.031994	0.036676	0.01186	0.0284	0.108434	0.022632	0.00023	0.001148	0.005512	0.028205	0.025118	0.079905	0.017455	0.039863	0
Nilópolis	Rio de Janeiro	SE	1016	0.085813	0.234967	0.082992	0.047501	0.071607	0.084506	0.007874	0.027466	0.045029	0.069138	0.035775	0.026877	0.036836	0.010827	0.010335	0	0.014272	0.073661	0.000492	0.026877	0.003937	0.079263	0.050497	0.015035	0.0504	0.086062	0.042705	0.02313	0.102381	0.007382	0.021475	0.030512	0.034555	0.013546	0.022464	0.103889	0.027901	0	0.001969	0.00689	0.029035	0.02313	0.06548	0.015531	0.040124	0
Niterói	Rio de Janeiro	SE	9826	0.093402	0.254723	0.095847	0.058607	0.055705	0.096813	0.012872	0.032509	0.047314	0.051027	0.034494	0.034849	0.03302	0.008243	0.005645	5.1e-05	0.010889	0.0584	0.002188	0.011496	0.001679	0.072613	0.052316	0.015058	0.064133	0.079121	0.045716	0.022167	0.116969	0.011088	0.021315	0.027367	0.042918	0.013633	0.011393	0.123521	0.017959	0.000254	0.002951	0.003816	0.030254	0.027212	0.086146	0.012865	0.023997	0.000368
Nova Friburgo	Rio de Janeiro	SE	3016	0.100573	0.259811	0.095401	0.056133	0.04774	0.09383	0.013428	0.03638	0.051066	0.05076	0.03073	0.034457	0.033591	0.008455	0.00431	0	0.012035	0.052759	0.000995	0.011605	0.001824	0.074305	0.059195	0.017185	0.060298	0.07273	0.054386	0.031021	0.104018	0.011034	0.025194	0.02582	0.038412	0.014797	0.009781	0.13027	0.01569	0.000166	0.001989	0.001824	0.033751	0.023783	0.074883	0.014526	0.022998	0.000166
Nova Iguaçu	Rio de Janeiro	SE	4284	0.074697	0.243581	0.084617	0.046335	0.070378	0.086835	0.008403	0.030462	0.045285	0.071545	0.045051	0.026377	0.035714	0.012021	0.008987	0.000233	0.013072	0.06641	0.001984	0.024393	0.003618	0.064076	0.04155	0.011088	0.063609	0.097456	0.041317	0.017624	0.105859	0.008053	0.021709	0.032563	0.044234	0.012372	0.02521	0.106326	0.027661	0.000233	0.003035	0.006303	0.028595	0.023109	0.075864	0.013772	0.036765	0
Petrópolis	Rio de Janeiro	SE	10110	0.092945	0.253998	0.094647	0.052025	0.057519	0.091101	0.016587	0.031389	0.048981	0.056102	0.030826	0.031934	0.030893	0.011114	0.006775	4.9e-05	0.011262	0.058708	0.00178	0.016804	0.002423	0.072146	0.058786	0.014351	0.052864	0.08684	0.046879	0.024269	0.105474	0.010489	0.021749	0.021654	0.042845	0.013687	0.013306	0.119079	0.020179	9.9e-05	0.002226	0.002473	0.034539	0.025207	0.083448	0.011753	0.027589	0.000148
Queimados	Rio de Janeiro	SE	938	0.067697	0.232942	0.083156	0.039979	0.074094	0.089019	0.006397	0.028785	0.053305	0.078358	0.047441	0.026652	0.040512	0.011194	0.007996	0.000533	0.013859	0.06823	0.001066	0.025053	0.003731	0.080222	0.048293	0.016525	0.050003	0.111161	0.03511	0.018124	0.114708	0.010128	0.017058	0.029318	0.039852	0.012793	0.022717	0.10793	0.025493	0	0	0.004264	0.025586	0.022388	0.071128	0.013326	0.036712	0
Resende	Rio de Janeiro	SE	1795	0.099373	0.245816	0.093365	0.052278	0.052278	0.095791	0.008357	0.032779	0.037724	0.054924	0.052527	0.031337	0.031104	0.0102	0.007242	0	0.010306	0.066915	0.002786	0.009245	0.002507	0.072287	0.047741	0.018384	0.057613	0.089788	0.040424	0.01922	0.113437	0.009618	0.01922	0.040243	0.050692	0.010864	0.014485	0.099188	0.017457	0.000557	0.001393	0.006407	0.028969	0.029337	0.083226	0.01466	0.02444	0.000279
Rio Bonito	Rio de Janeiro	SE	277	0.107573	0.198062	0.068152	0.066562	0.078842	0.103788	0.009025	0.019856	0.05725	0.064752	0.054152	0.025271	0.041179	0.005415	0.005415	0	0.016245	0.052069	0	0.019856	0.001805	0.062972	0.048606	0.009025	0.059459	0.091915	0.055842	0.025271	0.102695	0.00722	0.01083	0.032301	0.055842	0.018051	0.018051	0.128003	0.021661	0	0	0.00361	0.028881	0.027076	0.066593	0.00361	0.021661	0
Rio das Ostras	Rio de Janeiro	SE	1890	0.08173	0.253076	0.087241	0.057906	0.065052	0.086282	0.009675	0.030159	0.047249	0.065557	0.033361	0.032346	0.03642	0.009259	0.006614	0.000265	0.013492	0.065344	0.001323	0.010582	0.003439	0.070569	0.049173	0.012963	0.060014	0.090435	0.039418	0.016912	0.117642	0.00873	0.02009	0.028813	0.04362	0.011614	0.015588	0.121621	0.017159	0	0.002116	0.008466	0.033588	0.025649	0.079314	0.018254	0.028549	0.000529
Rio de Janeiro	Rio de Janeiro	SE	88280	0.086793	0.249462	0.090484	0.050455	0.060524	0.093893	0.010872	0.031141	0.048499	0.059943	0.037781	0.031778	0.033716	0.009661	0.007055	0.000147	0.012845	0.062875	0.00209	0.015289	0.002532	0.069691	0.050085	0.014425	0.059266	0.089107	0.043782	0.020557	0.112316	0.010589	0.021355	0.027161	0.041019	0.014392	0.016955	0.115105	0.020164	0.000272	0.002203	0.005017	0.030918	0.025881	0.079746	0.015733	0.029011	0.000272
São Gonçalo	Rio de Janeiro	SE	7435	0.082063	0.239449	0.088691	0.050854	0.064505	0.093142	0.010155	0.02928	0.047174	0.068772	0.03938	0.027733	0.036397	0.011436	0.007774	0.000269	0.013835	0.064251	0.001547	0.018695	0.00195	0.070633	0.047793	0.011695	0.06163	0.093822	0.03952	0.018817	0.10867	0.009684	0.016337	0.030052	0.041314	0.012771	0.024526	0.113924	0.024536	0	0.00195	0.004558	0.027958	0.024593	0.078761	0.013646	0.032456	0
São João de Meriti	Rio de Janeiro	SE	2844	0.084564	0.237166	0.076653	0.04782	0.074895	0.080696	0.010373	0.026195	0.04782	0.077532	0.040963	0.028129	0.03692	0.014592	0.010373	0.000176	0.014768	0.062588	0.001934	0.022328	0.003516	0.066632	0.048347	0.013361	0.050809	0.097925	0.037623	0.019691	0.1032	0.010724	0.018812	0.024437	0.04237	0.014592	0.024086	0.107947	0.02391	0	0.001758	0.004747	0.029712	0.02725	0.077004	0.015823	0.042897	0
São Pedro da Aldeia	Rio de Janeiro	SE	3134	0.081634	0.249759	0.090374	0.051265	0.062891	0.092933	0.009892	0.0296	0.044497	0.064845	0.047058	0.0247	0.035812	0.008615	0.005265	0	0.015712	0.060546	0.002927	0.017032	0.001914	0.07825	0.044019	0.010839	0.054078	0.089203	0.044555	0.017417	0.106844	0.008681	0.01966	0.031067	0.044589	0.014445	0.021684	0.109742	0.02148	0.000319	0.002553	0.005265	0.027933	0.023397	0.078592	0.020521	0.026601	0
Saquarema	Rio de Janeiro	SE	385	0.097021	0.27046	0.076386	0.047872	0.062195	0.086696	0.006494	0.024675	0.041558	0.05974	0.028571	0.04601	0.037662	0.01039	0.005751	0.001299	0.006494	0.070001	0.002597	0.011688	0.002597	0.075201	0.036241	0.016883	0.066234	0.092003	0.024675	0.019481	0.120661	0.012987	0.01039	0.027273	0.050559	0.012987	0.006494	0.108743	0.023011	0	0.001299	0.005195	0.034811	0.022078	0.094706	0.01039	0.027114	0
Seropédica	Rio de Janeiro	SE	392	0.084661	0.248317	0.085146	0.048946	0.052814	0.074963	0.008929	0.024289	0.049348	0.053194	0.038265	0.035714	0.030264	0.019133	0.008929	0	0.021684	0.075659	0.006378	0.015836	0.006378	0.063776	0.039541	0.012755	0.042092	0.09949	0.048469	0.02551	0.105867	0.01148	0.02551	0.034439	0.03699	0.017857	0.012755	0.105867	0.016582	0	0.002551	0.008929	0.024235	0.030612	0.079082	0.024235	0.026786	0.001276
Teresópolis	Rio de Janeiro	SE	5030	0.088268	0.257366	0.095318	0.055463	0.059298	0.095928	0.009421	0.0269	0.052553	0.058131	0.028736	0.033936	0.027118	0.010599	0.006262	9.9e-05	0.009742	0.06221	0.002286	0.013355	0.003777	0.069185	0.054076	0.012624	0.055169	0.076441	0.045626	0.021074	0.118887	0.015308	0.020577	0.02664	0.042744	0.012425	0.015308	0.127932	0.018787	0.000199	0.001193	0.002684	0.03171	0.025944	0.083897	0.00994	0.029523	0
Três Rios	Rio de Janeiro	SE	477	0.075022	0.244286	0.091866	0.047783	0.055556	0.087789	0.012579	0.031146	0.049894	0.079091	0.022688	0.048001	0.02935	0.015723	0.008819	0	0.012579	0.055362	0.001048	0.023061	0.002096	0.084906	0.045073	0.010482	0.050314	0.084906	0.056604	0.026205	0.111111	0.01153	0.019916	0.015723	0.046122	0.018868	0.02935	0.110063	0.016771	0	0.005241	0.004193	0.036688	0.033543	0.067086	0.010482	0.026205	0
Volta Redonda	Rio de Janeiro	SE	5199	0.090702	0.253458	0.090022	0.050748	0.061204	0.085338	0.012548	0.033934	0.054099	0.059375	0.033335	0.032111	0.031501	0.008848	0.006828	0	0.010661	0.065148	0.002116	0.014767	0.002308	0.064292	0.050921	0.01711	0.057271	0.092991	0.049188	0.019507	0.106181	0.009617	0.021151	0.024704	0.041423	0.013945	0.01913	0.112316	0.021617	9.6e-05	0.003078	0.004328	0.030375	0.026328	0.08647	0.01356	0.0315	0.000192
Americana	São Paulo	SE	4559	0.102741	0.260799	0.090716	0.063099	0.039216	0.112057	0.013582	0.036507	0.045017	0.04752	0.03831	0.036046	0.027738	0.005264	0.004236	0	0.009322	0.057403	0.001206	0.006408	0.001535	0.061539	0.053436	0.019363	0.048535	0.081145	0.063691	0.021027	0.127971	0.010967	0.026174	0.029544	0.042998	0.013599	0.008335	0.103999	0.016175	0.000329	0.002632	0.004716	0.030533	0.022989	0.098073	0.017165	0.018957	0.000658
Araçatuba	São Paulo	SE	12128	0.09225	0.248281	0.087519	0.054585	0.049152	0.103316	0.012109	0.035067	0.046495	0.05983	0.042163	0.032535	0.031138	0.008016	0.007603	8.2e-05	0.008493	0.059962	0.002432	0.012293	0.001567	0.065264	0.049663	0.016083	0.049507	0.09509	0.050039	0.02112	0.116556	0.011734	0.021636	0.031435	0.046763	0.012406	0.017665	0.101032	0.019155	0.000907	0.002185	0.005236	0.026804	0.023456	0.083074	0.021306	0.02907	0.001698
Araraquara	São Paulo	SE	12606	0.094869	0.245992	0.097398	0.055862	0.047197	0.102965	0.012602	0.041836	0.047631	0.056204	0.042241	0.034238	0.031467	0.005513	0.004541	4e-05	0.009001	0.054169	0.002102	0.009333	0.0023	0.069098	0.051413	0.020026	0.050834	0.083507	0.057247	0.023096	0.124761	0.010233	0.025394	0.031537	0.03944	0.014382	0.01312	0.106	0.016074	0.00036	0.001825	0.004046	0.030556	0.023289	0.085402	0.018364	0.021826	0.0006
Araras	São Paulo	SE	1835	0.100689	0.273056	0.097998	0.058012	0.044937	0.099068	0.012534	0.0335	0.03916	0.047641	0.040823	0.035107	0.034849	0.006202	0.003542	0	0.007084	0.054477	0.002725	0.006812	0.000817	0.062639	0.049302	0.018256	0.05257	0.081447	0.060463	0.022343	0.120132	0.013624	0.024769	0.037862	0.043048	0.012807	0.008174	0.108681	0.020155	0	0.002725	0.005722	0.031319	0.021791	0.096439	0.016339	0.017439	0
Arujá	São Paulo	SE	641	0.086952	0.249719	0.083282	0.058709	0.041747	0.111581	0.0078	0.037613	0.051946	0.03939	0.037441	0.042902	0.039586	0.01248	0.00468	0	0.014041	0.057923	0.00156	0.0117	0.00234	0.053822	0.048362	0.017161	0.053042	0.102184	0.046022	0.026521	0.114665	0.014041	0.020281	0.034321	0.049142	0.017161	0.01014	0.102964	0.014041	0.00234	0.00312	0.00468	0.030421	0.016381	0.084243	0.021841	0.022621	0.00312
Atibaia	São Paulo	SE	5537	0.093839	0.25235	0.094013	0.05055	0.04426	0.098671	0.00967	0.039444	0.0508	0.046562	0.049643	0.033793	0.034861	0.0054	0.005057	0	0.010214	0.06384	0.001445	0.009901	0.001625	0.068202	0.047123	0.015032	0.049248	0.09295	0.04625	0.022846	0.122784	0.007856	0.023208	0.034716	0.046985	0.012281	0.010172	0.109881	0.020059	0.001355	0.002799	0.005689	0.030591	0.023461	0.08409	0.023336	0.023935	0.003103
Barretos	São Paulo	SE	13648	0.083667	0.259279	0.093259	0.052547	0.055073	0.09183	0.009901	0.033675	0.043162	0.064158	0.036403	0.03274	0.032039	0.008925	0.007144	0.00011	0.010855	0.061462	0.001942	0.01573	0.003187	0.064596	0.047941	0.015633	0.054196	0.09147	0.049696	0.025048	0.112634	0.011058	0.019487	0.031553	0.041083	0.016368	0.018156	0.106992	0.02165	0.000733	0.001136	0.005385	0.027125	0.025782	0.0855	0.018636	0.030615	0.000823
Barueri	São Paulo	SE	5466	0.089554	0.254299	0.08992	0.054519	0.053421	0.097237	0.010703	0.033388	0.039426	0.06202	0.043176	0.027717	0.035767	0.008141	0.006037	9.1e-05	0.010611	0.064307	0.001281	0.015642	0.002744	0.063535	0.052197	0.01691	0.056145	0.091506	0.047088	0.019387	0.114168	0.01051	0.017551	0.034287	0.051197	0.012806	0.019656	0.095149	0.018563	0.000672	0.001647	0.007044	0.028071	0.025147	0.081918	0.024685	0.032076	0.001189
Bauru	São Paulo	SE	9452	0.088693	0.262227	0.09008	0.054131	0.046736	0.106789	0.012985	0.035016	0.044203	0.05595	0.04318	0.033336	0.031239	0.006242	0.004297	5.3e-05	0.008789	0.057683	0.001693	0.008243	0.00127	0.064551	0.048644	0.018239	0.051155	0.084187	0.053289	0.022549	0.122982	0.01001	0.021858	0.032054	0.046807	0.013964	0.009829	0.105393	0.015448	0.000264	0.00238	0.005531	0.028935	0.025044	0.08905	0.021134	0.021858	0.00164
Birigui	São Paulo	SE	7337	0.097955	0.250449	0.091145	0.057112	0.048244	0.098954	0.01442	0.034722	0.046368	0.055409	0.04425	0.032953	0.030366	0.008368	0.005997	0	0.008504	0.057465	0.001704	0.012587	0.001908	0.067341	0.050734	0.015866	0.047259	0.088999	0.055851	0.018042	0.124199	0.011517	0.023962	0.032679	0.046315	0.015184	0.013479	0.105111	0.017031	0.00075	0.002249	0.005043	0.029609	0.025956	0.08294	0.019401	0.025126	0.000954
Bragança Paulista	São Paulo	SE	3669	0.099616	0.260865	0.092464	0.054361	0.045681	0.093834	0.015263	0.04538	0.048561	0.046256	0.040642	0.02885	0.026394	0.006756	0.004497	0.000136	0.008994	0.070619	0.002044	0.005179	0.00109	0.06485	0.045932	0.014524	0.056156	0.088275	0.060546	0.0203	0.121791	0.010221	0.026925	0.032298	0.040604	0.015399	0.009943	0.106375	0.018931	0.000681	0.003271	0.004088	0.035232	0.027023	0.081989	0.020394	0.01715	0.00218
Caçapava	São Paulo	SE	349	0.098339	0.258464	0.098425	0.054293	0.04298	0.088446	0.007163	0.040115	0.048547	0.044413	0.052857	0.031279	0.028394	0.015759	0.002865	0	0.011461	0.067335	0.001433	0.002865	0.001433	0.067306	0.04298	0.011461	0.06014	0.080205	0.044391	0.020057	0.113138	0.010029	0.025788	0.035817	0.051576	0.02149	0.007163	0.118862	0.020057	0	0.002865	0.004298	0.028653	0.031427	0.077339	0.020057	0.031519	0
Caieiras	São Paulo	SE	1127	0.086821	0.252942	0.084093	0.051834	0.058075	0.092039	0.011535	0.032387	0.044668	0.065118	0.039866	0.033237	0.036345	0.010648	0.005324	0	0.014197	0.058941	0.001775	0.015084	0.003549	0.073488	0.043427	0.017303	0.05614	0.098078	0.046043	0.02832	0.098249	0.008698	0.018975	0.030169	0.038097	0.015084	0.02307	0.112052	0.019766	0	0.001331	0.005324	0.027875	0.024317	0.071232	0.023514	0.03346	0
Cajamar	São Paulo	SE	425	0.094182	0.2432	0.080603	0.06	0.056098	0.11324	0.009412	0.029412	0.03428	0.047059	0.038824	0.021054	0.046979	0.010937	0.009412	0	0.003529	0.073503	0.003529	0.010588	0.001176	0.064604	0.065732	0.007059	0.051639	0.08816	0.047059	0.025882	0.122133	0.004706	0.014118	0.037647	0.046921	0.007059	0.014118	0.095189	0.010588	0	0	0.004706	0.032845	0.030485	0.101044	0.015294	0.042277	0
Campinas	São Paulo	SE	32584	0.096717	0.256056	0.092821	0.056913	0.049847	0.10065	0.013275	0.035449	0.045896	0.052494	0.041907	0.033202	0.030274	0.006761	0.003839	4.6e-05	0.008851	0.057169	0.002332	0.010708	0.001719	0.065137	0.051876	0.017726	0.052151	0.084938	0.054159	0.022058	0.1208	0.010656	0.022852	0.030332	0.043123	0.015098	0.013037	0.108041	0.016478	0.000984	0.002072	0.005404	0.031072	0.023356	0.087934	0.018606	0.022267	0.001168
Campo Limpo Paulista	São Paulo	SE	754	0.086302	0.274828	0.09128	0.054681	0.046674	0.116985	0.009947	0.039322	0.040963	0.049475	0.041479	0.025199	0.02765	0.003979	0.001326	0	0.009947	0.061345	0.001989	0.01061	0	0.055505	0.055505	0.015252	0.051968	0.104321	0.050073	0.028515	0.13403	0.011936	0.02101	0.026346	0.04244	0.013263	0.013263	0.091665	0.025679	0.000663	0.001989	0.005968	0.023012	0.027504	0.082329	0.020557	0.015915	0
Caraguatatuba	São Paulo	SE	1246	0.095506	0.250401	0.091894	0.056982	0.048154	0.086677	0.008828	0.036918	0.050562	0.051766	0.048154	0.036517	0.028491	0.005618	0.007223	0.000401	0.008427	0.066212	0.00321	0.014848	0.00321	0.068847	0.051979	0.017966	0.060637	0.084359	0.036012	0.017657	0.127333	0.010032	0.016854	0.043117	0.043608	0.011637	0.01565	0.107986	0.017255	0.000803	0.001204	0.005618	0.027623	0.025281	0.080508	0.01716	0.031701	0.000401
Carapicuíba	São Paulo	SE	5383	0.079054	0.243639	0.084531	0.051849	0.055575	0.088398	0.012382	0.031967	0.04279	0.069842	0.041698	0.027759	0.039131	0.010181	0.008226	0.000372	0.012415	0.074868	0.001486	0.018156	0.002415	0.064085	0.043011	0.014729	0.057609	0.104217	0.040312	0.020869	0.114676	0.011611	0.018451	0.029564	0.048007	0.011308	0.024243	0.097319	0.021212	9.3e-05	0.001672	0.007245	0.026225	0.024509	0.07564	0.021055	0.031952	0.000279
Catanduva	São Paulo	SE	7739	0.100917	0.258431	0.095943	0.055369	0.044192	0.104342	0.014537	0.041543	0.044838	0.053883	0.035922	0.036826	0.027911	0.004781	0.003618	0	0.009627	0.056338	0.001744	0.007818	0.001421	0.067506	0.05205	0.018284	0.047968	0.080351	0.059797	0.017548	0.128963	0.010836	0.025751	0.03141	0.039167	0.014637	0.01297	0.109116	0.016047	6.5e-05	0.002067	0.004781	0.032034	0.022497	0.08834	0.017548	0.020717	0.000646
Cotia	São Paulo	SE	1825	0.088715	0.251217	0.09221	0.058239	0.049258	0.111071	0.009263	0.033375	0.046801	0.05392	0.046289	0.037245	0.032329	0.006027	0.003288	0	0.009041	0.055017	0.001644	0.011233	0.00274	0.075559	0.050533	0.016732	0.052366	0.083075	0.049554	0.021259	0.108883	0.007491	0.023014	0.030331	0.044321	0.016986	0.011475	0.112095	0.016164	0.001672	0.00274	0.006849	0.029409	0.023799	0.084842	0.021096	0.022358	0.002192
Cubatão	São Paulo	SE	2083	0.078433	0.249509	0.088311	0.050465	0.057652	0.086427	0.006548	0.027032	0.04726	0.070317	0.049499	0.027236	0.033845	0.012687	0.007681	0	0.013682	0.062238	0.00312	0.016682	0.00288	0.071282	0.044108	0.015362	0.054341	0.097066	0.037412	0.019866	0.105323	0.010802	0.016256	0.029881	0.053404	0.012402	0.018966	0.113039	0.022084	0.00024	0.00216	0.007573	0.026599	0.024387	0.070156	0.024868	0.030163	0.00048
Diadema	São Paulo	SE	2916	0.088952	0.253689	0.083135	0.055192	0.059825	0.098037	0.010802	0.031875	0.044912	0.058782	0.041827	0.025544	0.035827	0.012517	0.005316	0.000171	0.010288	0.063598	0.001372	0.015082	0.002915	0.06134	0.047518	0.012346	0.059224	0.104731	0.038654	0.020919	0.111951	0.011926	0.016632	0.03248	0.049099	0.012174	0.017433	0.106304	0.016804	0.000343	0.001372	0.005316	0.030795	0.028274	0.075013	0.017805	0.029782	0.0012
Embu das Artes	São Paulo	SE	1221	0.084357	0.239558	0.092138	0.052826	0.056102	0.0905	0.012285	0.034398	0.039722	0.061425	0.054054	0.028256	0.03317	0.009009	0.006962	0	0.014333	0.070844	0.002048	0.015971	0.002048	0.073382	0.043935	0.009419	0.05093	0.103977	0.044128	0.020066	0.11026	0.014742	0.014742	0.028152	0.045241	0.010647	0.019387	0.105176	0.02434	0.001229	0.001638	0.004505	0.031026	0.024456	0.068086	0.022812	0.038002	0.002048
Fernandópolis	São Paulo	SE	8348	0.100559	0.255558	0.089939	0.061966	0.048136	0.104394	0.013244	0.036592	0.040449	0.052261	0.040195	0.033586	0.029459	0.006741	0.004732	0.00018	0.009518	0.055149	0.002336	0.00948	0.002815	0.06545	0.054939	0.017813	0.050975	0.084581	0.062442	0.022547	0.125262	0.010219	0.020248	0.032213	0.043959	0.013898	0.011817	0.099921	0.014859	0.000719	0.001569	0.004013	0.025718	0.02232	0.093268	0.019991	0.024567	0.000898
Ferraz de Vasconcelos	São Paulo	SE	1910	0.075776	0.243851	0.094517	0.051198	0.06269	0.088316	0.01178	0.030569	0.043675	0.066639	0.044419	0.033897	0.033978	0.009084	0.006283	0	0.012827	0.071344	0.001832	0.013029	0.002356	0.069261	0.044443	0.015318	0.053368	0.094697	0.052105	0.018209	0.102197	0.010733	0.018325	0.027749	0.042275	0.014136	0.01742	0.108825	0.026963	0	0.001047	0.007853	0.028883	0.02405	0.082845	0.014003	0.034137	0.001862
Franca	São Paulo	SE	17767	0.095306	0.255216	0.090178	0.056412	0.052741	0.091862	0.011145	0.034689	0.048912	0.055359	0.036716	0.033157	0.03083	0.00815	0.005629	8.4e-05	0.011465	0.06234	0.00121	0.013657	0.002251	0.066706	0.054859	0.015621	0.057198	0.082774	0.047981	0.021261	0.113894	0.00998	0.020689	0.028419	0.038871	0.018492	0.017329	0.111394	0.022129	0.000281	0.002829	0.006268	0.029396	0.027979	0.088068	0.016199	0.02285	0.000338
Francisco Morato	São Paulo	SE	2729	0.084778	0.238775	0.078924	0.051317	0.064955	0.09221	0.009161	0.026317	0.042829	0.06379	0.048822	0.026501	0.033788	0.012459	0.011788	0.00055	0.010866	0.072969	0.001832	0.020807	0.003664	0.071819	0.048058	0.01421	0.047889	0.111697	0.049698	0.015352	0.098664	0.010392	0.016673	0.033529	0.049005	0.013925	0.019756	0.094214	0.022169	0	0.001466	0.008	0.024918	0.024342	0.079872	0.017406	0.035836	0.000183
Franco da Rocha	São Paulo	SE	3547	0.082323	0.255991	0.089512	0.051029	0.052862	0.091204	0.00733	0.029039	0.04539	0.069636	0.045109	0.030871	0.032845	0.010713	0.008176	0	0.012828	0.066676	0.002114	0.014801	0.001551	0.069745	0.040738	0.017158	0.056329	0.110121	0.042112	0.018814	0.106361	0.009867	0.01518	0.031708	0.047504	0.013392	0.02111	0.101509	0.025708	0	0.002396	0.007471	0.025879	0.024435	0.075146	0.019699	0.029328	0
Guaratinguetá	São Paulo	SE	591	0.10112	0.274969	0.099285	0.046284	0.049444	0.084198	0.007614	0.037781	0.052453	0.049444	0.046035	0.038637	0.029796	0.006768	0.006768	0	0.010152	0.042091	0.001692	0.005076	0.000846	0.060007	0.059946	0.005922	0.067464	0.089428	0.053232	0.032149	0.108825	0.009306	0.019459	0.039585	0.036283	0.015883	0.009882	0.108117	0.014382	0	0.000846	0.00846	0.028647	0.025381	0.090401	0.021997	0.021151	0.000846
Guarujá	São Paulo	SE	2704	0.080436	0.244822	0.090052	0.05159	0.06287	0.094305	0.01128	0.029586	0.044194	0.068972	0.039386	0.032729	0.037722	0.008691	0.007396	0	0.012389	0.061206	0.001664	0.018306	0.002404	0.076183	0.039016	0.013868	0.055843	0.099112	0.048817	0.018676	0.115754	0.006842	0.018676	0.032359	0.044564	0.014053	0.02071	0.106879	0.020155	0.000555	0.001849	0.005547	0.029031	0.024223	0.0723	0.018491	0.030325	0.00037
Guarulhos	São Paulo	SE	16519	0.086972	0.254206	0.087247	0.055385	0.053479	0.097321	0.011704	0.034755	0.043241	0.058463	0.042366	0.033058	0.031469	0.01014	0.006197	3e-05	0.011669	0.062648	0.002149	0.014434	0.001937	0.065603	0.048648	0.016695	0.054318	0.096411	0.047231	0.019342	0.115608	0.01096	0.019767	0.0307	0.046793	0.014181	0.016024	0.106729	0.019621	0.000908	0.00221	0.006841	0.028088	0.023447	0.082016	0.01899	0.026523	0.001126
Hortolândia	São Paulo	SE	4333	0.089084	0.255366	0.089661	0.053427	0.055966	0.08943	0.012462	0.032426	0.043965	0.065197	0.042926	0.036695	0.030233	0.009347	0.006577	0.000231	0.011886	0.060235	0.0015	0.011539	0.001846	0.0598	0.045745	0.0187	0.057484	0.092579	0.048536	0.025134	0.116312	0.012693	0.018639	0.035659	0.046234	0.013813	0.016874	0.104522	0.01838	0.000462	0.001385	0.006231	0.030755	0.02153	0.076982	0.019359	0.029599	0.000346
Indaiatuba	São Paulo	SE	4637	0.097322	0.257575	0.099827	0.056391	0.04526	0.100879	0.012077	0.035276	0.047206	0.052707	0.046581	0.031975	0.026969	0.006038	0.003343	0.000108	0.009381	0.054188	0.00248	0.009772	0.001725	0.0692	0.052282	0.016843	0.050817	0.084904	0.051524	0.018834	0.124659	0.01079	0.021509	0.032947	0.044382	0.012292	0.011765	0.110486	0.014988	0.001186	0.00248	0.004852	0.027574	0.024279	0.09561	0.017792	0.021359	0.001633
Itanhaém	São Paulo	SE	2802	0.092626	0.235231	0.087954	0.053279	0.056721	0.096179	0.010885	0.033451	0.049705	0.059619	0.043403	0.033688	0.037063	0.008922	0.004996	0	0.014276	0.065027	0.001606	0.01191	0.001428	0.067273	0.041934	0.015882	0.054604	0.100107	0.041756	0.018201	0.114739	0.009636	0.020699	0.033369	0.0505	0.014097	0.015703	0.10546	0.021413	0.000892	0.003034	0.005889	0.028729	0.027837	0.07334	0.020699	0.026231	0.000714
Itapecerica da Serra	São Paulo	SE	675	0.099078	0.238196	0.085092	0.065125	0.055485	0.084374	0.012593	0.033333	0.039211	0.057003	0.038469	0.036191	0.044444	0.007202	0.004444	0	0.012593	0.07023	0.002963	0.011111	0.001481	0.070968	0.050919	0.00963	0.055466	0.095752	0.039139	0.021481	0.117237	0.011852	0.019259	0.030965	0.042739	0.011852	0.017778	0.107064	0.02259	0.000741	0.001481	0.008148	0.020741	0.028734	0.081908	0.017037	0.031111	0.001481
Itapetininga	São Paulo	SE	6089	0.101202	0.272086	0.09459	0.058434	0.036445	0.105928	0.009037	0.03595	0.037444	0.040044	0.061212	0.034097	0.031069	0.004927	0.003695	0	0.005337	0.057053	0.00115	0.005618	0.000657	0.064152	0.053431	0.011494	0.057408	0.099489	0.049025	0.021298	0.12653	0.008129	0.022532	0.053125	0.048652	0.012708	0.007855	0.095138	0.013941	0.000246	0.00156	0.010264	0.027817	0.029822	0.085006	0.019516	0.017229	0.000903
Itapevi	São Paulo	SE	1376	0.08565	0.237278	0.088913	0.051542	0.052941	0.095002	0.011265	0.03122	0.039559	0.068576	0.047135	0.030128	0.036674	0.011628	0.011265	0	0.014172	0.065695	0.001817	0.016662	0.001453	0.068314	0.041424	0.015625	0.053052	0.098474	0.048692	0.016715	0.106468	0.014172	0.018532	0.035247	0.042515	0.012718	0.026526	0.093023	0.025436	0	0.00218	0.005451	0.031977	0.026526	0.072674	0.021439	0.02907	0
Itaquaquecetuba	São Paulo	SE	1193	0.083494	0.235559	0.085859	0.042437	0.066201	0.092642	0.013831	0.025591	0.037142	0.065897	0.041288	0.030595	0.031677	0.012301	0.007963	0	0.014669	0.07508	0.000838	0.022213	0.003353	0.069752	0.049828	0.013412	0.053096	0.115732	0.045903	0.014841	0.104964	0.015088	0.018335	0.026324	0.041218	0.010897	0.017184	0.100593	0.026324	0.000419	0.000838	0.006287	0.029265	0.023889	0.083054	0.012154	0.029265	0.000419
Itu	São Paulo	SE	2615	0.095022	0.257603	0.08952	0.057974	0.046141	0.106674	0.011281	0.041093	0.048511	0.052274	0.038363	0.033231	0.028039	0.00478	0.005081	0	0.006883	0.060916	0.002677	0.009943	0.002103	0.05933	0.049118	0.014464	0.047227	0.091236	0.05696	0.019721	0.131283	0.009943	0.031242	0.034118	0.042236	0.012046	0.0117	0.100701	0.01849	0	0.003442	0.007457	0.031817	0.022462	0.091105	0.017664	0.023805	0.000765
Jacareí	São Paulo	SE	3689	0.089674	0.262792	0.086551	0.060283	0.049434	0.097791	0.008946	0.044022	0.048775	0.047809	0.046202	0.033057	0.025752	0.006912	0.004717	0	0.007997	0.068534	0.001626	0.007726	0.000813	0.068905	0.042751	0.018089	0.054359	0.087861	0.042794	0.023786	0.118597	0.01125	0.02041	0.032802	0.057064	0.013503	0.009697	0.103663	0.017713	0.000407	0.004337	0.00759	0.030332	0.026471	0.090775	0.015948	0.022392	0.000678
Jales	São Paulo	SE	4120	0.095418	0.260011	0.099422	0.058755	0.039783	0.104831	0.014879	0.038029	0.050429	0.050821	0.035416	0.034358	0.026998	0.006311	0.00534	0	0.008738	0.054754	0.002063	0.007646	0.001092	0.064141	0.052155	0.017939	0.051393	0.086436	0.067093	0.024497	0.122293	0.013442	0.023265	0.032699	0.044335	0.013592	0.010002	0.10935	0.015752	0.000728	0.001335	0.00534	0.024584	0.020286	0.089863	0.020874	0.019962	0.000871
Jandira	São Paulo	SE	1054	0.075427	0.263283	0.085863	0.058349	0.051708	0.088235	0.009013	0.029886	0.046015	0.063567	0.04981	0.028463	0.040797	0.010911	0.00759	0	0.010911	0.054554	0.003321	0.019924	0.002372	0.076836	0.043166	0.018975	0.060239	0.09629	0.044112	0.020862	0.118103	0.009488	0.020873	0.029882	0.051231	0.010436	0.01945	0.101987	0.018501	0	0.001898	0.008065	0.028459	0.026087	0.070671	0.022765	0.028459	0.000474
Jardinópolis	São Paulo	SE	1916	0.096816	0.252349	0.101775	0.060543	0.042797	0.102818	0.010438	0.033925	0.043058	0.056367	0.039405	0.033403	0.03523	0.004175	0.004436	0	0.010699	0.055063	0.001566	0.013309	0.001827	0.066	0.051745	0.020616	0.047281	0.08347	0.050008	0.01905	0.12505	0.014614	0.023659	0.035163	0.038235	0.014875	0.014782	0.105664	0.016743	0.000522	0.003132	0.003132	0.030571	0.02453	0.087434	0.017424	0.022863	0.000261
Jaú	São Paulo	SE	4873	0.100181	0.250886	0.095506	0.054324	0.043705	0.106348	0.013708	0.038803	0.046263	0.055399	0.039061	0.036056	0.032665	0.004858	0.003386	0.000103	0.009132	0.054235	0.001539	0.0081	0.001231	0.062939	0.049227	0.019691	0.048488	0.085481	0.061793	0.01927	0.133672	0.011857	0.025842	0.031482	0.041214	0.015186	0.012621	0.103082	0.016269	0.000205	0.003181	0.003386	0.031257	0.022959	0.084175	0.019784	0.023164	0
Jundiaí	São Paulo	SE	7727	0.100556	0.258509	0.094797	0.058043	0.040313	0.110975	0.01443	0.036819	0.044778	0.047043	0.044455	0.039666	0.027307	0.005371	0.0033	6.5e-05	0.00783	0.05772	0.001553	0.005953	0.000518	0.062508	0.052867	0.019089	0.047884	0.079656	0.06089	0.022389	0.130581	0.012359	0.02653	0.034619	0.041543	0.014171	0.007894	0.11091	0.013848	0.000776	0.001941	0.003624	0.030154	0.024201	0.089556	0.01993	0.016177	0.001553
Leme	São Paulo	SE	2261	0.111013	0.26161	0.098408	0.047103	0.035161	0.111676	0.018576	0.038921	0.046882	0.044007	0.040469	0.034277	0.025652	0.003538	0.002433	0.000663	0.009067	0.060593	0.00199	0.006855	0.001106	0.070886	0.051041	0.022741	0.043958	0.085483	0.064076	0.017912	0.12086	0.010836	0.026521	0.032924	0.047712	0.015897	0.01121	0.106063	0.013932	0.000663	0.00199	0.004202	0.031817	0.025808	0.082394	0.020124	0.019218	0.000442
Limeira	São Paulo	SE	10998	0.100352	0.259526	0.099342	0.055294	0.04357	0.095947	0.013909	0.035605	0.045208	0.050253	0.041783	0.033299	0.028399	0.00716	0.00541	4.5e-05	0.007001	0.059637	0.001955	0.01079	0.001682	0.063244	0.055273	0.018367	0.05161	0.0849	0.057147	0.019936	0.122104	0.012045	0.022295	0.033446	0.043728	0.012364	0.011568	0.111947	0.015776	0.000273	0.003243	0.005228	0.029757	0.023474	0.086028	0.017768	0.022102	0.000409
Mairiporã	São Paulo	SE	3843	0.088917	0.247431	0.081759	0.054332	0.059233	0.086033	0.010409	0.030258	0.045032	0.063388	0.052645	0.031376	0.03785	0.009306	0.007156	0.00013	0.011525	0.061306	0.002082	0.014215	0.001431	0.066384	0.043016	0.016263	0.055009	0.096406	0.051487	0.013661	0.126149	0.010539	0.020659	0.034909	0.042424	0.011407	0.017307	0.096579	0.020184	0.00026	0.002732	0.006245	0.028669	0.026734	0.073289	0.023108	0.026689	0.00039
Marília	São Paulo	SE	17145	0.094282	0.252588	0.086759	0.057876	0.04826	0.104753	0.013028	0.038448	0.042591	0.058018	0.042081	0.033917	0.030172	0.00707	0.005427	0.000146	0.008381	0.055838	0.001954	0.012181	0.0014	0.064593	0.049553	0.016064	0.053401	0.086336	0.053592	0.018806	0.1214	0.011977	0.023984	0.033747	0.048458	0.012369	0.014864	0.104038	0.017566	0.001026	0.002246	0.005659	0.027933	0.022389	0.084196	0.019543	0.023273	0.002252
Mauá	São Paulo	SE	3738	0.086544	0.255083	0.088015	0.062065	0.048689	0.098181	0.013777	0.032772	0.04053	0.062199	0.046148	0.030096	0.030096	0.007624	0.005484	0	0.010567	0.063804	0.001739	0.014179	0.002408	0.063712	0.047952	0.017234	0.05583	0.097359	0.051661	0.017882	0.113776	0.009497	0.023643	0.032857	0.046326	0.013376	0.018646	0.102684	0.017459	0.000134	0.001739	0.006287	0.025013	0.024431	0.082541	0.017502	0.027378	0.000268
Mirassol	São Paulo	SE	5050	0.098648	0.250899	0.093004	0.057035	0.048008	0.098855	0.014554	0.038039	0.04746	0.054373	0.037382	0.034935	0.033135	0.005941	0.005941	0	0.007426	0.060514	0.002673	0.008191	0.001485	0.06396	0.052871	0.018614	0.05396	0.084851	0.054158	0.019406	0.12198	0.010495	0.023663	0.032871	0.039703	0.014257	0.013366	0.10703	0.016436	0.000297	0.002574	0.00495	0.03	0.025347	0.090396	0.017723	0.026238	0.000495
Mogi das Cruzes	São Paulo	SE	3591	0.089655	0.260517	0.086623	0.061549	0.047907	0.109551	0.008568	0.049704	0.037363	0.048076	0.045476	0.034433	0.031755	0.004873	0.00362	0	0.006962	0.055048	0.001114	0.012008	0.001532	0.060188	0.043252	0.017349	0.051847	0.097154	0.046621	0.018497	0.116994	0.010856	0.025769	0.032891	0.059042	0.011697	0.012671	0.10211	0.017907	0.004456	0.000975	0.008076	0.027068	0.023625	0.088217	0.023254	0.018101	0.006274
Mogi Guaçu	São Paulo	SE	4143	0.110097	0.258567	0.094417	0.056547	0.041153	0.097151	0.012069	0.039007	0.04245	0.044804	0.044911	0.036908	0.028012	0.006924	0.004013	0	0.006396	0.058248	0.003259	0.008327	0.000845	0.064623	0.054364	0.016293	0.055567	0.091125	0.053271	0.023632	0.125978	0.0105	0.024467	0.032649	0.043493	0.014103	0.009704	0.100771	0.01229	0.000241	0.00181	0.007483	0.030248	0.02799	0.09189	0.016624	0.01519	0.000121
Mogi Mirim	São Paulo	SE	3633	0.102575	0.254658	0.094328	0.055388	0.041804	0.103423	0.015139	0.043049	0.045522	0.045374	0.042768	0.039474	0.028601	0.004404	0.003165	0	0.007515	0.0587	0.003165	0.008646	0.001376	0.063586	0.051958	0.015352	0.052636	0.088755	0.054396	0.020206	0.140094	0.010873	0.025379	0.035722	0.038174	0.008946	0.010515	0.105612	0.016928	0.000551	0.001652	0.004129	0.035046	0.019993	0.088735	0.017809	0.014556	0.000413
Nova Odessa	São Paulo	SE	1050	0.095743	0.259303	0.104079	0.071318	0.04448	0.09024	0.017619	0.0351	0.040415	0.055005	0.039938	0.032232	0.025443	0.005238	0.002857	0	0.008095	0.056576	0.000952	0.01	0.002381	0.063728	0.052793	0.014286	0.052218	0.087956	0.052381	0.022788	0.116423	0.013226	0.017055	0.032857	0.041388	0.016099	0.009386	0.101627	0.013333	0.000476	0.002857	0.005714	0.028515	0.028038	0.101272	0.029048	0.018571	0
Olímpia	São Paulo	SE	5489	0.091955	0.256822	0.101307	0.05445	0.040123	0.106964	0.012571	0.034152	0.042976	0.049977	0.039699	0.036264	0.032377	0.005603	0.00419	9.1e-05	0.008563	0.060406	0.002915	0.013744	0.002186	0.061544	0.05443	0.018711	0.049637	0.087204	0.061786	0.023032	0.124614	0.00844	0.021724	0.035909	0.04464	0.010722	0.012522	0.101467	0.015627	0.000455	0.001822	0.006741	0.026937	0.019915	0.089805	0.017178	0.023778	0.000455
Osasco	São Paulo	SE	10585	0.082552	0.25849	0.088527	0.052092	0.053729	0.09572	0.011654	0.035672	0.044319	0.061319	0.041869	0.029241	0.033313	0.007891	0.006636	0	0.01095	0.063163	0.001701	0.01515	0.002456	0.068905	0.044532	0.01446	0.054371	0.093889	0.046749	0.020355	0.115629	0.009118	0.019753	0.031895	0.045282	0.013094	0.01773	0.10374	0.019763	0.001288	0.002409	0.006188	0.027938	0.023077	0.082418	0.020672	0.02844	0.000945
Paulínia	São Paulo	SE	2589	0.081783	0.244387	0.093321	0.05591	0.051447	0.099743	0.014484	0.042132	0.048523	0.049383	0.042673	0.038708	0.033459	0.006566	0.003283	0	0.008304	0.063568	0.001545	0.013449	0.001738	0.065225	0.041316	0.02027	0.055594	0.088793	0.052296	0.023547	0.122958	0.011587	0.024706	0.033202	0.045755	0.014473	0.011394	0.105397	0.017951	0.000772	0.001159	0.004056	0.031275	0.027984	0.086475	0.018926	0.023353	0.001352
Piracicaba	São Paulo	SE	10810	0.102587	0.255046	0.104395	0.051715	0.04376	0.106668	0.014841	0.037781	0.044313	0.047982	0.042484	0.033863	0.029242	0.00696	0.003839	9.3e-05	0.008083	0.053468	0.001573	0.008629	0.001434	0.07222	0.054142	0.018906	0.049887	0.078563	0.060384	0.020853	0.134817	0.011884	0.026768	0.035553	0.039898	0.01272	0.009378	0.101486	0.01627	0.000185	0.00222	0.004394	0.03006	0.020298	0.089697	0.017715	0.018121	0.000694
Poá	São Paulo	SE	1937	0.094863	0.25695	0.085547	0.054583	0.057688	0.093727	0.009035	0.029603	0.03913	0.055923	0.040662	0.037171	0.028624	0.011616	0.006711	0	0.012648	0.065487	0.001033	0.014664	0.002581	0.066135	0.049688	0.016881	0.049456	0.095548	0.049003	0.019737	0.114116	0.010997	0.020842	0.026015	0.047999	0.017995	0.0167	0.102463	0.0167	0	0.001807	0.010325	0.03377	0.020909	0.080475	0.017037	0.028183	0.000258
Pontal	São Paulo	SE	673	0.082149	0.252732	0.087991	0.055678	0.063653	0.088394	0.013373	0.026348	0.033865	0.067947	0.035722	0.028205	0.027489	0.00984	0.009658	0	0.013373	0.071623	0.002229	0.013078	0.001486	0.060921	0.052006	0.023774	0.046062	0.089896	0.033432	0.027489	0.125557	0.01263	0.016345	0.040862	0.041605	0.006686	0.027489	0.106241	0.017831	0	0	0.006686	0.028975	0.014859	0.085438	0.024517	0.026003	0
Praia Grande	São Paulo	SE	4170	0.087203	0.24978	0.09381	0.050269	0.054879	0.095793	0.01033	0.032019	0.042799	0.059374	0.042383	0.032357	0.034325	0.008273	0.006715	0.00012	0.010812	0.064609	0.001679	0.016509	0.002158	0.066985	0.048046	0.018218	0.054875	0.102333	0.045546	0.022422	0.106778	0.010312	0.021205	0.031167	0.043984	0.014748	0.016644	0.108579	0.019058	0	0.002518	0.005995	0.03079	0.02325	0.078138	0.020599	0.02935	0.000839
Presidente Prudente	São Paulo	SE	33591	0.092134	0.246102	0.091252	0.057055	0.04892	0.106333	0.011528	0.036406	0.043524	0.05619	0.043923	0.032072	0.032787	0.008715	0.004596	0	0.009397	0.059166	0.002129	0.012336	0.001998	0.068277	0.050594	0.015668	0.051264	0.088867	0.048578	0.020088	0.118428	0.010924	0.021816	0.033357	0.048124	0.012288	0.015114	0.101848	0.017207	0.001134	0.001786	0.006835	0.027661	0.023636	0.084293	0.02131	0.025516	0.002967
Ribeirão Pires	São Paulo	SE	2424	0.085191	0.239958	0.088292	0.057792	0.058558	0.095487	0.011551	0.037931	0.055438	0.060657	0.041149	0.032306	0.031066	0.008251	0.00693	0	0.010107	0.057027	0.001238	0.016456	0.002269	0.071862	0.046504	0.016869	0.053274	0.09218	0.050603	0.023309	0.114419	0.009695	0.016869	0.026372	0.044436	0.01052	0.018316	0.112426	0.019556	0	0.001444	0.005363	0.026403	0.025688	0.084746	0.019596	0.026071	0.000619
Ribeirão Preto	São Paulo	SE	32937	0.091951	0.255793	0.095849	0.057639	0.049013	0.10168	0.013101	0.036374	0.044409	0.053178	0.039141	0.03426	0.031749	0.007015	0.004493	6.1e-05	0.010059	0.057212	0.001943	0.010053	0.001795	0.065887	0.050865	0.018344	0.051751	0.082739	0.054959	0.02406	0.119521	0.01109	0.022026	0.031733	0.040799	0.014632	0.013022	0.110667	0.016824	0.000729	0.00214	0.004706	0.029247	0.02436	0.090202	0.0178	0.023626	0.001047
Rio Claro	São Paulo	SE	4587	0.10166	0.263537	0.102463	0.060076	0.045715	0.102664	0.015152	0.038552	0.040522	0.049	0.039375	0.035271	0.027231	0.004318	0.003379	0.000109	0.00654	0.051477	0.00245	0.007303	0.001853	0.06101	0.054525	0.016985	0.045488	0.079949	0.058292	0.023405	0.133278	0.012535	0.023966	0.028629	0.044134	0.014015	0.008763	0.107064	0.014015	0.000872	0.002616	0.004469	0.034358	0.021659	0.092161	0.016985	0.018204	0.000436
Salto	São Paulo	SE	3764	0.088943	0.265675	0.095569	0.055981	0.049213	0.091551	0.00994	0.031192	0.042452	0.057458	0.04458	0.034773	0.034507	0.006775	0.005048	0	0.008875	0.060485	0.001461	0.011557	0.002922	0.06194	0.04335	0.015355	0.05903	0.089071	0.053585	0.020105	0.116775	0.012023	0.022848	0.036865	0.048702	0.014878	0.01485	0.104859	0.013948	0.000133	0.001727	0.007393	0.027681	0.027863	0.089249	0.020259	0.020946	0.000133
Santa Bárbara d'Oeste	São Paulo	SE	3377	0.100158	0.260225	0.092756	0.056677	0.045713	0.099402	0.012289	0.035501	0.044978	0.055178	0.043331	0.032218	0.026198	0.006959	0.003553	0	0.008736	0.063752	0.001925	0.008711	0.000888	0.061593	0.055227	0.017027	0.047083	0.085579	0.053894	0.023097	0.12215	0.009624	0.021173	0.034794	0.041457	0.011105	0.014658	0.102754	0.018804	0.000148	0.002517	0.004442	0.02976	0.025911	0.098756	0.017767	0.025466	0.000148
Santa Isabel	São Paulo	SE	235	0.110936	0.197254	0.099651	0.065957	0.03617	0.114638	0.008511	0.032817	0.050062	0.051064	0.046861	0.030239	0.025532	0.010638	0	0	0.008863	0.067237	0	0.017021	0.004255	0.075968	0.042046	0.012766	0.053191	0.099752	0.059188	0.023404	0.091221	0.012766	0.017021	0.023404	0.048022	0.019149	0.012766	0.10164	0.021277	0.002128	0.002128	0.010638	0.025532	0.02766	0.086391	0.014894	0.019149	0.002128
Santana de Parnaíba	São Paulo	SE	1555	0.097593	0.264363	0.086816	0.055026	0.043272	0.106474	0.015942	0.038114	0.047076	0.047918	0.039433	0.039183	0.030868	0.004823	0.00418	0	0.009325	0.049918	0.001608	0.009968	0.002304	0.064699	0.046748	0.020782	0.052332	0.072255	0.057544	0.024759	0.12763	0.009646	0.029072	0.037062	0.042875	0.014469	0.010932	0.10752	0.014323	0.000965	0.003537	0.005242	0.025621	0.021959	0.086588	0.016124	0.02046	0.000965
Santo André	São Paulo	SE	8154	0.098262	0.257412	0.093153	0.057012	0.040945	0.104422	0.014797	0.041333	0.048032	0.050428	0.040171	0.036583	0.030713	0.005887	0.004076	6.1e-05	0.008278	0.052743	0.002146	0.009853	0.001472	0.067763	0.051191	0.019473	0.051914	0.0816	0.057298	0.024253	0.123237	0.011074	0.023747	0.033695	0.044405	0.013809	0.010003	0.105231	0.013959	0.001349	0.002146	0.004599	0.030041	0.024934	0.090403	0.017713	0.017519	0.002391
Santos	São Paulo	SE	15669	0.093938	0.258735	0.096243	0.057535	0.046238	0.105873	0.011944	0.036756	0.049665	0.048991	0.035755	0.035619	0.031935	0.007069	0.003861	6.4e-05	0.008889	0.055177	0.001978	0.00894	0.001564	0.066272	0.051537	0.015778	0.060364	0.081595	0.050972	0.021769	0.121092	0.010221	0.024109	0.030714	0.040952	0.012918	0.009785	0.115911	0.016402	0.000447	0.002712	0.004784	0.032206	0.028291	0.085459	0.016362	0.022012	0.00087
São Bernardo do Campo	São Paulo	SE	13199	0.091235	0.247908	0.094324	0.061053	0.047146	0.10584	0.0146	0.037434	0.043256	0.054773	0.041802	0.03502	0.029385	0.007516	0.004091	0	0.008464	0.055699	0.001591	0.011745	0.001553	0.067759	0.051395	0.017922	0.051361	0.084665	0.052969	0.020547	0.124962	0.010684	0.021791	0.031976	0.044237	0.014175	0.01213	0.105312	0.016433	0.000953	0.002765	0.006727	0.030462	0.024095	0.083443	0.019992	0.023363	0.001942
São Caetano do Sul	São Paulo	SE	2401	0.095309	0.257345	0.093755	0.064159	0.041851	0.106603	0.017014	0.037876	0.044001	0.050003	0.037	0.034669	0.031653	0.004373	0.002082	0	0.009163	0.05787	0.001458	0.008538	0.001666	0.063494	0.052093	0.019575	0.049504	0.069955	0.067657	0.021951	0.122366	0.009996	0.024915	0.032427	0.049168	0.014369	0.008538	0.110961	0.018278	0.000416	0.003332	0.00354	0.028221	0.026968	0.090155	0.017493	0.018904	0.002291
São Carlos	São Paulo	SE	15095	0.100397	0.256489	0.10093	0.057384	0.039766	0.115097	0.012781	0.040764	0.045995	0.046753	0.037189	0.036953	0.029239	0.00573	0.00308	0	0.008115	0.050095	0.002782	0.008309	0.001822	0.064247	0.054981	0.019717	0.050563	0.077253	0.060548	0.023117	0.130951	0.010873	0.025617	0.029586	0.041847	0.015154	0.008274	0.107288	0.013815	0.001126	0.001855	0.005182	0.029407	0.021425	0.091832	0.018578	0.016861	0.00106
São José do Rio Preto	São Paulo	SE	24330	0.098706	0.258099	0.094234	0.058316	0.04435	0.103145	0.012436	0.03832	0.04598	0.051129	0.038607	0.035593	0.031148	0.005836	0.005008	0.000103	0.007887	0.056954	0.001911	0.008947	0.002035	0.065219	0.052727	0.017528	0.052545	0.080998	0.058079	0.022642	0.124783	0.01176	0.022929	0.033102	0.041851	0.01472	0.012315	0.106034	0.015918	0.00066	0.002096	0.004996	0.029371	0.023659	0.089004	0.017783	0.021392	0.001098
São José dos Campos	São Paulo	SE	6707	0.096245	0.276653	0.089033	0.057784	0.039131	0.10023	0.008126	0.035014	0.048514	0.04442	0.05184	0.034067	0.028737	0.006113	0.004473	7.5e-05	0.007082	0.056903	0.001491	0.010191	0.001715	0.063916	0.052739	0.015613	0.05607	0.091937	0.042949	0.023106	0.123975	0.010484	0.020541	0.037052	0.053545	0.013545	0.009783	0.112834	0.014695	0.001193	0.00246	0.008286	0.028829	0.02103	0.082819	0.015688	0.021221	0.002684
São Paulo	São Paulo	SE	161701	0.091413	0.256544	0.091246	0.057374	0.048928	0.106315	0.011753	0.0373	0.043811	0.054019	0.039883	0.032595	0.031853	0.007212	0.004486	7.7e-05	0.009554	0.056534	0.002178	0.011214	0.001646	0.066928	0.048173	0.01675	0.052483	0.086319	0.050858	0.021111	0.119309	0.011066	0.022737	0.030062	0.046674	0.013769	0.012856	0.106959	0.017155	0.001562	0.002386	0.005904	0.029664	0.024718	0.083519	0.020727	0.023923	0.002796
São Vicente	São Paulo	SE	5872	0.082884	0.252838	0.091304	0.050998	0.056066	0.089231	0.009622	0.033261	0.043906	0.066514	0.040471	0.031076	0.033039	0.008515	0.007874	0.000255	0.012772	0.065175	0.002146	0.015468	0.002469	0.071056	0.044534	0.015393	0.056861	0.095813	0.046815	0.018257	0.104186	0.009111	0.019452	0.031603	0.044744	0.014305	0.01918	0.11318	0.019522	0.000341	0.00298	0.006046	0.02948	0.024714	0.076818	0.016995	0.033896	0.000255
Sertãozinho	São Paulo	SE	5528	0.093468	0.265044	0.091035	0.052238	0.050214	0.08882	0.013386	0.029867	0.038169	0.062919	0.037784	0.032721	0.028757	0.01004	0.007688	0.000181	0.007145	0.069111	0.00199	0.011349	0.001719	0.062411	0.053702	0.019037	0.053391	0.083836	0.054529	0.020396	0.123102	0.010582	0.016499	0.034219	0.037052	0.012993	0.018625	0.108117	0.016861	0.000181	0.001538	0.004922	0.024996	0.019624	0.090374	0.022005	0.030183	0.000275
Sorocaba	São Paulo	SE	25286	0.096481	0.257792	0.093363	0.057537	0.0452	0.107662	0.010607	0.038875	0.043949	0.047273	0.048244	0.031159	0.029341	0.005466	0.00433	0	0.007733	0.059995	0.001859	0.00822	0.001424	0.064795	0.05049	0.016002	0.055685	0.092088	0.049702	0.021119	0.120981	0.010821	0.02678	0.039137	0.04401	0.013651	0.012089	0.100637	0.017983	0.000613	0.002847	0.006907	0.027442	0.026406	0.0842	0.02032	0.021968	0.001256
Sumaré	São Paulo	SE	4453	0.088364	0.25727	0.090172	0.052558	0.05509	0.094878	0.011488	0.031894	0.045994	0.059909	0.042768	0.032405	0.03302	0.008534	0.005277	0.000112	0.010473	0.061792	0.001572	0.012089	0.001347	0.073635	0.047252	0.015961	0.056106	0.094698	0.047013	0.021631	0.116952	0.011188	0.019032	0.032751	0.039896	0.013474	0.015961	0.100308	0.018525	0.000225	0.001909	0.006231	0.030821	0.026006	0.085344	0.020184	0.026322	0.000343
Suzano	São Paulo	SE	2482	0.084206	0.257051	0.090451	0.06386	0.048147	0.101128	0.011281	0.033239	0.040492	0.05701	0.042707	0.031829	0.033844	0.006849	0.006446	0.000201	0.007857	0.067083	0.001209	0.014102	0.001007	0.066154	0.050633	0.021527	0.059886	0.102168	0.047111	0.015713	0.116888	0.008058	0.02314	0.031406	0.052855	0.010274	0.014263	0.098535	0.020084	0.002015	0.001612	0.006648	0.029772	0.025156	0.075179	0.017896	0.024728	0.003022
Taboão da Serra	São Paulo	SE	2065	0.085872	0.24822	0.088304	0.050395	0.050703	0.100573	0.011138	0.029503	0.043248	0.062292	0.044684	0.030417	0.032358	0.0105	0.007264	0.000242	0.00799	0.066303	0.002179	0.016452	0.002179	0.06586	0.050605	0.015254	0.050605	0.090073	0.044794	0.022518	0.121792	0.010896	0.017433	0.031719	0.050605	0.014044	0.015012	0.098063	0.018402	0.000969	0.002663	0.008232	0.026634	0.028571	0.081598	0.016223	0.032688	0.002179
Tatuí	São Paulo	SE	4712	0.102233	0.271473	0.09394	0.048745	0.037527	0.104663	0.00955	0.034536	0.03689	0.044932	0.061505	0.030098	0.030525	0.004669	0.002759	0	0.010229	0.060586	0.000955	0.005895	0.000637	0.066404	0.051342	0.009868	0.053791	0.100788	0.052136	0.02339	0.121613	0.010293	0.025197	0.056622	0.041672	0.012521	0.009762	0.08872	0.014071	0.000531	0.002228	0.009177	0.02543	0.027534	0.083081	0.018569	0.022659	0.000531
Taubaté	São Paulo	SE	3822	0.097218	0.26025	0.089141	0.047378	0.042658	0.103298	0.007718	0.045712	0.051693	0.04473	0.051288	0.034686	0.026667	0.005495	0.00484	0.000262	0.006353	0.065265	0.001439	0.010424	0.001047	0.060022	0.058195	0.015299	0.058064	0.093504	0.043274	0.022749	0.126837	0.011111	0.022613	0.038843	0.039762	0.007718	0.009288	0.108268	0.016471	0.000916	0.000916	0.009027	0.028639	0.025489	0.086311	0.019362	0.023015	0.000523
Valinhos	São Paulo	SE	2491	0.109234	0.257966	0.10101	0.068282	0.038749	0.102588	0.012646	0.03768	0.041044	0.047791	0.03725	0.039381	0.030174	0.004014	0.002208	0	0.008029	0.050675	0.001204	0.006222	0.000803	0.063151	0.055922	0.020691	0.053648	0.07901	0.061688	0.023685	0.128776	0.010036	0.028454	0.03017	0.042577	0.012391	0.009235	0.102295	0.016186	0.000201	0.001606	0.004617	0.030123	0.023428	0.090121	0.020474	0.014853	0.001004
Várzea Paulista	São Paulo	SE	762	0.082279	0.2516	0.086105	0.06998	0.050878	0.096539	0.011811	0.041637	0.041339	0.047028	0.045164	0.036346	0.032808	0.00853	0.005249	0	0.009186	0.063145	0.001312	0.011155	0.003281	0.079391	0.045928	0.014436	0.045276	0.098419	0.043963	0.023618	0.127944	0.010499	0.019685	0.036087	0.054462	0.009843	0.015086	0.101698	0.014436	0.000656	0.001969	0.007218	0.024931	0.020337	0.082016	0.020993	0.024278	0.001312
Votorantim	São Paulo	SE	5106	0.09727	0.260737	0.099284	0.057865	0.044251	0.107178	0.009009	0.035656	0.039648	0.042651	0.053933	0.030292	0.029258	0.003721	0.003525	0	0.007051	0.06359	0.001469	0.007332	0.001567	0.062471	0.049953	0.011587	0.056122	0.095701	0.04768	0.021298	0.129438	0.010478	0.024994	0.048609	0.04863	0.013122	0.009854	0.094946	0.017724	0.000685	0.002546	0.008185	0.023855	0.026824	0.085807	0.01868	0.020597	0.000588
Votuporanga	São Paulo	SE	7298	0.100681	0.258371	0.096828	0.058307	0.04331	0.101053	0.013525	0.035445	0.046202	0.052725	0.039669	0.033393	0.030113	0.006372	0.004179	6.9e-05	0.00737	0.056366	0.001987	0.009086	0.002124	0.067315	0.052701	0.017415	0.04969	0.082988	0.054604	0.026084	0.120436	0.010495	0.022046	0.031214	0.042149	0.014719	0.01202	0.109134	0.014915	0.000685	0.001987	0.006008	0.028596	0.026414	0.094912	0.01866	0.021261	0.001096
Almirante Tamandaré	Paraná	SO	3296	0.094245	0.262468	0.093484	0.047953	0.044401	0.100015	0.015127	0.032977	0.045216	0.044875	0.064721	0.029479	0.029352	0.006755	0.003944	0	0.007737	0.063173	0.001365	0.007888	0.00182	0.068326	0.051447	0.01982	0.054622	0.096847	0.043881	0.024088	0.121765	0.010316	0.024941	0.03778	0.051398	0.012218	0.010773	0.104644	0.016417	0	0.002579	0.010391	0.020124	0.021947	0.081216	0.026832	0.016112	0.000152
Arapongas	Paraná	SO	2801	0.101399	0.258766	0.097315	0.05809	0.039588	0.103025	0.014995	0.03509	0.04416	0.050296	0.0426	0.033707	0.028488	0.006905	0.003927	0	0.008925	0.058297	0.002499	0.008698	0.001607	0.064812	0.054137	0.020312	0.049341	0.079611	0.059786	0.020596	0.132046	0.01472	0.024358	0.033843	0.044033	0.014638	0.009934	0.096147	0.014995	0.00125	0.001964	0.003392	0.027044	0.027074	0.091196	0.016557	0.021528	0.000918
Araucária	Paraná	SO	4585	0.101125	0.267867	0.104831	0.052238	0.042556	0.093648	0.019284	0.031455	0.045283	0.039795	0.055966	0.03001	0.023867	0.006434	0.005234	0.000218	0.008179	0.060158	0.001091	0.007487	0.001309	0.075596	0.063285	0.019161	0.050447	0.087697	0.052596	0.026273	0.109576	0.007306	0.023738	0.039749	0.053604	0.01145	0.009995	0.105228	0.014258	0.000218	0.001963	0.00807	0.025619	0.019499	0.080926	0.02551	0.018735	0.000218
Campo Largo	Paraná	SO	4274	0.09851	0.276321	0.10459	0.053947	0.034645	0.10587	0.021456	0.035985	0.035821	0.03723	0.059064	0.032175	0.02445	0.006131	0.002718	0	0.00854	0.049268	0.001287	0.006668	0.000819	0.068238	0.063152	0.024279	0.052355	0.088509	0.054764	0.026026	0.115876	0.010129	0.031542	0.033236	0.046167	0.011816	0.006317	0.101504	0.013606	0.000117	0.001872	0.009425	0.021407	0.019069	0.094088	0.025281	0.013178	0.000234
Cascavel	Paraná	SO	9891	0.105142	0.264062	0.104938	0.057904	0.037995	0.106965	0.01657	0.037751	0.041883	0.037241	0.04815	0.034359	0.028092	0.004448	0.002629	0	0.007229	0.05609	0.001567	0.005409	0.001112	0.075207	0.062034	0.021177	0.047026	0.084049	0.052219	0.028851	0.117836	0.011671	0.026929	0.036218	0.047631	0.011829	0.006713	0.110304	0.011968	0.000414	0.002275	0.008383	0.023948	0.020096	0.087738	0.021614	0.014087	0.000607
Colombo	Paraná	SO	9019	0.092672	0.263987	0.096778	0.04647	0.044066	0.105633	0.016648	0.029615	0.040988	0.039804	0.059996	0.030442	0.030269	0.00571	0.003548	0.000111	0.011864	0.063755	0.001719	0.010038	0.001552	0.068428	0.053204	0.015923	0.05821	0.0962	0.046666	0.022808	0.115638	0.008205	0.023998	0.039878	0.047766	0.013384	0.010273	0.102417	0.016673	0.000333	0.002162	0.011866	0.026155	0.018174	0.087381	0.022676	0.020687	0.000222
Curitiba	Paraná	SO	140873	0.100532	0.268268	0.101469	0.053888	0.038693	0.106884	0.018137	0.036759	0.041013	0.037896	0.052514	0.033174	0.026958	0.004539	0.002977	8.2e-05	0.007657	0.055918	0.00158	0.006362	0.001125	0.07419	0.056538	0.019371	0.048953	0.086754	0.051393	0.02736	0.120019	0.009631	0.025549	0.036568	0.050327	0.01253	0.007639	0.108652	0.013691	0.000678	0.002527	0.008266	0.024739	0.019569	0.085981	0.022199	0.015249	0.001087
Fazenda Rio Grande	Paraná	SO	2616	0.095067	0.259532	0.097727	0.052009	0.04485	0.098861	0.010999	0.031557	0.039122	0.048074	0.063864	0.030302	0.027477	0.008028	0.004969	0.000191	0.009948	0.058946	0.001911	0.009748	0.002294	0.065749	0.05065	0.017011	0.052943	0.095566	0.045298	0.022362	0.118693	0.009557	0.025803	0.042622	0.049121	0.014526	0.012232	0.093463	0.019878	0	0.003058	0.012041	0.024465	0.0237	0.090023	0.023509	0.020451	0
Foz do Iguaçu	Paraná	SO	9601	0.100471	0.262084	0.100569	0.052176	0.040831	0.106386	0.01479	0.033357	0.042496	0.042539	0.053423	0.03413	0.028086	0.005833	0.002968	0.000104	0.007488	0.061486	0.001875	0.006666	0.001198	0.077712	0.058115	0.018492	0.048917	0.08973	0.050035	0.024947	0.120864	0.011856	0.023785	0.037305	0.049788	0.012413	0.008164	0.108149	0.013889	0.000521	0.002864	0.008205	0.024136	0.019078	0.085453	0.018771	0.017121	0.000469
Londrina	Paraná	SO	40287	0.093404	0.259618	0.092802	0.060124	0.042749	0.113795	0.013003	0.040342	0.042519	0.045984	0.044145	0.033879	0.029608	0.005517	0.003429	5e-05	0.008046	0.055305	0.00144	0.008234	0.001353	0.067797	0.04935	0.016869	0.050701	0.085684	0.053202	0.021363	0.123946	0.010697	0.023869	0.033298	0.049661	0.01388	0.009521	0.105872	0.01451	0.002387	0.002209	0.006354	0.029068	0.024167	0.085857	0.022143	0.018658	0.003777
Maringá	Paraná	SO	30577	0.098181	0.260363	0.094657	0.057206	0.042086	0.109598	0.013969	0.040531	0.042861	0.048543	0.042009	0.033608	0.031389	0.005686	0.003095	6.6e-05	0.006924	0.054358	0.001586	0.008414	0.001196	0.06553	0.053331	0.019357	0.050593	0.082429	0.057125	0.022814	0.123517	0.011915	0.023626	0.031822	0.047662	0.013183	0.010539	0.10591	0.013949	0.001867	0.002011	0.005882	0.028553	0.024204	0.087626	0.020899	0.01779	0.003427
Paranaguá	Paraná	SO	4833	0.082448	0.273793	0.100329	0.050122	0.038416	0.101683	0.013346	0.027614	0.043804	0.043515	0.063942	0.032544	0.027286	0.004655	0.003683	0	0.007035	0.071189	0.001966	0.009932	0.001448	0.070294	0.042036	0.014462	0.043443	0.103995	0.042536	0.022787	0.120293	0.009828	0.021869	0.037382	0.053312	0.013035	0.009414	0.110874	0.013035	0.000414	0.002173	0.015684	0.032729	0.025098	0.081619	0.022848	0.020036	0.000414
Pinhais	Paraná	SO	6761	0.092077	0.265142	0.101565	0.053794	0.046199	0.097359	0.015187	0.035373	0.043644	0.041376	0.059457	0.02942	0.025457	0.006434	0.004807	0	0.009805	0.057767	0.002145	0.007913	0.001479	0.074101	0.052581	0.015678	0.053542	0.100503	0.044224	0.02618	0.118991	0.009096	0.024848	0.037864	0.052581	0.012202	0.009762	0.105828	0.016861	0.000444	0.00244	0.010132	0.027067	0.022112	0.074767	0.020633	0.020115	0.000444
Piraquara	Paraná	SO	3557	0.093584	0.264429	0.087995	0.047453	0.040337	0.105214	0.016785	0.036738	0.048917	0.040154	0.063862	0.028001	0.02817	0.008294	0.002671	0	0.010768	0.060987	0.001999	0.008996	0.001125	0.070164	0.050197	0.015884	0.04863	0.096355	0.047231	0.023079	0.117779	0.008153	0.029174	0.042073	0.053629	0.011466	0.010761	0.10672	0.017149	0	0.002109	0.013354	0.023531	0.020981	0.073511	0.026708	0.019236	0.000281
Ponta Grossa	Paraná	SO	15819	0.106563	0.267693	0.108129	0.04942	0.034756	0.111005	0.017959	0.038577	0.037509	0.033488	0.060131	0.029642	0.027999	0.005364	0.003003	3.2e-05	0.007041	0.052351	0.001138	0.005608	0.001422	0.075168	0.062422	0.016906	0.05403	0.086082	0.0511	0.028949	0.114503	0.008546	0.029349	0.039923	0.051841	0.01266	0.007828	0.104932	0.011798	0.000253	0.001843	0.010983	0.023358	0.021369	0.078192	0.027891	0.011782	0.000379
São José dos Pinhais	Paraná	SO	11068	0.096533	0.26732	0.100298	0.052149	0.038569	0.099497	0.016009	0.037694	0.041421	0.042741	0.056225	0.031412	0.027292	0.005441	0.003478	9e-05	0.007659	0.062308	0.000994	0.007975	0.00131	0.073884	0.056248	0.016341	0.051245	0.093866	0.051448	0.028212	0.118187	0.0089	0.026463	0.036478	0.052958	0.010887	0.008267	0.104678	0.014011	0.000226	0.00262	0.009692	0.026274	0.0195	0.080891	0.022733	0.015435	0.000542
Telêmaco Borba	Paraná	SO	627	0.089314	0.286284	0.106858	0.049442	0.032695	0.10925	0.012759	0.039075	0.044657	0.039075	0.056619	0.030303	0.030303	0.000797	0.003987	0	0.00638	0.051037	0.001595	0.00638	0.00319	0.083732	0.051834	0.015949	0.066188	0.088517	0.047847	0.026316	0.116427	0.00319	0.0311	0.038278	0.047049	0.011962	0.007177	0.091707	0.015152	0	0.002392	0.009569	0.026316	0.03429	0.086124	0.020734	0.017544	0
Toledo	Paraná	SO	3650	0.1008	0.264125	0.11022	0.059011	0.04111	0.100147	0.016543	0.039937	0.041537	0.040482	0.04111	0.038444	0.027194	0.004521	0.002877	0	0.006575	0.052217	0.001644	0.007123	0.001781	0.07627	0.064091	0.019965	0.049976	0.085988	0.049567	0.029988	0.117213	0.010949	0.027247	0.030666	0.04957	0.01136	0.005616	0.109128	0.010137	0.000274	0.001781	0.006712	0.026288	0.019583	0.092976	0.015746	0.01411	0.000548
Alvorada	Rio Grande do Sul	SO	4574	0.088053	0.258003	0.098236	0.05433	0.046187	0.106314	0.014539	0.030898	0.051854	0.041467	0.057928	0.032468	0.027376	0.00645	0.005356	0.000111	0.008526	0.057795	0.00164	0.007761	0.00153	0.070976	0.053078	0.014157	0.062539	0.091341	0.042974	0.023614	0.122026	0.008964	0.021696	0.036156	0.050457	0.013774	0.009292	0.116302	0.015935	0	0.00164	0.010822	0.023484	0.022043	0.076789	0.015118	0.023102	0
Bento Gonçalves	Rio Grande do Sul	SO	4236	0.114495	0.272663	0.104816	0.054533	0.027738	0.114259	0.022309	0.03966	0.041313	0.032578	0.044145	0.043201	0.021601	0.003187	0.003895	0	0.002479	0.051464	0.002125	0.003305	0.000236	0.064526	0.075456	0.025525	0.03717	0.071314	0.064171	0.025407	0.136779	0.012512	0.031011	0.035056	0.042722	0.010936	0.002007	0.102614	0.00661	0.000118	0.002243	0.004299	0.02441	0.017587	0.115851	0.014839	0.009797	0.000118
Cachoeirinha	Rio Grande do Sul	SO	4451	0.092288	0.27812	0.105718	0.050663	0.039462	0.101504	0.014065	0.032403	0.052224	0.036574	0.051975	0.034166	0.022514	0.004943	0.002921	0.000112	0.008874	0.056427	0.002359	0.007289	0.000786	0.071758	0.051169	0.015053	0.055907	0.084737	0.041189	0.023406	0.129044	0.011631	0.024496	0.034581	0.05	0.011741	0.005841	0.121892	0.015005	0.000337	0.00146	0.007347	0.02089	0.02228	0.09169	0.015793	0.016084	0.000112
Canoas	Rio Grande do Sul	SO	11980	0.096596	0.273318	0.103632	0.050427	0.04128	0.106192	0.016036	0.028408	0.05087	0.037622	0.052827	0.033772	0.026594	0.004499	0.003493	0	0.007095	0.054031	0.00172	0.007349	0.000876	0.078513	0.058036	0.015578	0.058046	0.090048	0.047729	0.024434	0.118751	0.010267	0.022875	0.034157	0.048414	0.012288	0.006511	0.117856	0.013393	8.3e-05	0.00217	0.009095	0.023996	0.020727	0.084571	0.016205	0.015829	8.3e-05
Caxias do Sul	Rio Grande do Sul	SO	18057	0.110892	0.274863	0.106992	0.051964	0.03652	0.113074	0.014642	0.035686	0.040787	0.033122	0.049548	0.038162	0.022057	0.003693	0.002444	0	0.005869	0.048236	0.002437	0.004842	0.001025	0.075083	0.063638	0.018692	0.041576	0.08274	0.05472	0.024752	0.132149	0.010534	0.026321	0.036335	0.046915	0.010173	0.005934	0.10749	0.012252	2.8e-05	0.002492	0.006496	0.023365	0.019148	0.099514	0.015079	0.01262	2.8e-05
Esteio	Rio Grande do Sul	SO	3126	0.098259	0.280358	0.098717	0.056891	0.050188	0.103504	0.015174	0.030687	0.044072	0.034027	0.060098	0.031636	0.024924	0.003679	0.002719	0	0.006718	0.049693	0.00112	0.005711	0.00064	0.071793	0.059344	0.016493	0.052947	0.082351	0.043321	0.025698	0.124451	0.007898	0.023879	0.038426	0.050214	0.011828	0.005278	0.124712	0.014564	0	0.001599	0.00629	0.026232	0.023225	0.085235	0.012874	0.009986	0
Gravataí	Rio Grande do Sul	SO	9006	0.096882	0.275348	0.102372	0.053208	0.040064	0.101767	0.015587	0.028858	0.053392	0.041119	0.049883	0.03363	0.025417	0.00483	0.003609	5.6e-05	0.007995	0.056043	0.001666	0.006718	0.001055	0.069824	0.0574	0.017608	0.055477	0.081841	0.041406	0.025782	0.125161	0.012677	0.022161	0.032935	0.047157	0.011453	0.008183	0.120387	0.014024	0	0.001999	0.01016	0.027005	0.022684	0.084126	0.016207	0.015858	0
Guaíba	Rio Grande do Sul	SO	2070	0.096837	0.266371	0.096359	0.049269	0.047323	0.104327	0.014727	0.029948	0.052156	0.04323	0.055291	0.032847	0.028986	0.007005	0.00314	0	0.008213	0.050469	0.002415	0.009903	0.000966	0.064034	0.055902	0.014898	0.049637	0.085378	0.045489	0.026416	0.126361	0.009316	0.02356	0.036636	0.047943	0.011836	0.007971	0.131351	0.0132	0	0.000966	0.008454	0.027387	0.021256	0.089689	0.011836	0.016667	0
Novo Hamburgo	Rio Grande do Sul	SO	7997	0.111752	0.285068	0.117828	0.050962	0.038617	0.104604	0.014367	0.031095	0.040703	0.032676	0.046619	0.03361	0.022312	0.003343	0.002001	0	0.008003	0.046282	0.001876	0.005225	0.001125	0.088834	0.067345	0.017589	0.046678	0.083094	0.047823	0.030745	0.125584	0.010316	0.02353	0.031504	0.05249	0.008547	0.003814	0.115891	0.012289	6.3e-05	0.001813	0.00569	0.023821	0.021159	0.079356	0.014957	0.011317	0.000188
Passo Fundo	Rio Grande do Sul	SO	9873	0.107507	0.269239	0.104056	0.051585	0.03521	0.11514	0.01491	0.036169	0.041568	0.032544	0.058728	0.037072	0.022262	0.003697	0.00238	0	0.005602	0.054204	0.00157	0.003444	0.001317	0.067043	0.061613	0.019964	0.047437	0.084227	0.055533	0.024896	0.126649	0.012142	0.025928	0.042812	0.05054	0.011483	0.004406	0.104977	0.010963	5.1e-05	0.002684	0.008036	0.02492	0.016652	0.102229	0.020166	0.00942	0.000101
Pelotas	Rio Grande do Sul	SO	13425	0.098268	0.271179	0.104431	0.054547	0.045747	0.095511	0.01529	0.034188	0.049342	0.0409	0.044228	0.035706	0.026678	0.004655	0.003277	0.000149	0.008892	0.056005	0.001564	0.006906	0.001155	0.075717	0.055126	0.017123	0.061415	0.083483	0.043998	0.028001	0.116573	0.010525	0.02192	0.030558	0.047101	0.010999	0.007043	0.129818	0.01674	7.4e-05	0.002495	0.005624	0.026516	0.026929	0.078973	0.010875	0.016778	0.000149
Porto Alegre	Rio Grande do Sul	SO	53545	0.099827	0.26961	0.103921	0.052966	0.041421	0.103991	0.015298	0.033046	0.04894	0.038351	0.049478	0.036239	0.026265	0.004711	0.003609	8.4e-05	0.008042	0.053028	0.001662	0.006083	0.001139	0.073014	0.057134	0.018724	0.054077	0.082507	0.047796	0.026182	0.124181	0.010943	0.022858	0.032895	0.048084	0.011663	0.006537	0.11904	0.015181	0.000149	0.002484	0.007747	0.025714	0.020838	0.086086	0.014458	0.016143	0.000196
Rio Grande	Rio Grande do Sul	SO	3828	0.0996	0.267369	0.10035	0.049816	0.043645	0.096585	0.013988	0.03001	0.052104	0.047592	0.044714	0.039908	0.02885	0.002482	0.003004	0	0.008098	0.058214	0.002743	0.007184	0.001698	0.074112	0.05064	0.01762	0.068126	0.075563	0.043432	0.027516	0.119276	0.008989	0.023873	0.025722	0.041239	0.013175	0.004572	0.127347	0.01579	0.000522	0.001959	0.006139	0.027421	0.034461	0.088085	0.009666	0.018091	0.000522
São Leopoldo	Rio Grande do Sul	SO	4794	0.111943	0.278356	0.105858	0.053161	0.036768	0.09545	0.016166	0.035713	0.047733	0.031494	0.05229	0.035437	0.026638	0.003963	0.002399	0	0.006213	0.050096	0.001669	0.00527	0.001043	0.081039	0.064038	0.016896	0.05121	0.08156	0.043596	0.030455	0.119942	0.010221	0.021485	0.035878	0.052774	0.013141	0.004798	0.118377	0.014184	0.000209	0.001773	0.007092	0.023467	0.020651	0.081873	0.015436	0.013976	0.000104
Sapiranga	Rio Grande do Sul	SO	2315	0.11083	0.282924	0.102405	0.049915	0.043319	0.096904	0.012664	0.035813	0.045856	0.032318	0.046388	0.036356	0.020838	0.004536	0.00216	0	0.010799	0.057137	0.001296	0.003456	0.000432	0.080282	0.06769	0.021126	0.046728	0.090529	0.041379	0.033586	0.112037	0.010583	0.022857	0.032181	0.054669	0.011879	0.004536	0.120388	0.012311	0.000432	0.000216	0.005832	0.024335	0.017881	0.078228	0.02022	0.019654	0
Sapucaia do Sul	Rio Grande do Sul	SO	3465	0.100289	0.28557	0.105051	0.051227	0.04329	0.106782	0.01342	0.029437	0.047042	0.037807	0.051371	0.0329	0.021789	0.005051	0.00202	0.000144	0.006494	0.050938	0.001443	0.007504	0.000433	0.071135	0.061165	0.012374	0.053051	0.080098	0.042399	0.02738	0.133675	0.010534	0.022633	0.037274	0.050531	0.011178	0.003896	0.121228	0.013642	0	0.00202	0.008947	0.024944	0.023167	0.088139	0.014574	0.013242	0
Viamão	Rio Grande do Sul	SO	4901	0.097864	0.259431	0.094187	0.049714	0.047932	0.104108	0.011732	0.03299	0.051025	0.04206	0.055149	0.030667	0.033297	0.007345	0.004333	0	0.008738	0.055558	0.001836	0.007715	0.001938	0.069135	0.056692	0.012918	0.060149	0.08974	0.042761	0.023057	0.118475	0.011385	0.022289	0.037896	0.050772	0.013977	0.010055	0.116651	0.018374	0.000204	0.001326	0.01026	0.023592	0.019412	0.07743	0.013671	0.019954	0.000102
Balneário Camboriú	Santa Catarina	SO	1770	0.107	0.28272	0.109283	0.059973	0.030974	0.102079	0.016586	0.032909	0.052165	0.033476	0.044734	0.034463	0.025532	0.003955	0.000282	0	0.005085	0.049268	0.001695	0.003107	0.001412	0.075989	0.060452	0.020056	0.050282	0.070056	0.04548	0.031073	0.126836	0.013277	0.022034	0.038983	0.050565	0.011017	0.00565	0.118079	0.009605	0.000282	0.00452	0.007062	0.029096	0.023164	0.083898	0.018079	0.013559	0.000565
Blumenau	Santa Catarina	SO	14965	0.120026	0.28391	0.113262	0.049758	0.035095	0.09582	0.016718	0.035537	0.043863	0.029456	0.045069	0.036281	0.024549	0.002283	0.001236	0	0.007459	0.051611	0.001403	0.003375	0.001036	0.087372	0.068206	0.019645	0.042992	0.078671	0.048306	0.030739	0.119134	0.011586	0.025344	0.032675	0.054972	0.011753	0.003425	0.129675	0.009228	0.000134	0.003408	0.004678	0.025108	0.017208	0.080466	0.014147	0.012742	0.000401
Brusque	Santa Catarina	SO	4249	0.131443	0.260532	0.12603	0.057661	0.028242	0.103083	0.018475	0.039892	0.042716	0.025888	0.037538	0.03895	0.023064	0.002118	0.001059	0	0.00506	0.052601	0.002353	0.00306	0.000235	0.099625	0.070604	0.019982	0.042619	0.073555	0.05247	0.021019	0.129369	0.010708	0.026458	0.028914	0.052538	0.009138	0.002471	0.123648	0.005884	0.000118	0.003883	0.00441	0.027465	0.015269	0.08467	0.013297	0.012003	0
Chapecó	Santa Catarina	SO	7985	0.111736	0.275571	0.110346	0.054454	0.030979	0.114502	0.019356	0.037951	0.039311	0.029175	0.04845	0.042189	0.019715	0.002254	0.001324	0	0.004508	0.050269	0.000939	0.002645	0.000313	0.072953	0.067527	0.023211	0.041455	0.074669	0.058351	0.025323	0.13134	0.013306	0.027733	0.039981	0.050942	0.010564	0.00263	0.10795	0.00998	0	0.002401	0.007264	0.02315	0.015236	0.09903	0.017645	0.008181	6.3e-05
Criciúma	Santa Catarina	SO	7229	0.097584	0.290274	0.105565	0.055708	0.043901	0.096306	0.016433	0.034117	0.058282	0.031963	0.043125	0.033718	0.019863	0.003182	0.002697	6.9e-05	0.007401	0.046276	0.001522	0.005393	0.000968	0.073991	0.054688	0.019943	0.045425	0.070726	0.044813	0.025644	0.141044	0.007977	0.029048	0.030958	0.044907	0.009925	0.004012	0.124116	0.010652	0.000138	0.003476	0.004911	0.022955	0.025891	0.099383	0.009647	0.016565	6.9e-05
Florianópolis	Santa Catarina	SO	22075	0.104364	0.278174	0.104486	0.05682	0.042028	0.100632	0.015482	0.035856	0.052026	0.033031	0.040315	0.034763	0.027358	0.003293	0.00265	2.3e-05	0.007729	0.051233	0.001971	0.004359	0.000951	0.075951	0.057072	0.016701	0.054668	0.075311	0.048179	0.028461	0.126916	0.012767	0.024576	0.028479	0.049202	0.011303	0.00486	0.123296	0.011875	0.000453	0.002718	0.005028	0.027512	0.021999	0.084636	0.015502	0.015258	0.000453
Itajaí	Santa Catarina	SO	3425	0.107525	0.273234	0.117303	0.047857	0.04218	0.108677	0.013256	0.036598	0.052796	0.030199	0.043032	0.031342	0.025824	0.004964	0.000584	0	0.005985	0.05062	0.001752	0.004964	0.000584	0.077518	0.06	0.014453	0.055328	0.072847	0.048029	0.026569	0.126277	0.011825	0.02219	0.029489	0.048905	0.008905	0.00365	0.141606	0.010365	0.000146	0.00292	0.005693	0.030219	0.01927	0.084526	0.014599	0.014891	0
Itapema	Santa Catarina	SO	520	0.110421	0.283319	0.114272	0.056603	0.032692	0.116176	0.014423	0.036538	0.044177	0.024908	0.047014	0.034548	0.022115	0.005769	0.001923	0	0.006731	0.042251	0.000962	0.003846	0	0.076974	0.062933	0.008654	0.047433	0.076004	0.042578	0.027961	0.109545	0.008654	0.030769	0.031315	0.059062	0.01517	0.006731	0.139662	0.010878	0	0.001923	0.003846	0.021154	0.017308	0.090544	0.018269	0.004808	0
Joinville	Santa Catarina	SO	17108	0.107399	0.278994	0.110125	0.054226	0.039051	0.098009	0.01601	0.034942	0.044894	0.032571	0.052026	0.031824	0.023632	0.003069	0.002192	2.9e-05	0.006502	0.05404	0.001491	0.005081	0.000468	0.0842	0.060415	0.01699	0.044449	0.077006	0.046465	0.02935	0.122205	0.011625	0.022641	0.036078	0.055088	0.009899	0.004062	0.132674	0.011092	0.000146	0.005348	0.005542	0.028988	0.018916	0.077747	0.014327	0.015306	0.00038
Lages	Santa Catarina	SO	5252	0.106944	0.268404	0.111427	0.051762	0.036641	0.100201	0.015232	0.031693	0.047382	0.037376	0.059186	0.032362	0.028066	0.00457	0.00238	0	0.005807	0.054796	0.000666	0.003499	0.001047	0.084832	0.054521	0.014566	0.055004	0.076396	0.045885	0.019773	0.130561	0.011973	0.017327	0.036324	0.046859	0.010472	0.006664	0.123513	0.014566	0.000293	0.001714	0.006917	0.021311	0.022346	0.093123	0.015613	0.018057	0.000762
Palhoça	Santa Catarina	SO	4342	0.103408	0.28523	0.094374	0.053839	0.046409	0.09278	0.015151	0.035904	0.05752	0.032493	0.039584	0.038364	0.025999	0.001842	0.001173	0	0.010419	0.053315	0.001382	0.004146	0.000921	0.080748	0.053234	0.014164	0.053132	0.075796	0.043492	0.029108	0.118573	0.012855	0.027011	0.026615	0.046231	0.012119	0.005412	0.134027	0.011239	0.000345	0.001267	0.004836	0.029617	0.024128	0.086762	0.015393	0.014009	0.00023
São José	Santa Catarina	SO	9404	0.102462	0.284858	0.107736	0.052744	0.04363	0.092419	0.013507	0.036783	0.056363	0.030969	0.042432	0.032853	0.025405	0.003243	0.002529	0	0.007259	0.053174	0.001382	0.006514	0.000585	0.080477	0.056915	0.016452	0.056775	0.077891	0.042837	0.027709	0.121539	0.01215	0.027555	0.029951	0.04574	0.010513	0.005423	0.130645	0.012629	0.00016	0.003403	0.004495	0.026803	0.021669	0.081073	0.015493	0.017158	0.000106
Tubarão	Santa Catarina	SO	4988	0.100023	0.285526	0.094221	0.055767	0.04669	0.111486	0.015497	0.031224	0.052154	0.03034	0.045942	0.035579	0.020243	0.002606	0.002706	0	0.009168	0.050194	0.001002	0.003735	0.000601	0.08332	0.048143	0.015602	0.047916	0.066984	0.040535	0.024285	0.143009	0.012509	0.026317	0.026819	0.051261	0.010425	0.002506	0.136759	0.011381	0	0.003107	0.003809	0.028325	0.02085	0.098269	0.007117	0.012768	0.000301
[truncated: 24 more columns]
